# Supplementary material
Source: PubMed Central journal article supplement (PMC3203994)

**Supporting Information**  
for  
**New Antiplasmodial Pseudoguaianolides of *Athroisma proteiforme***  
**from the Madagascar Dry Forest**

Ende Pan, Alexander P. Gorka, John N. Alumasa, Carla Slebodnick, Liva Harinantenaina, Peggy J. Brodie, Paul D. Roepe, Richard Randrianaivo, Chris Birkinshaw, and David G. I. Kingston

**Contents**

|            |       |
|------------|-------|
| Compound 1 | p. 2  |
| Compound 2 | p. 8  |
| Compound 3 | p. 14 |
| Compound 4 | p. 20 |
| Compound 5 | p. 26 |

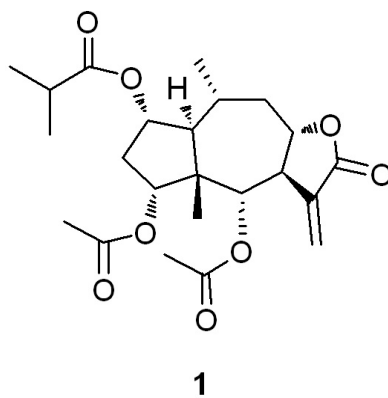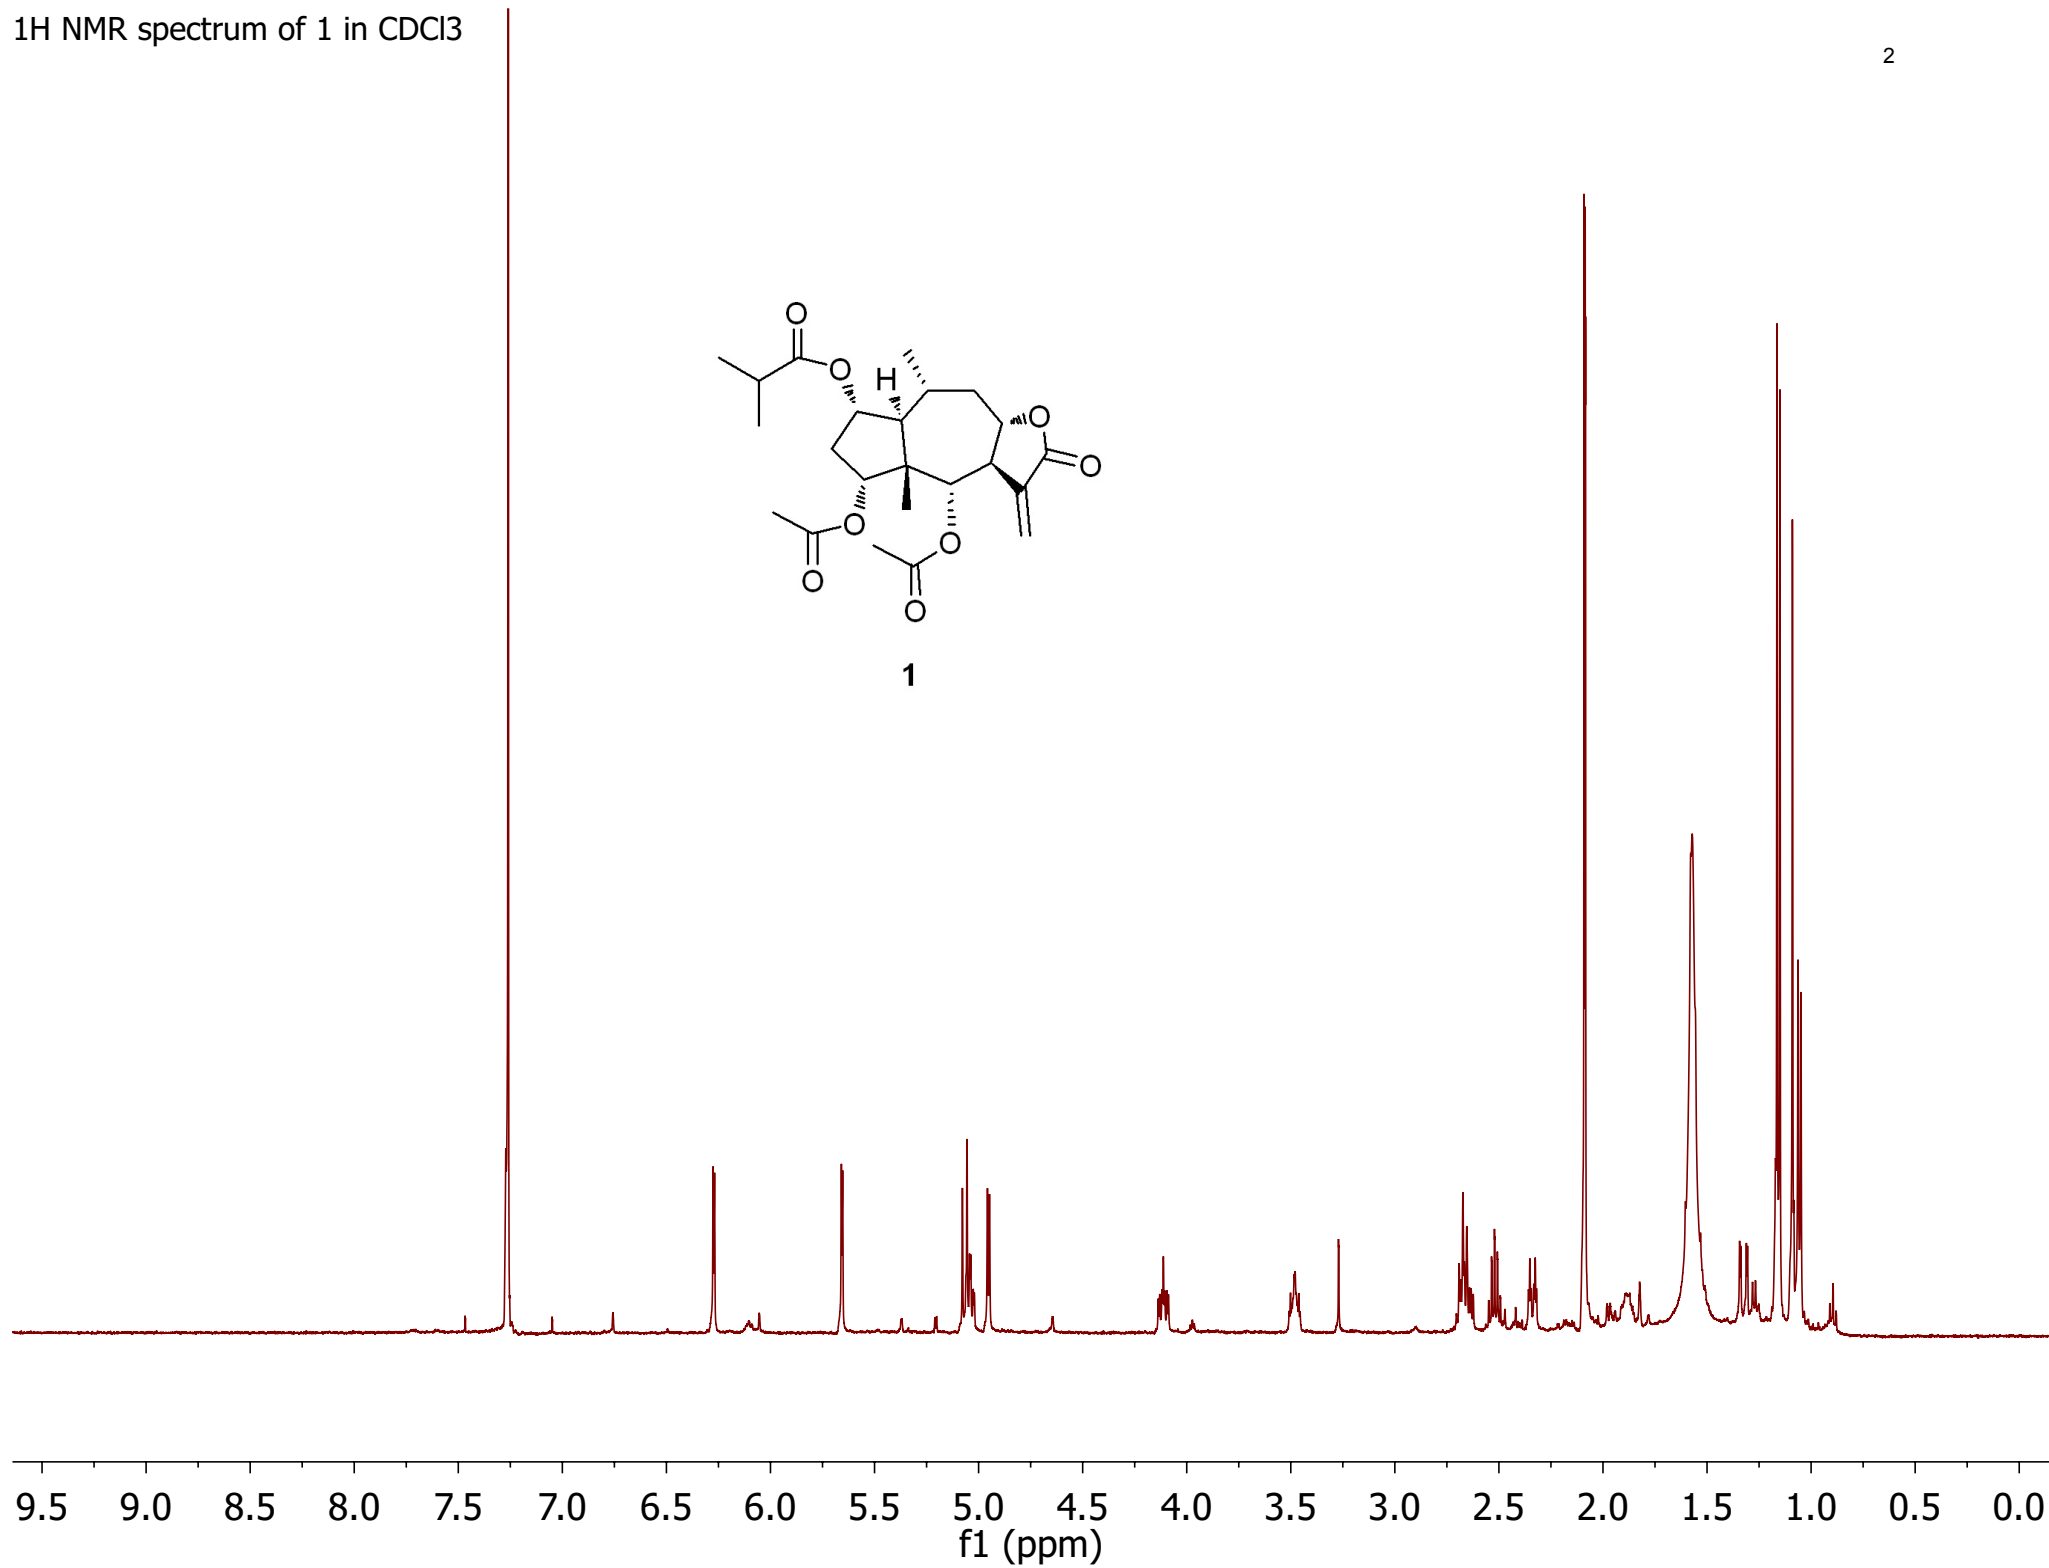

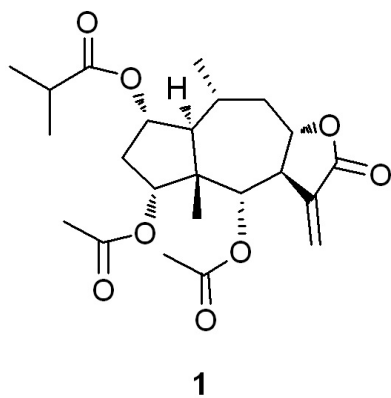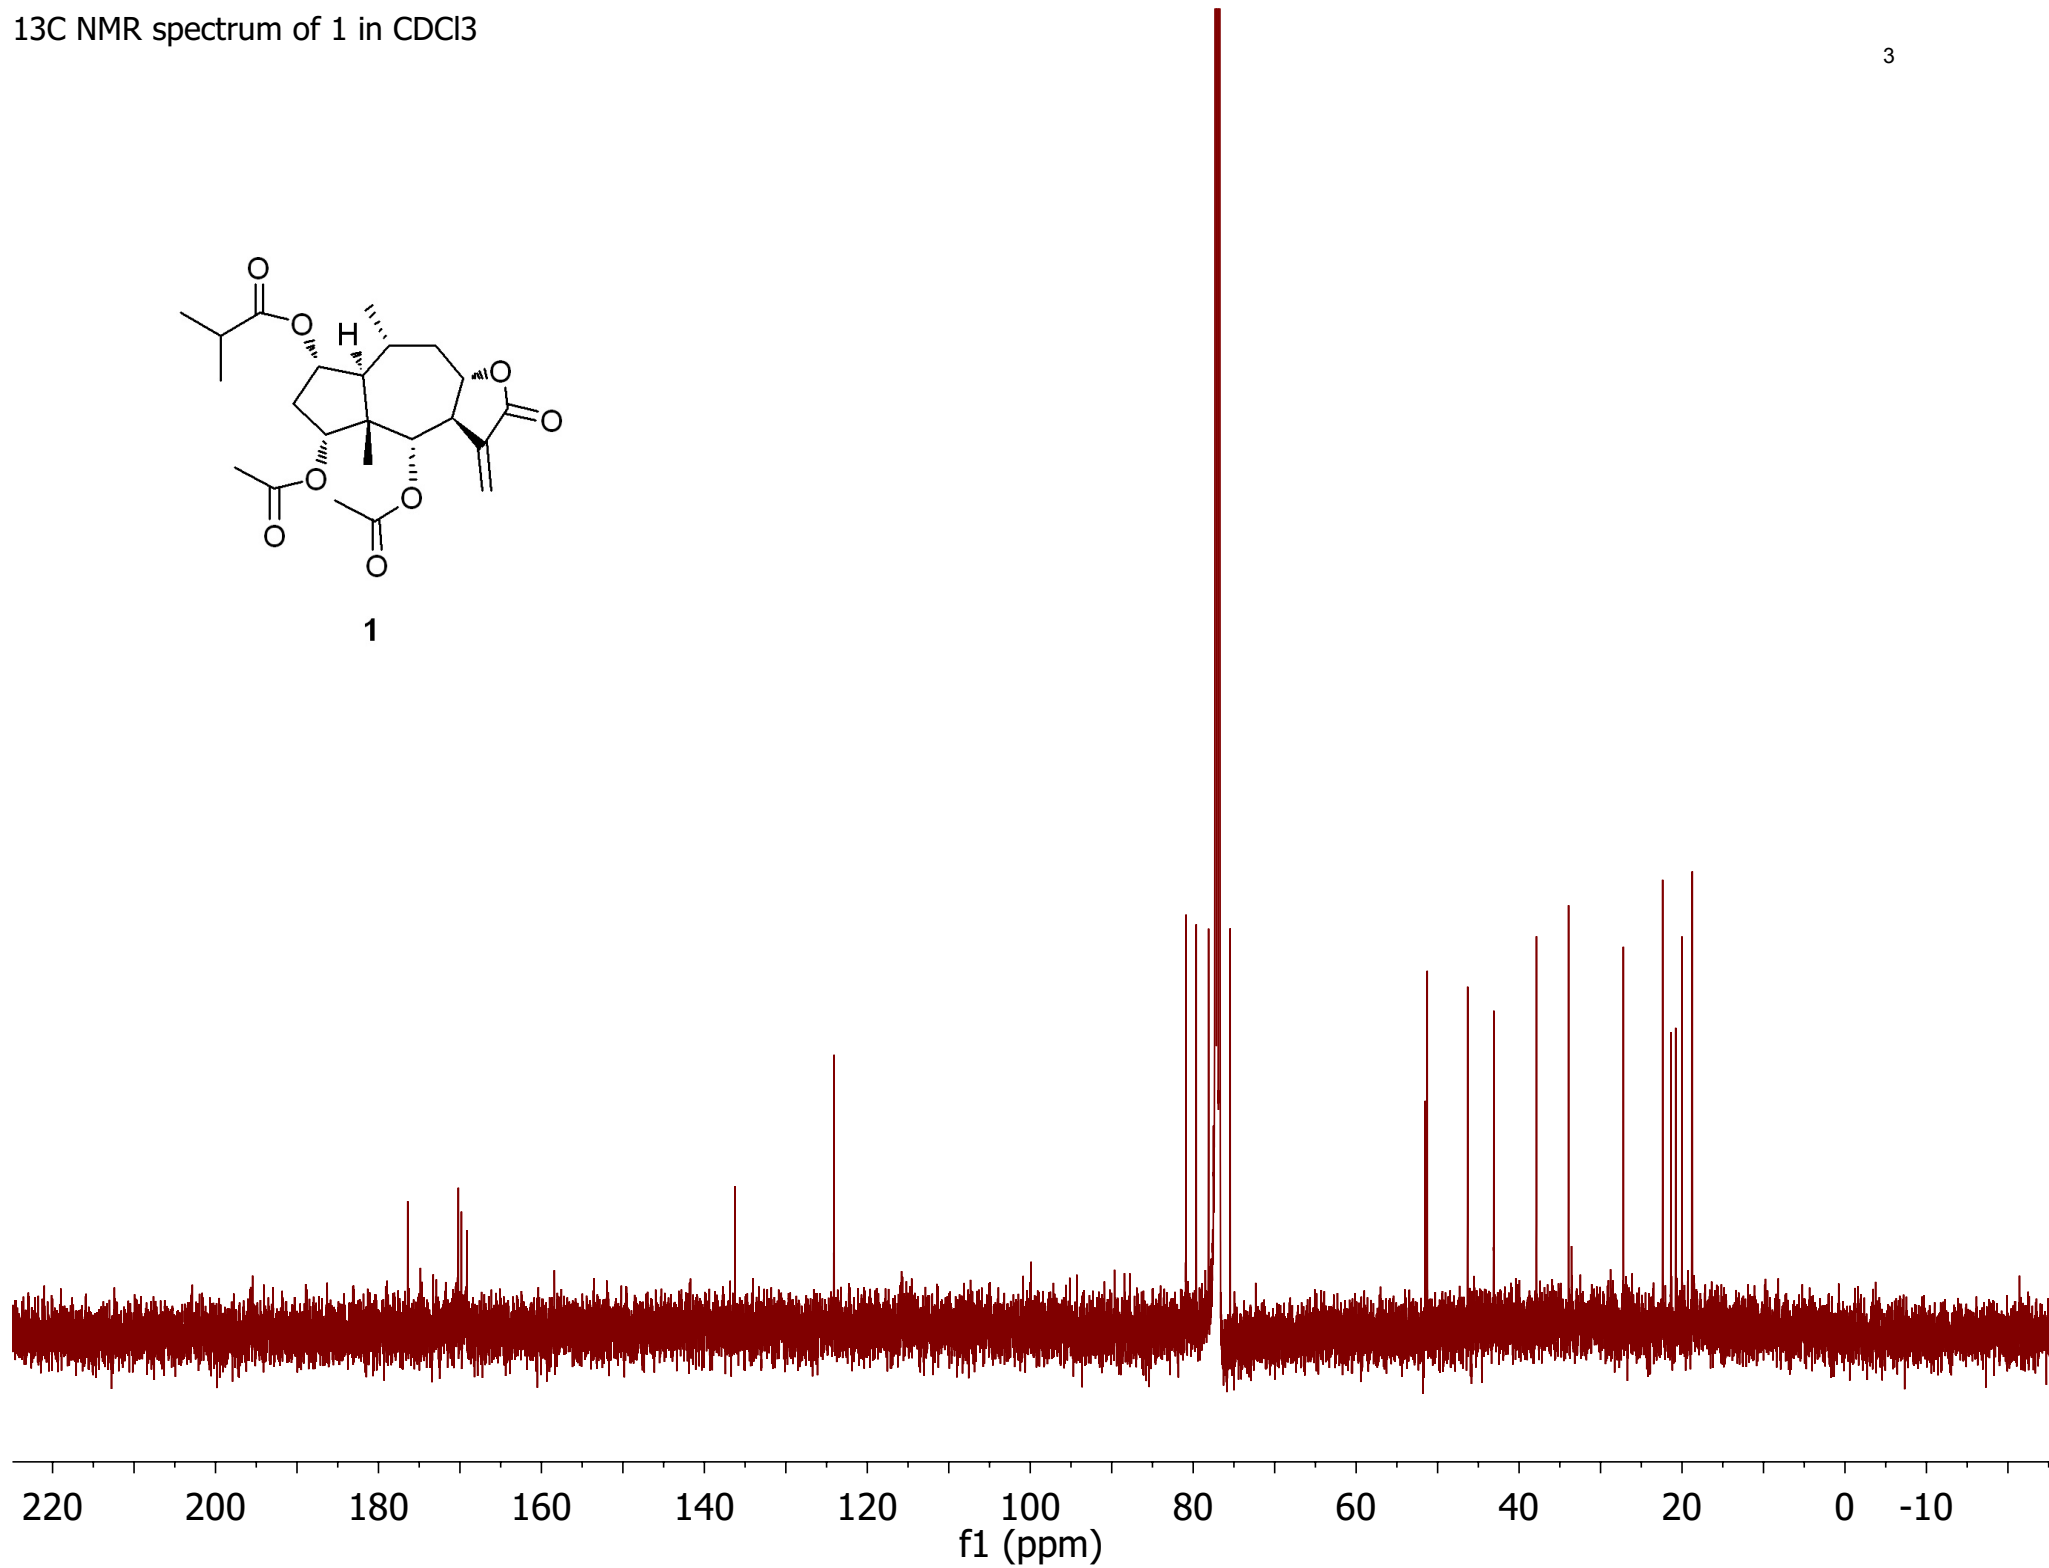

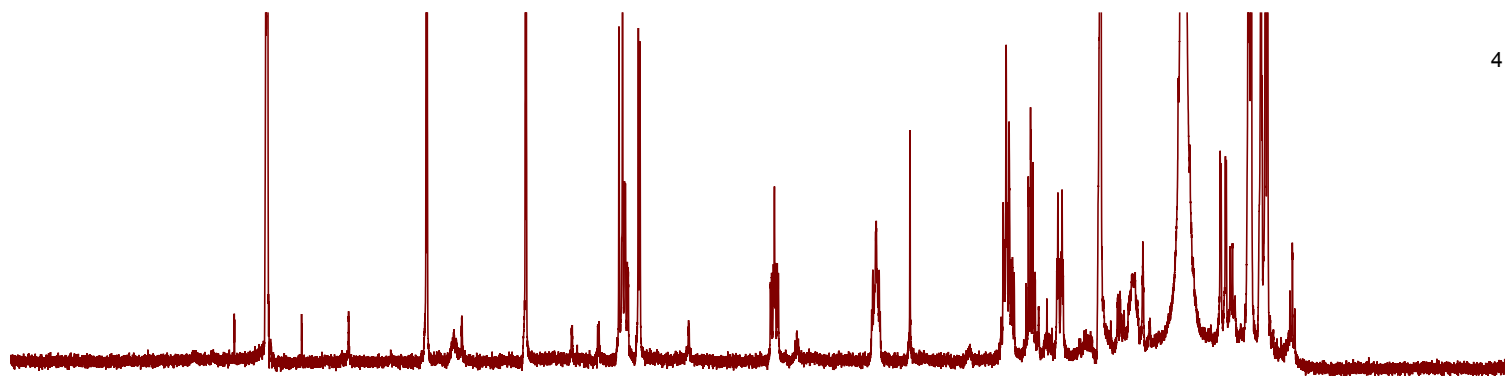COSY spectrum of 1 in CDCl<sub>3</sub>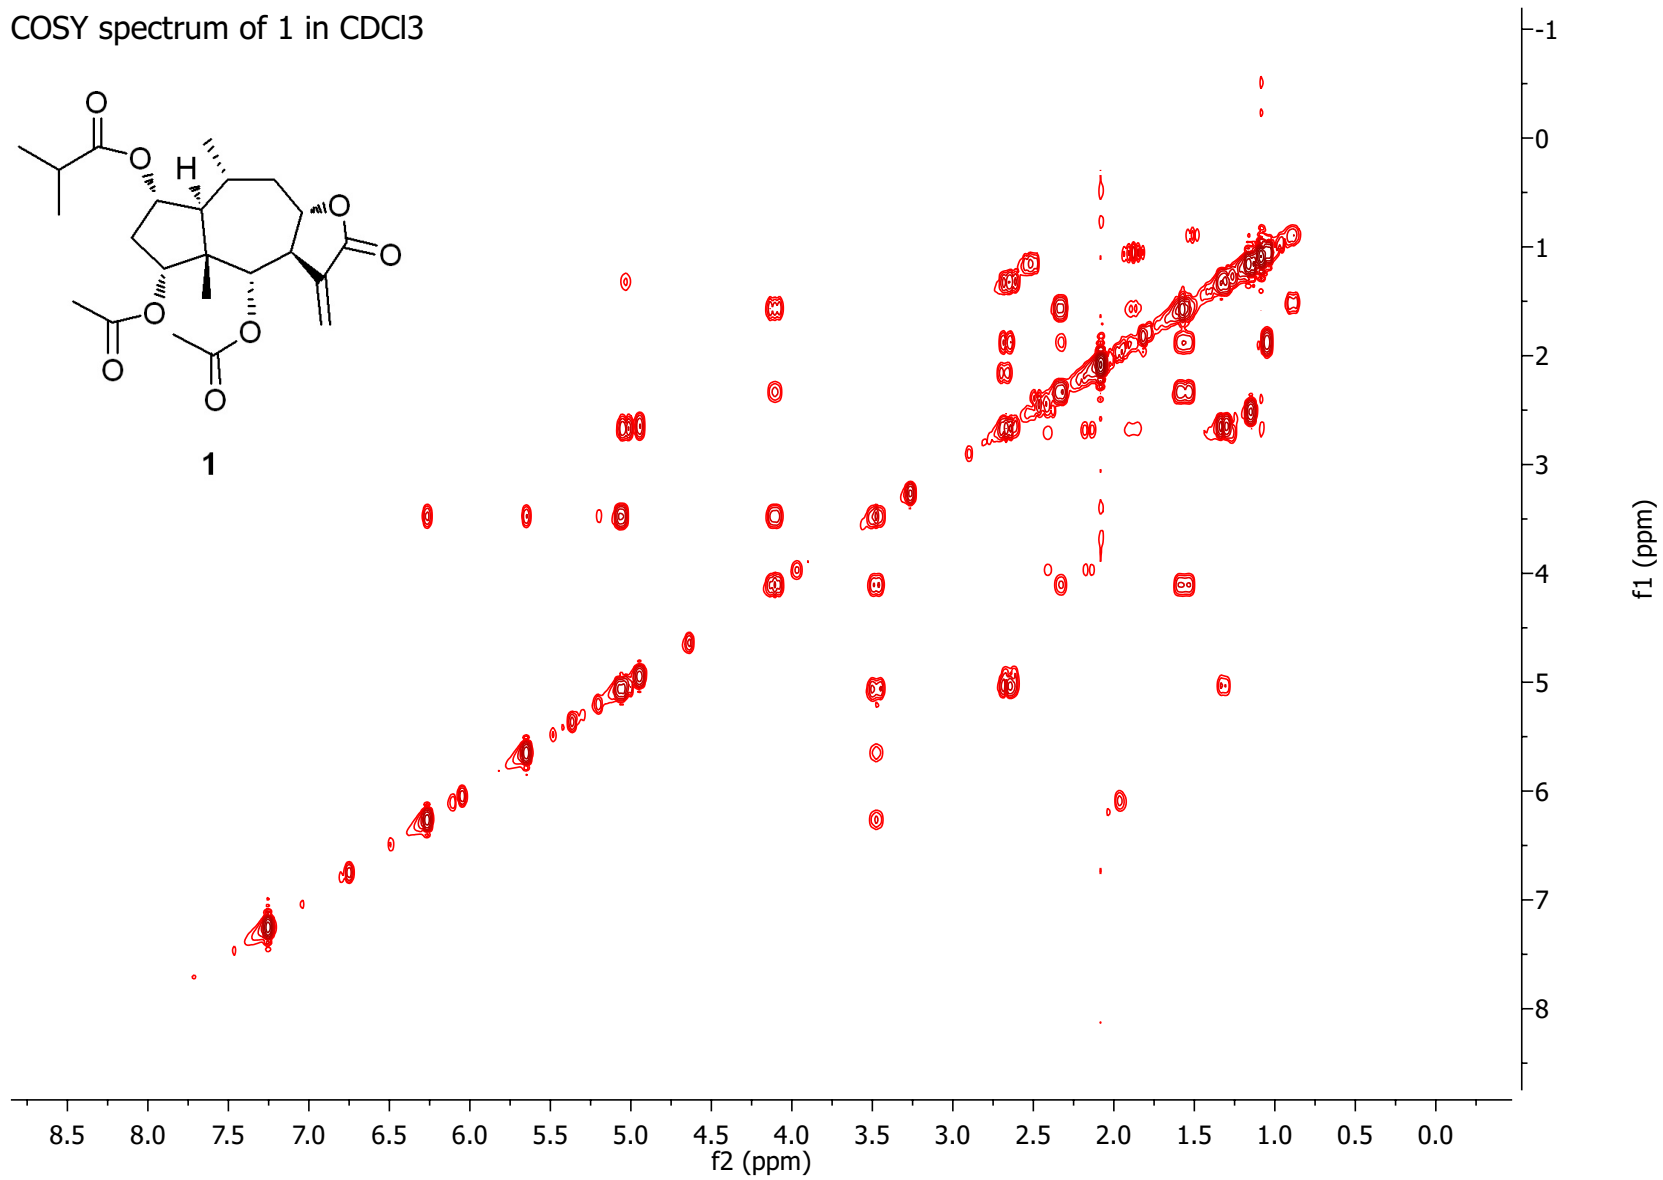

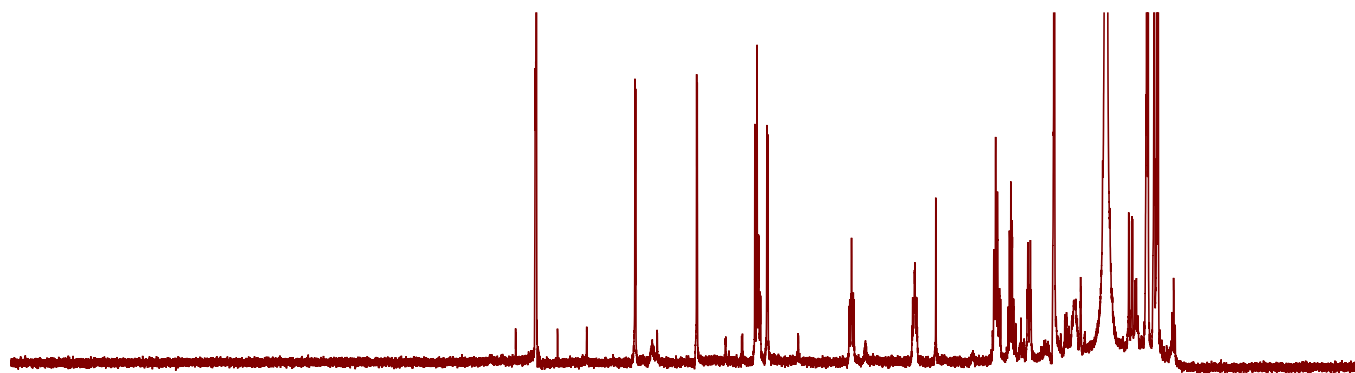HMBC spectrum of 1 in CDCl<sub>3</sub>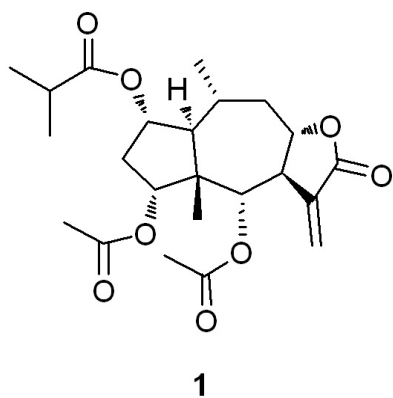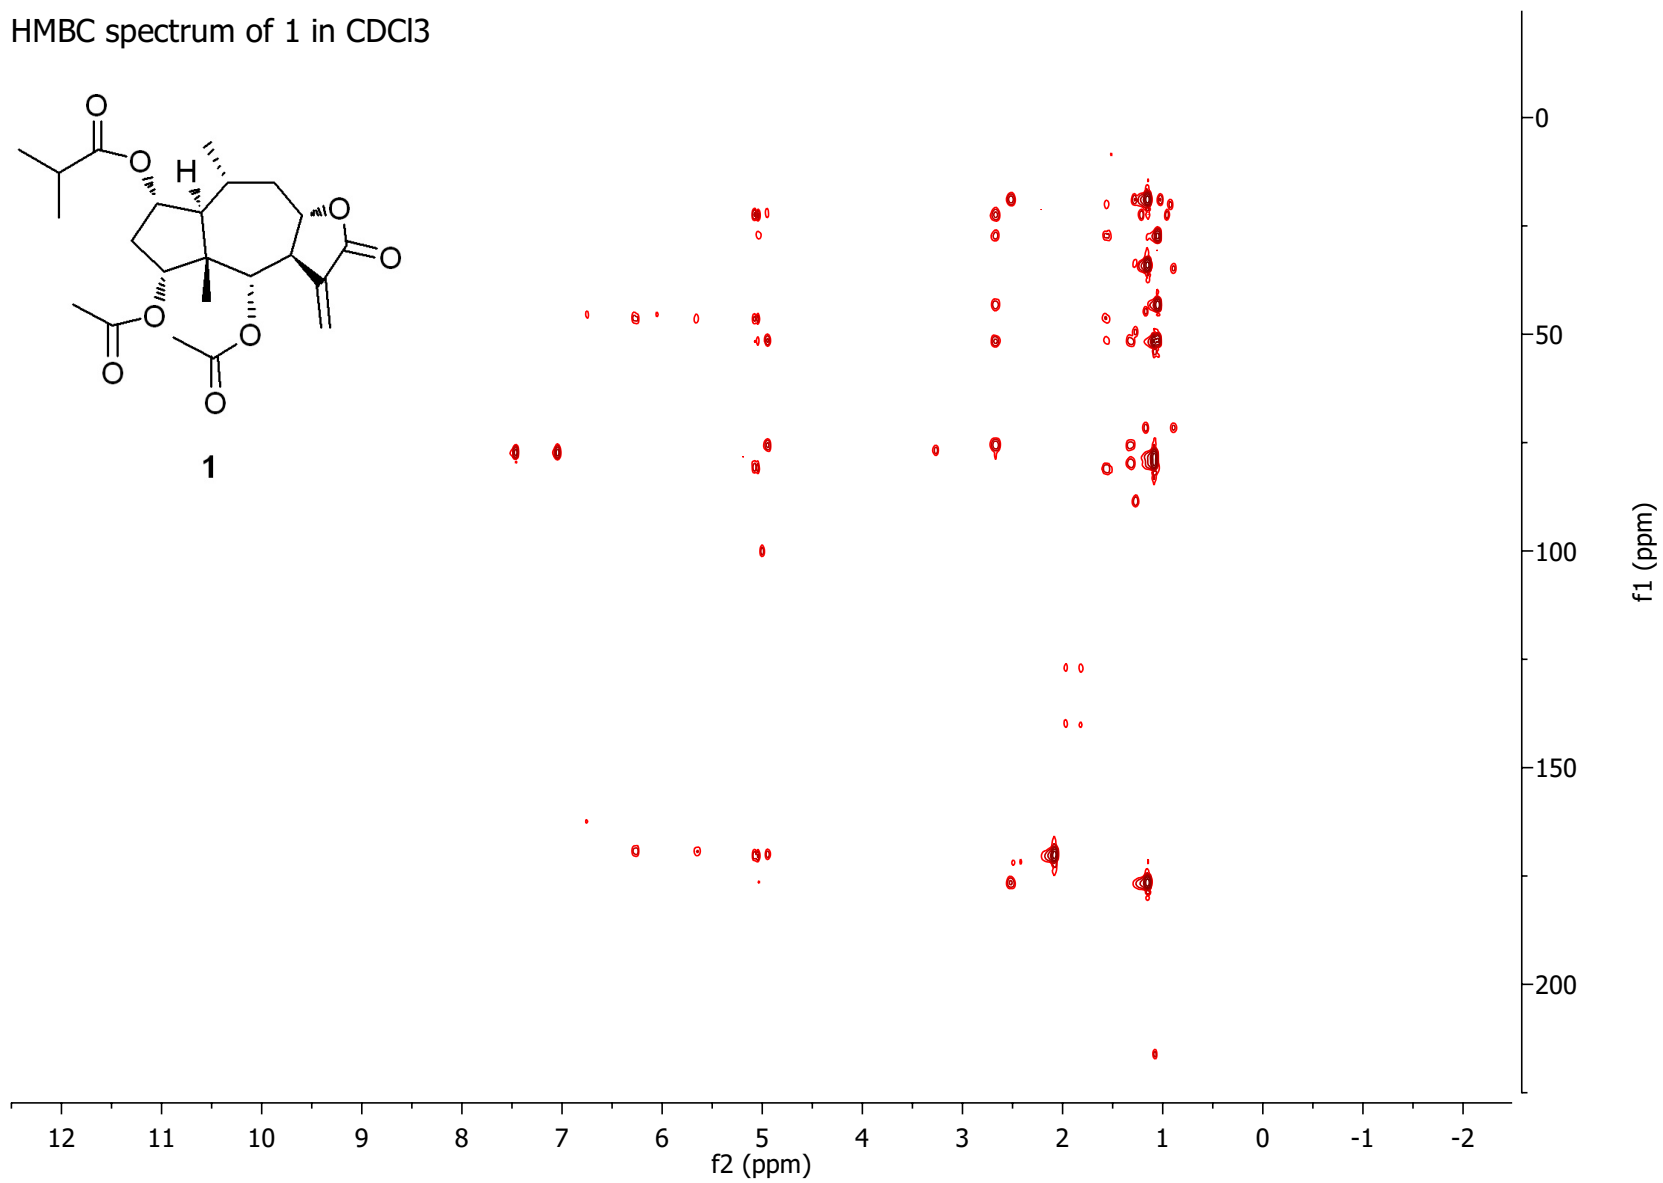

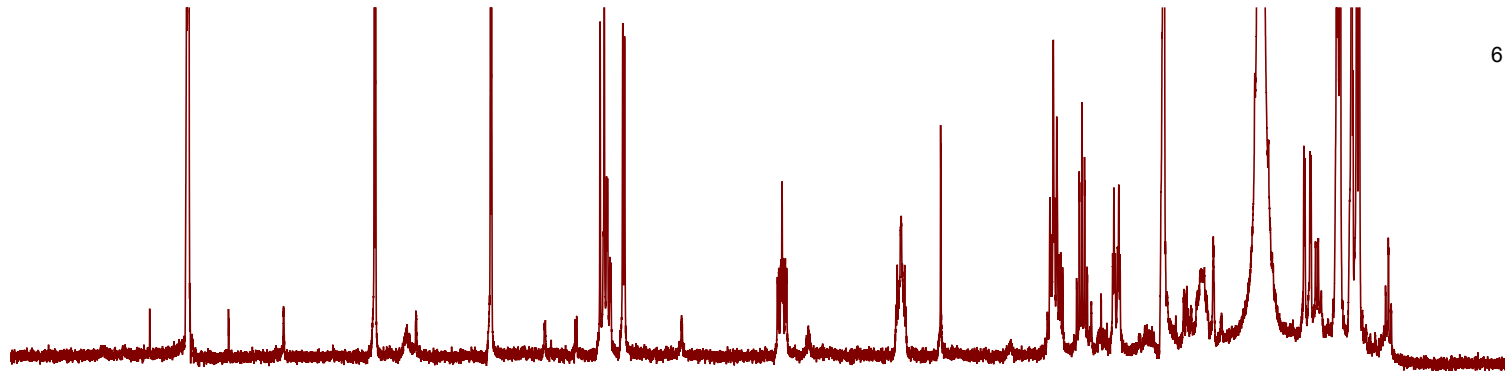HMQC spectrum of 1 in CDCl<sub>3</sub>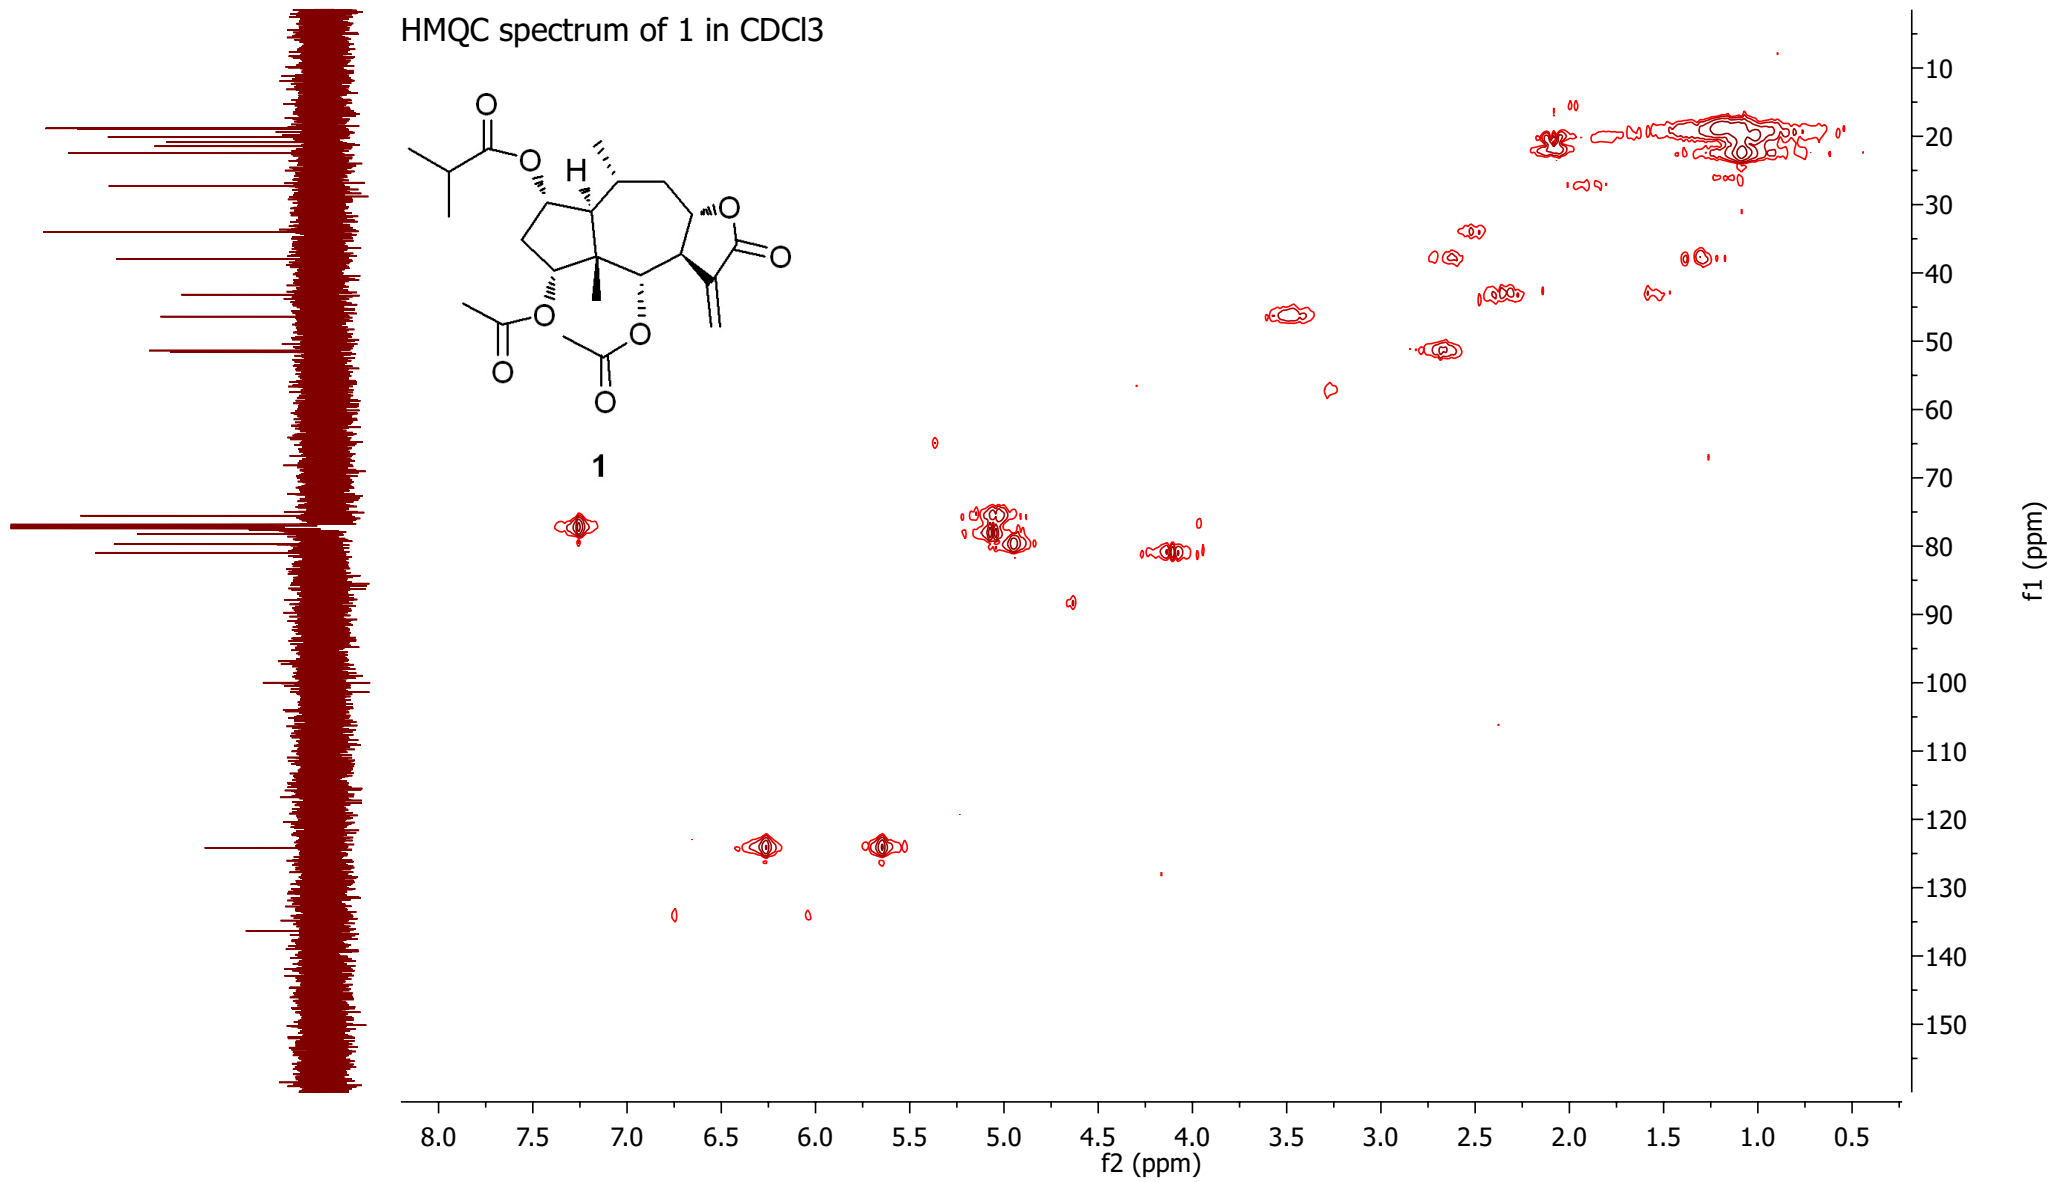

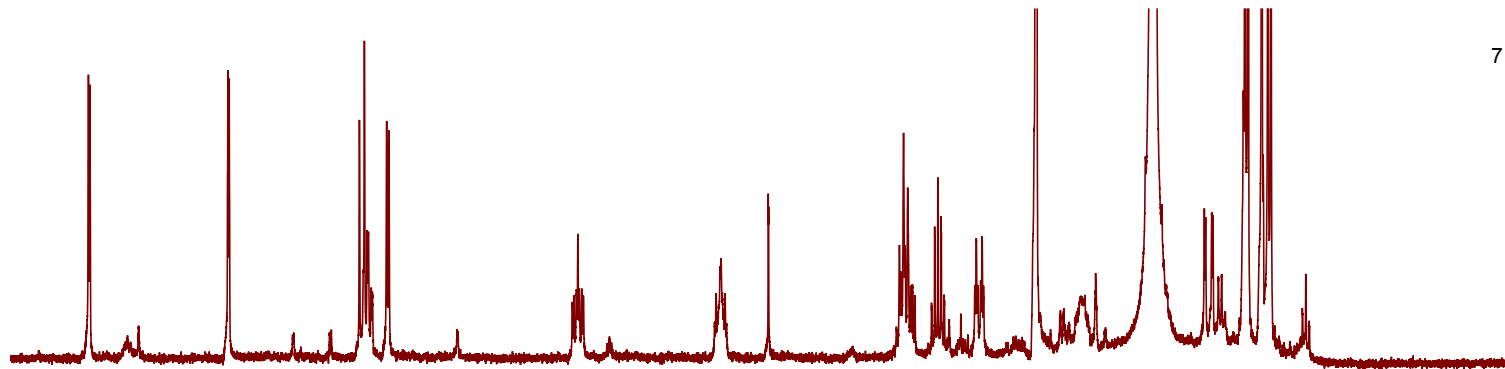NOESY spectrum of 1 in CDCl<sub>3</sub>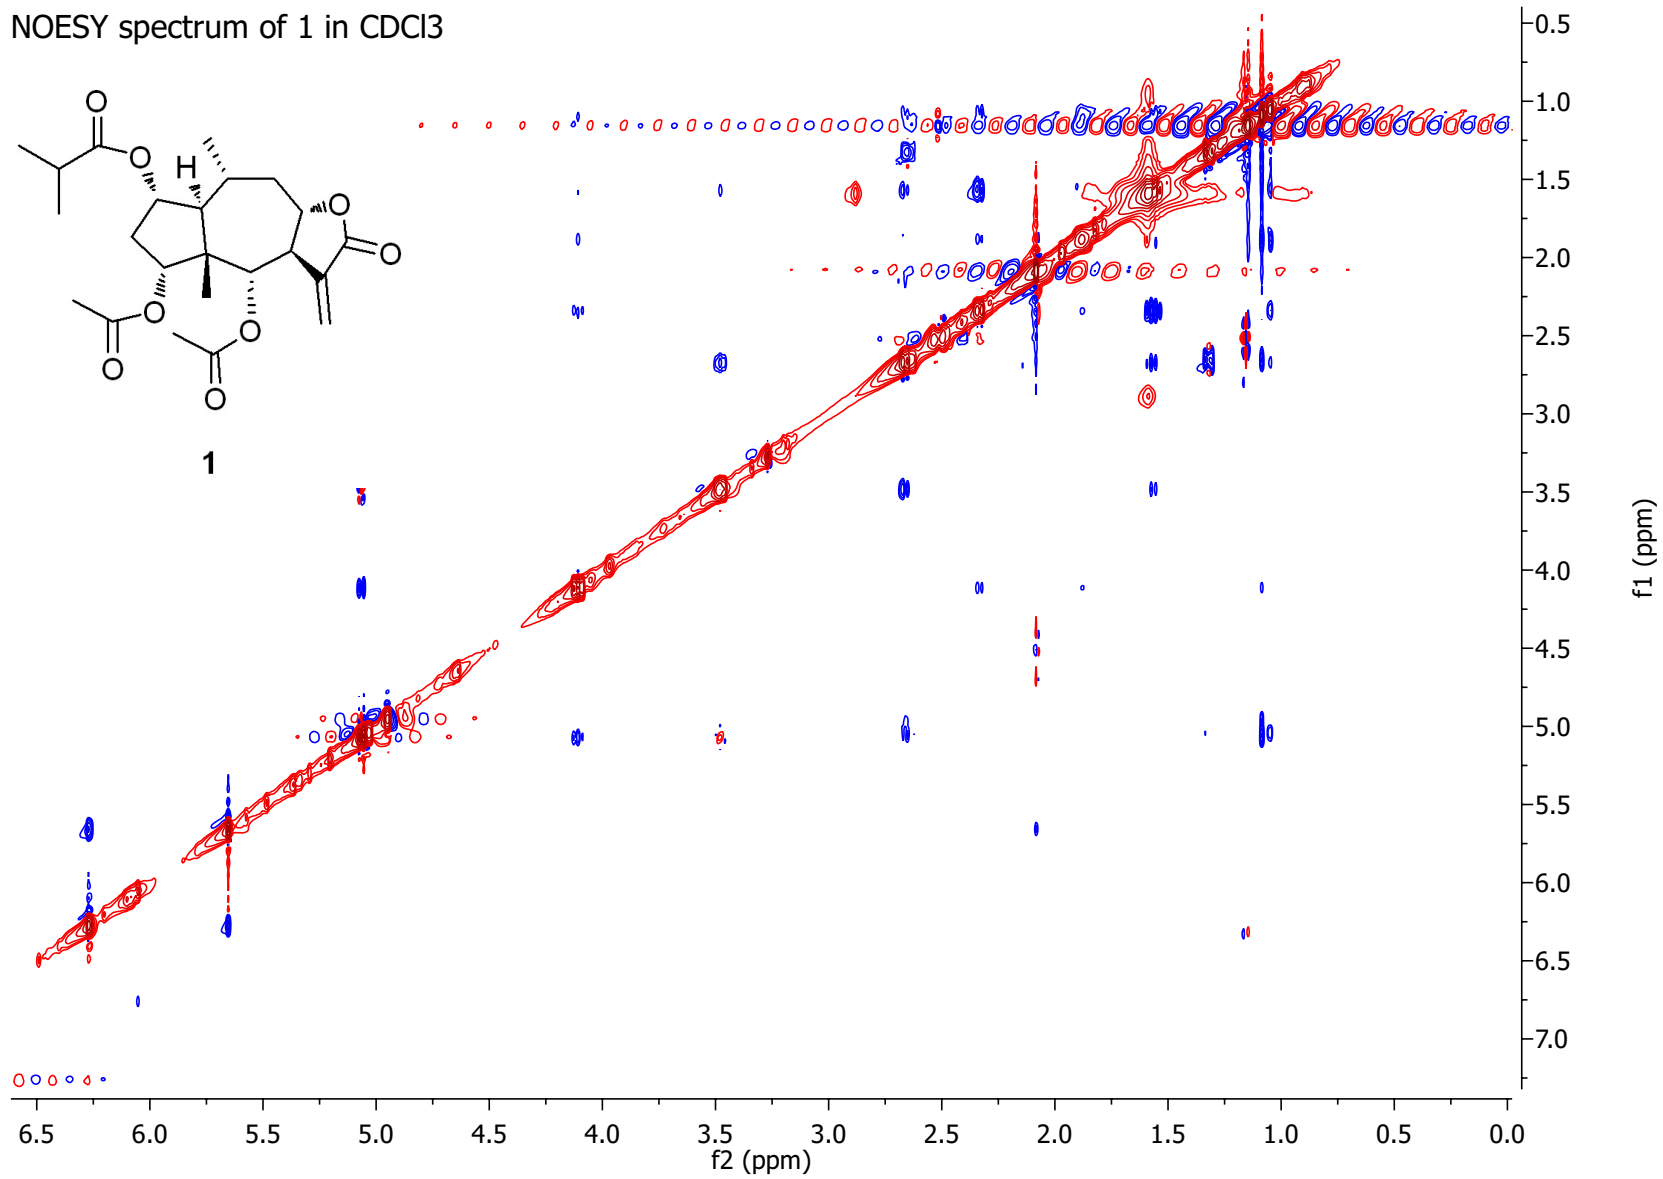

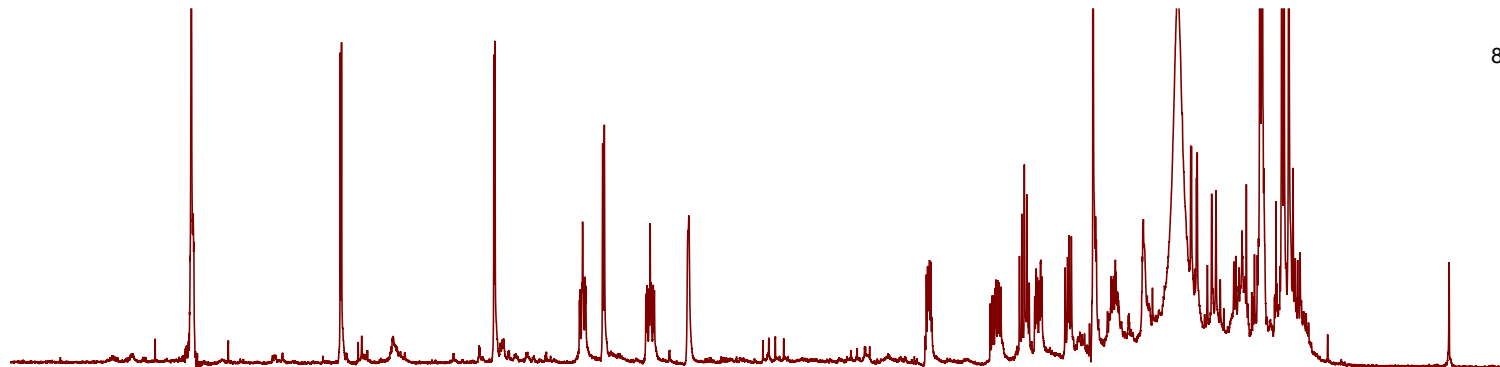COSY spectrum of 2 in CDCl<sub>3</sub>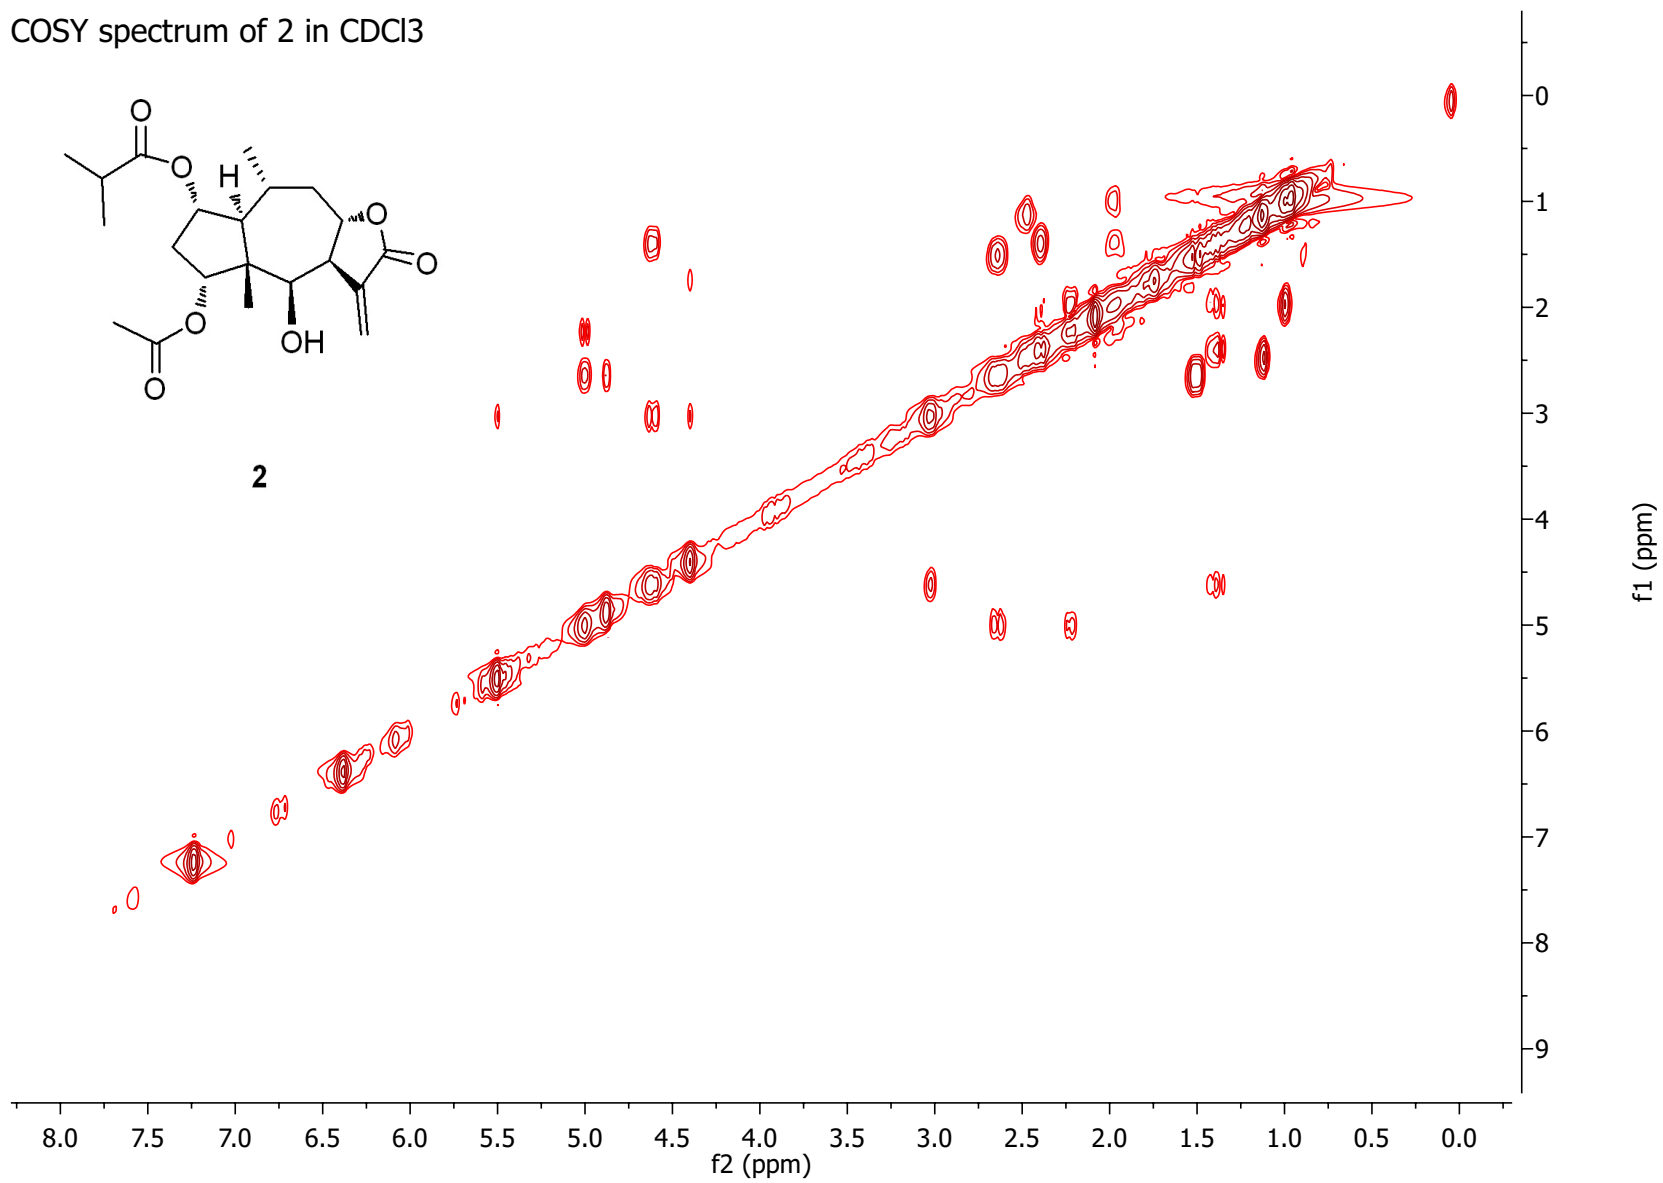



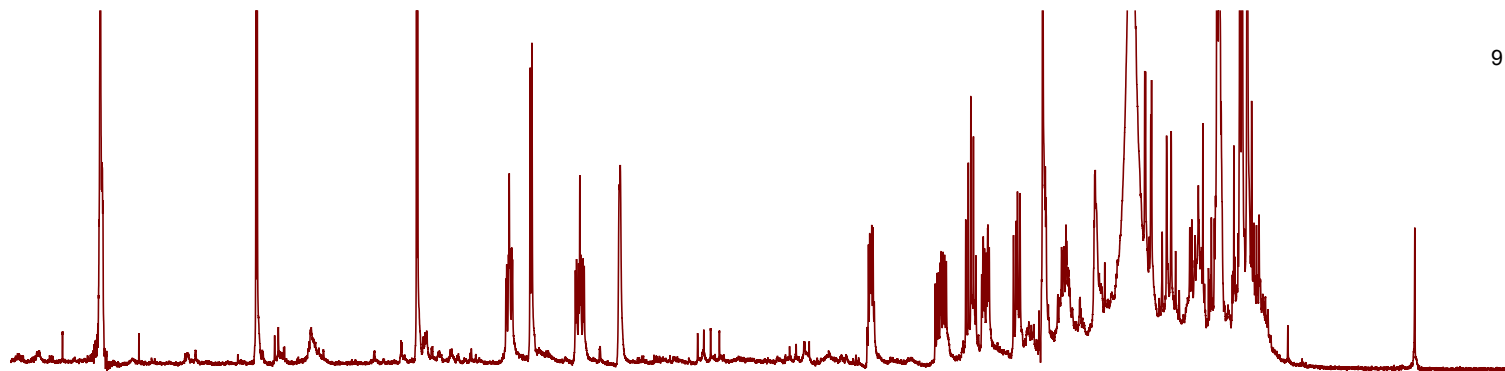HMQC spectrum of 2 in CDCl<sub>3</sub>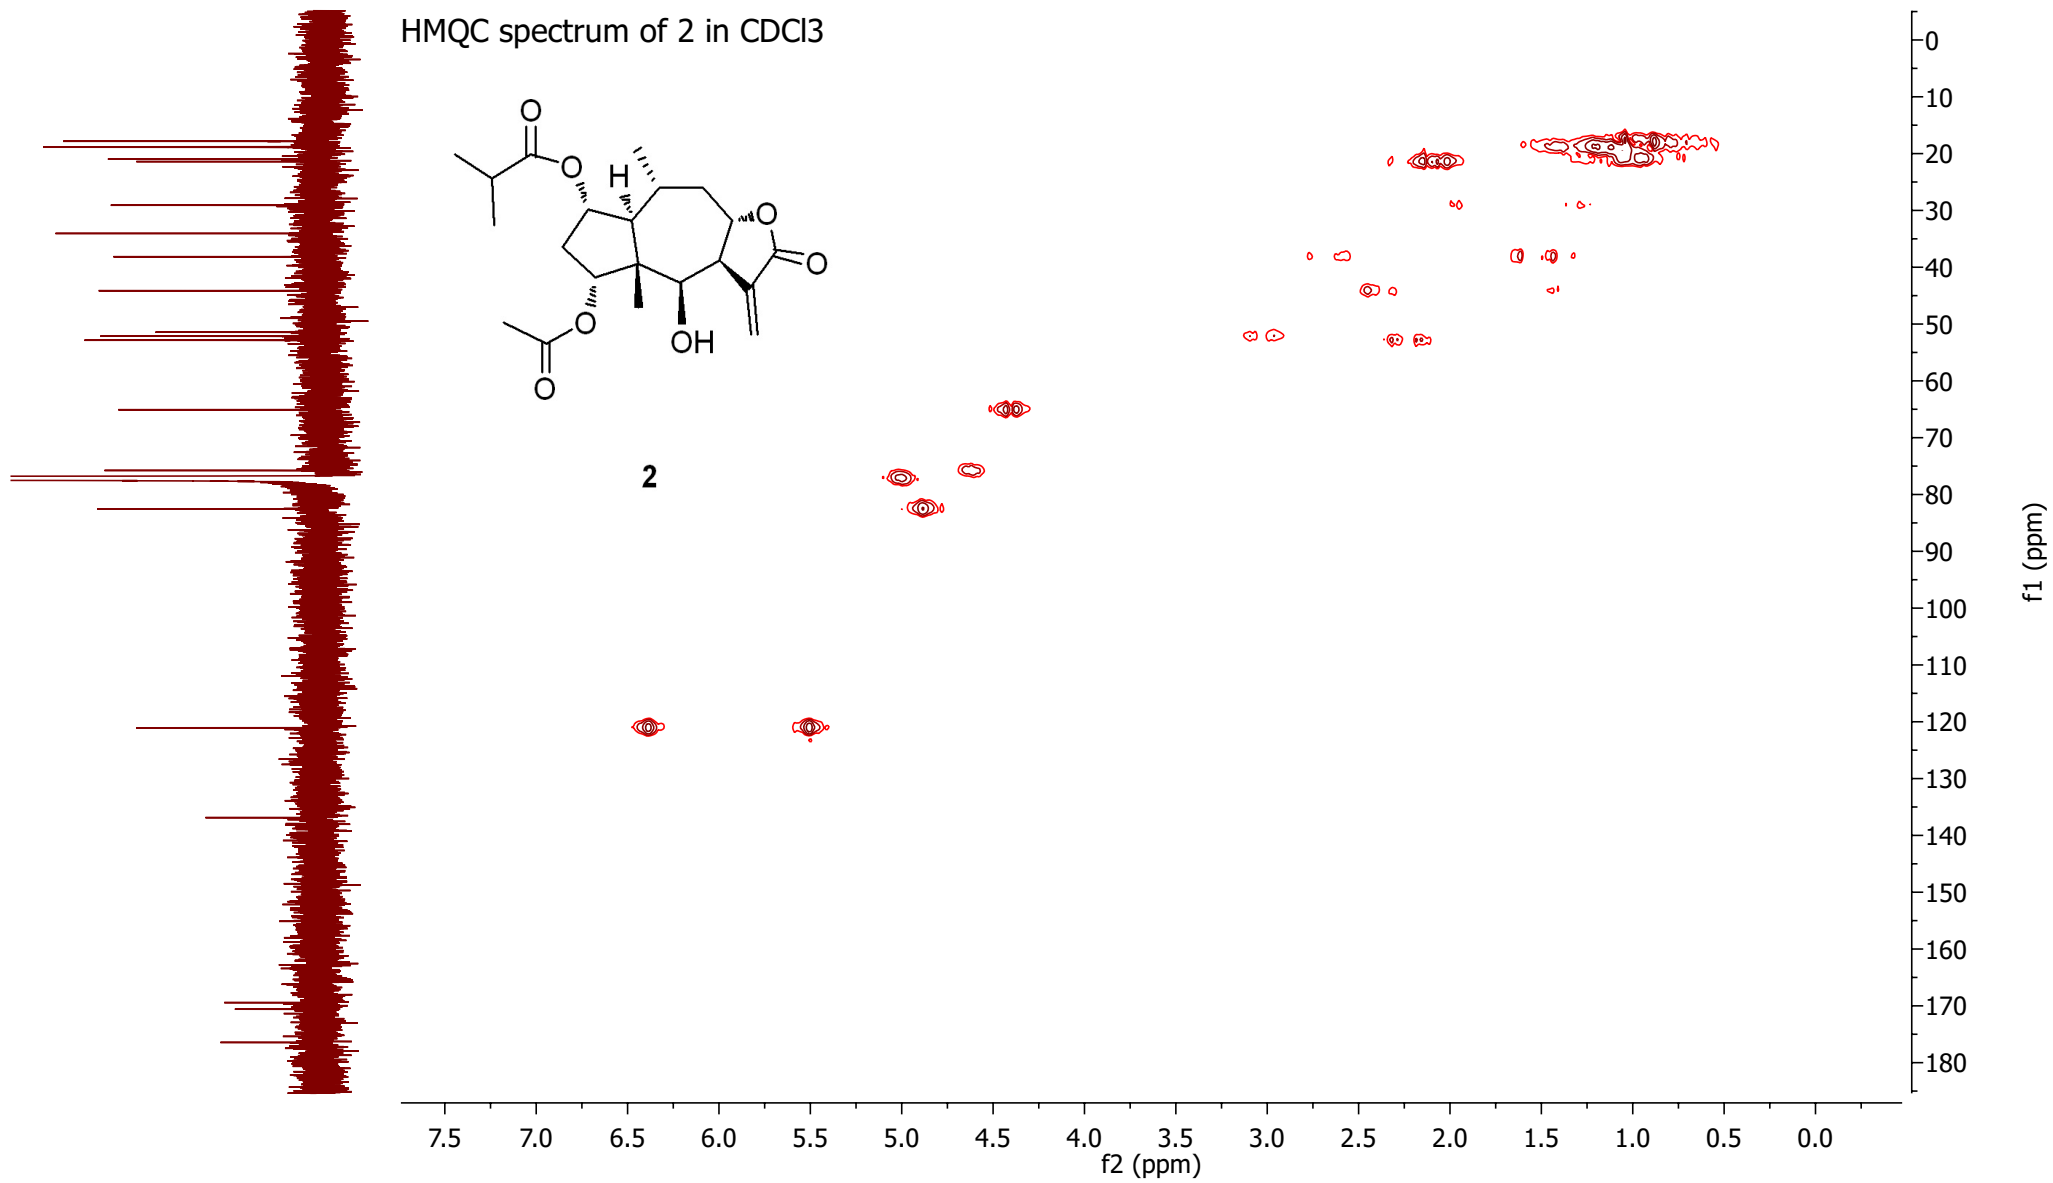

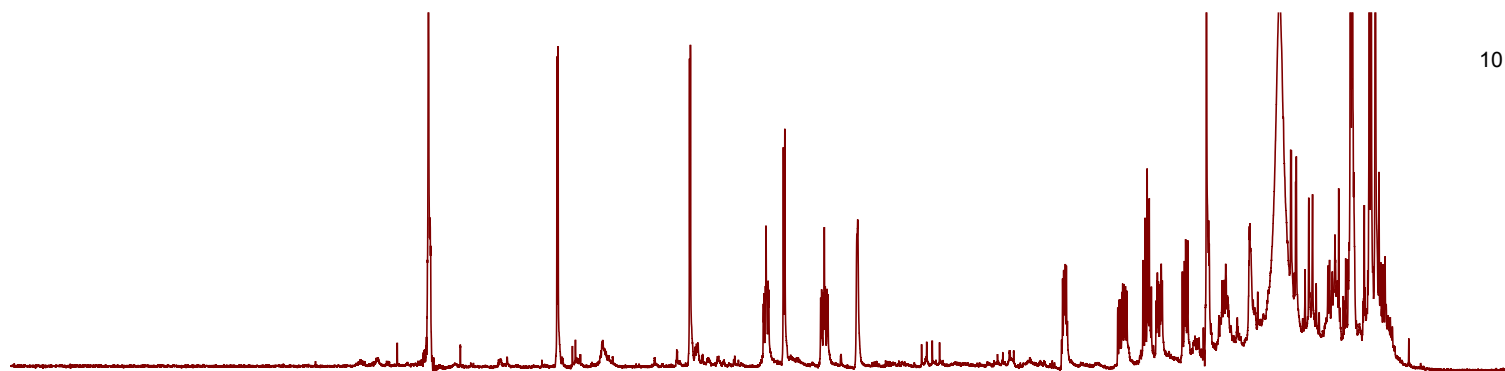HMBC spectrum of 2 in CDCl<sub>3</sub>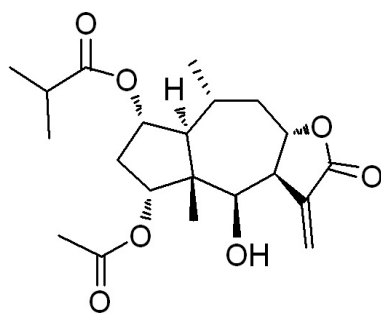

2

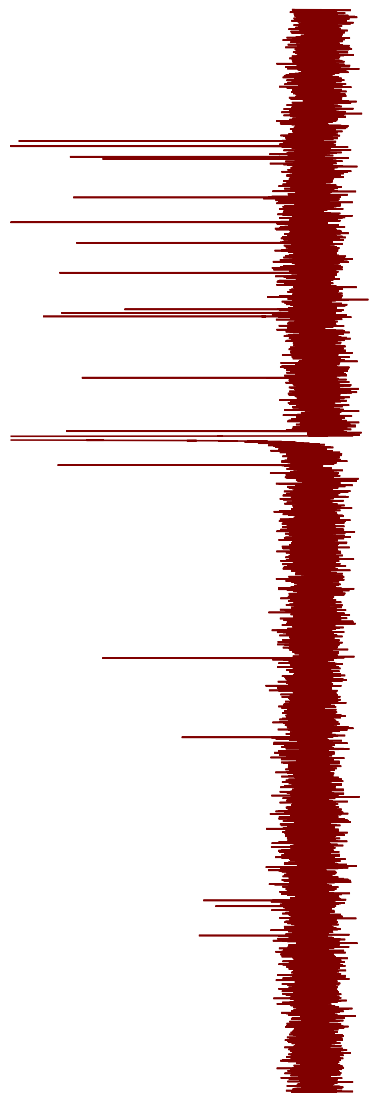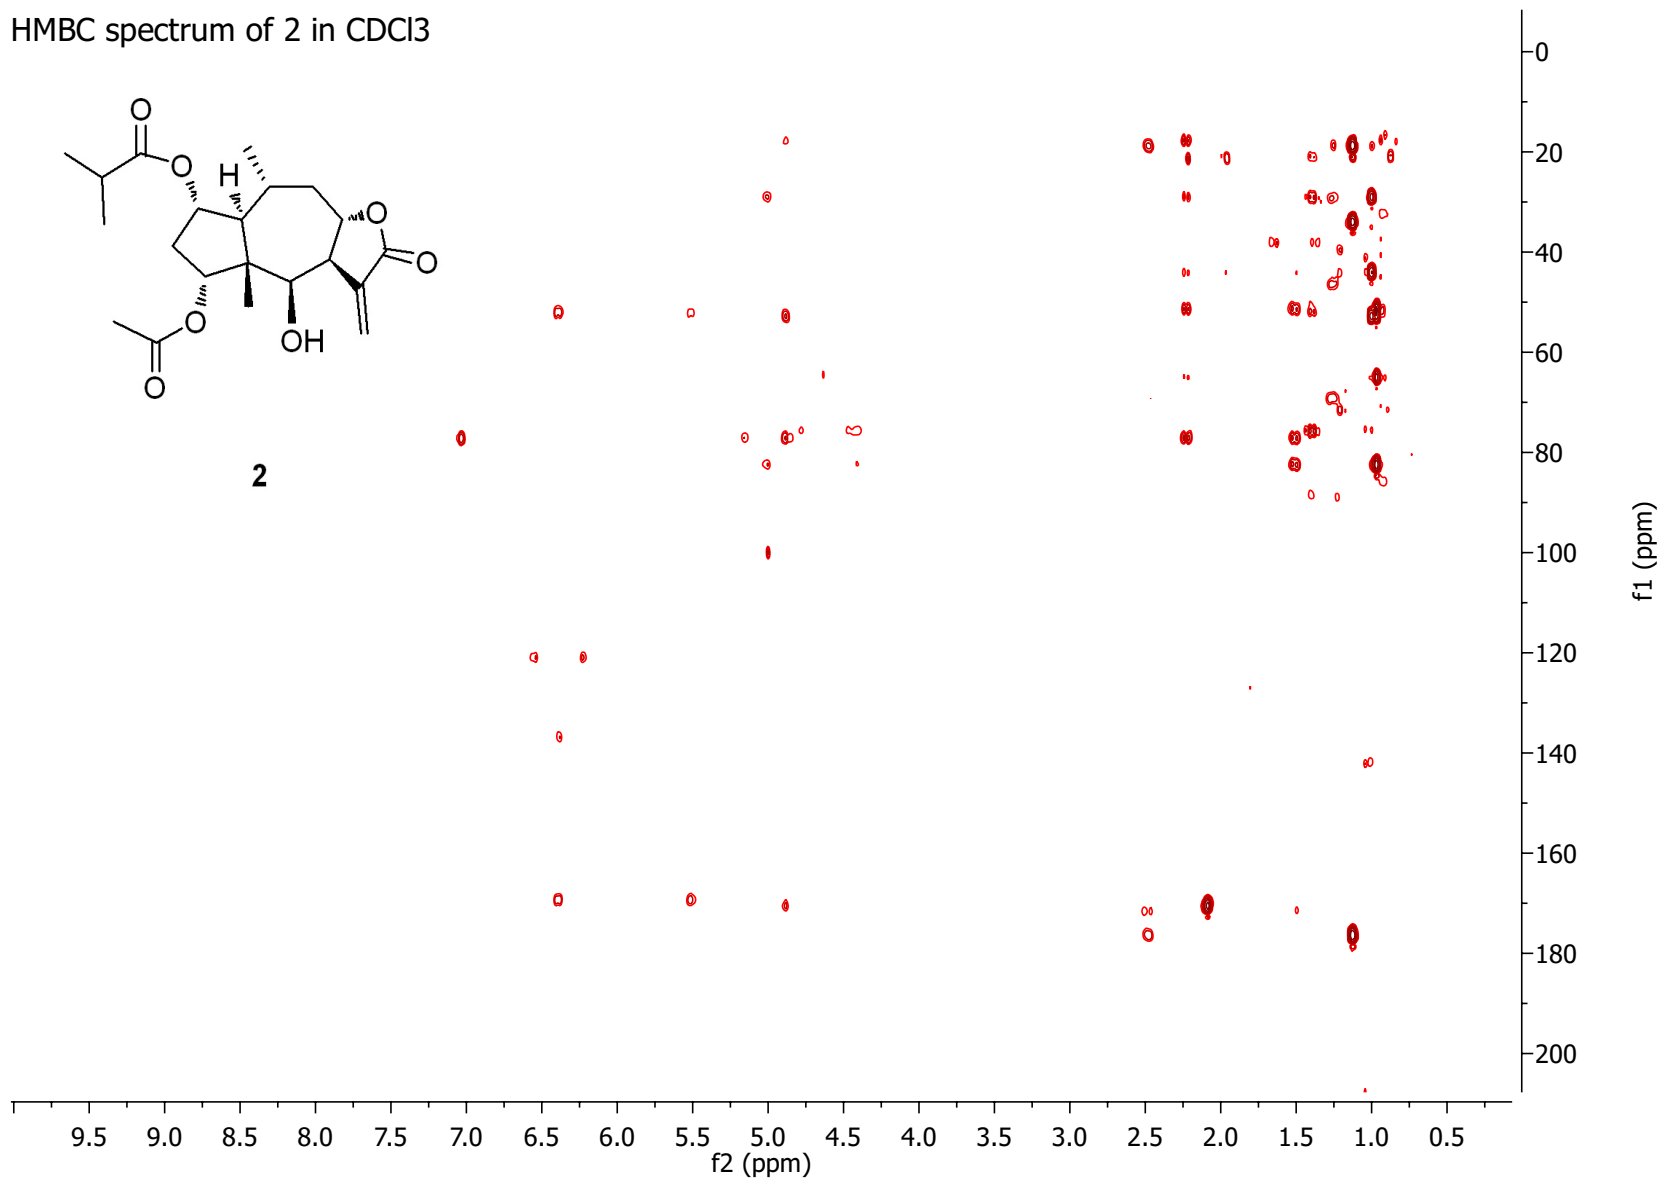

<sup>1</sup>H NMR spectrum of 2 in CDCl<sub>3</sub>

11

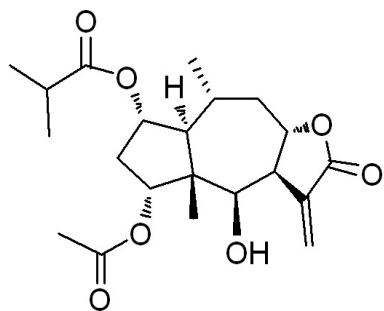

2

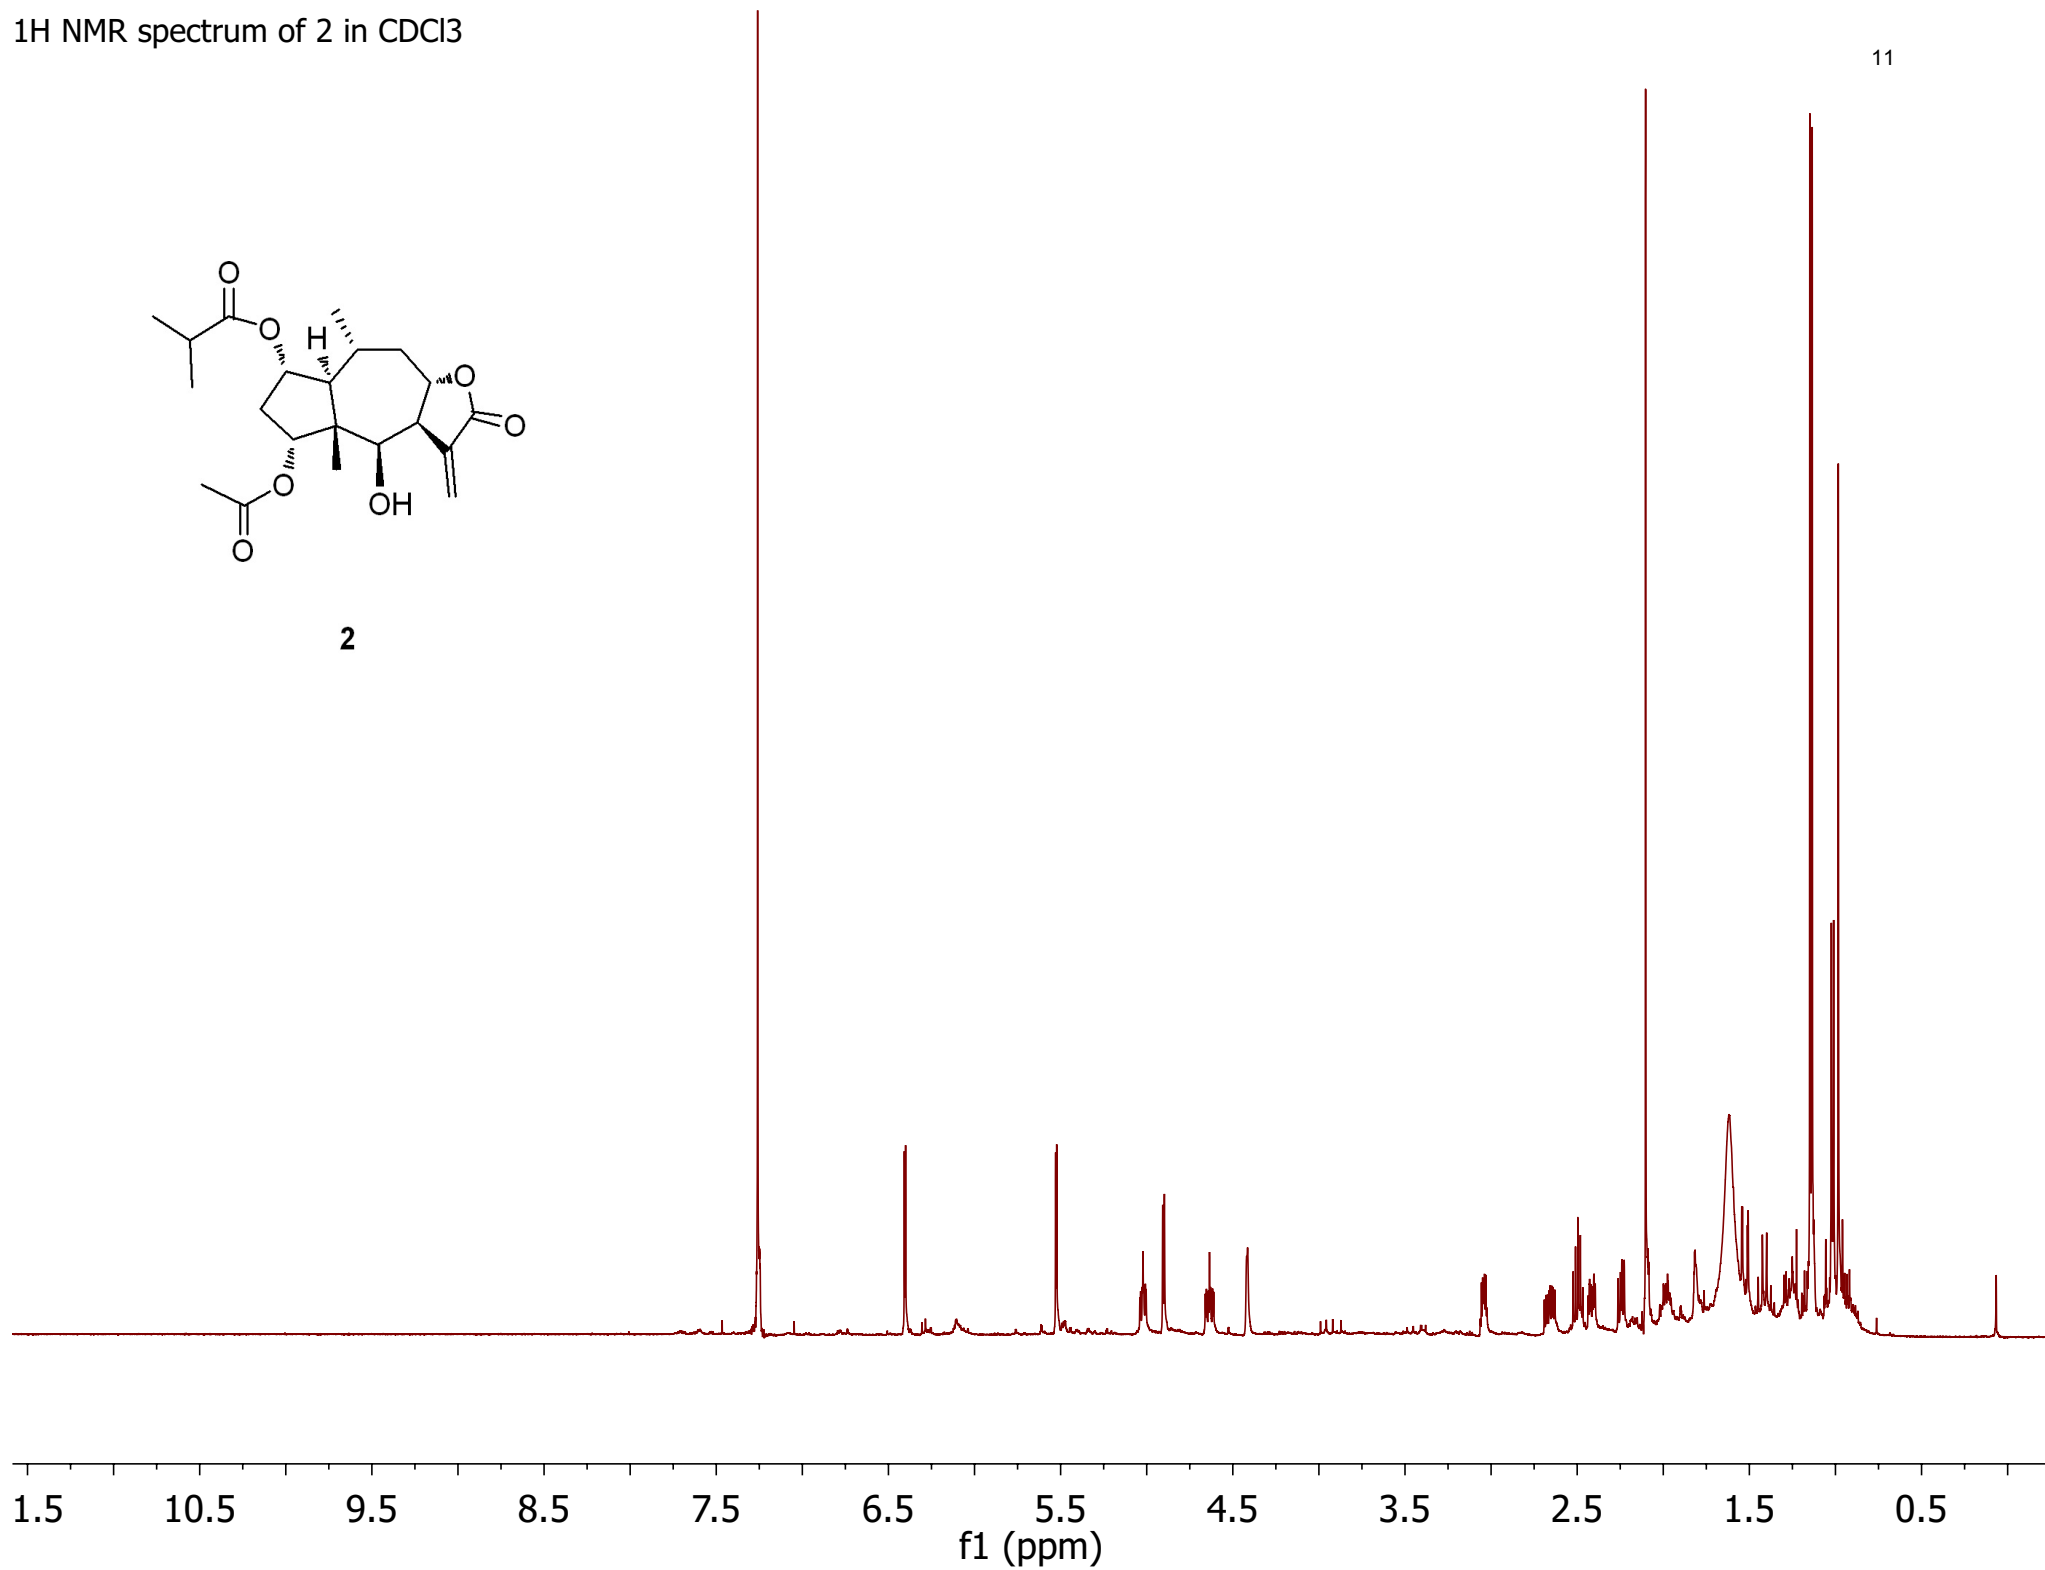

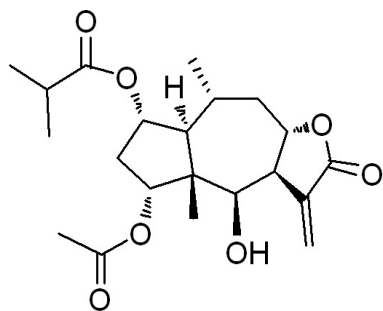

2

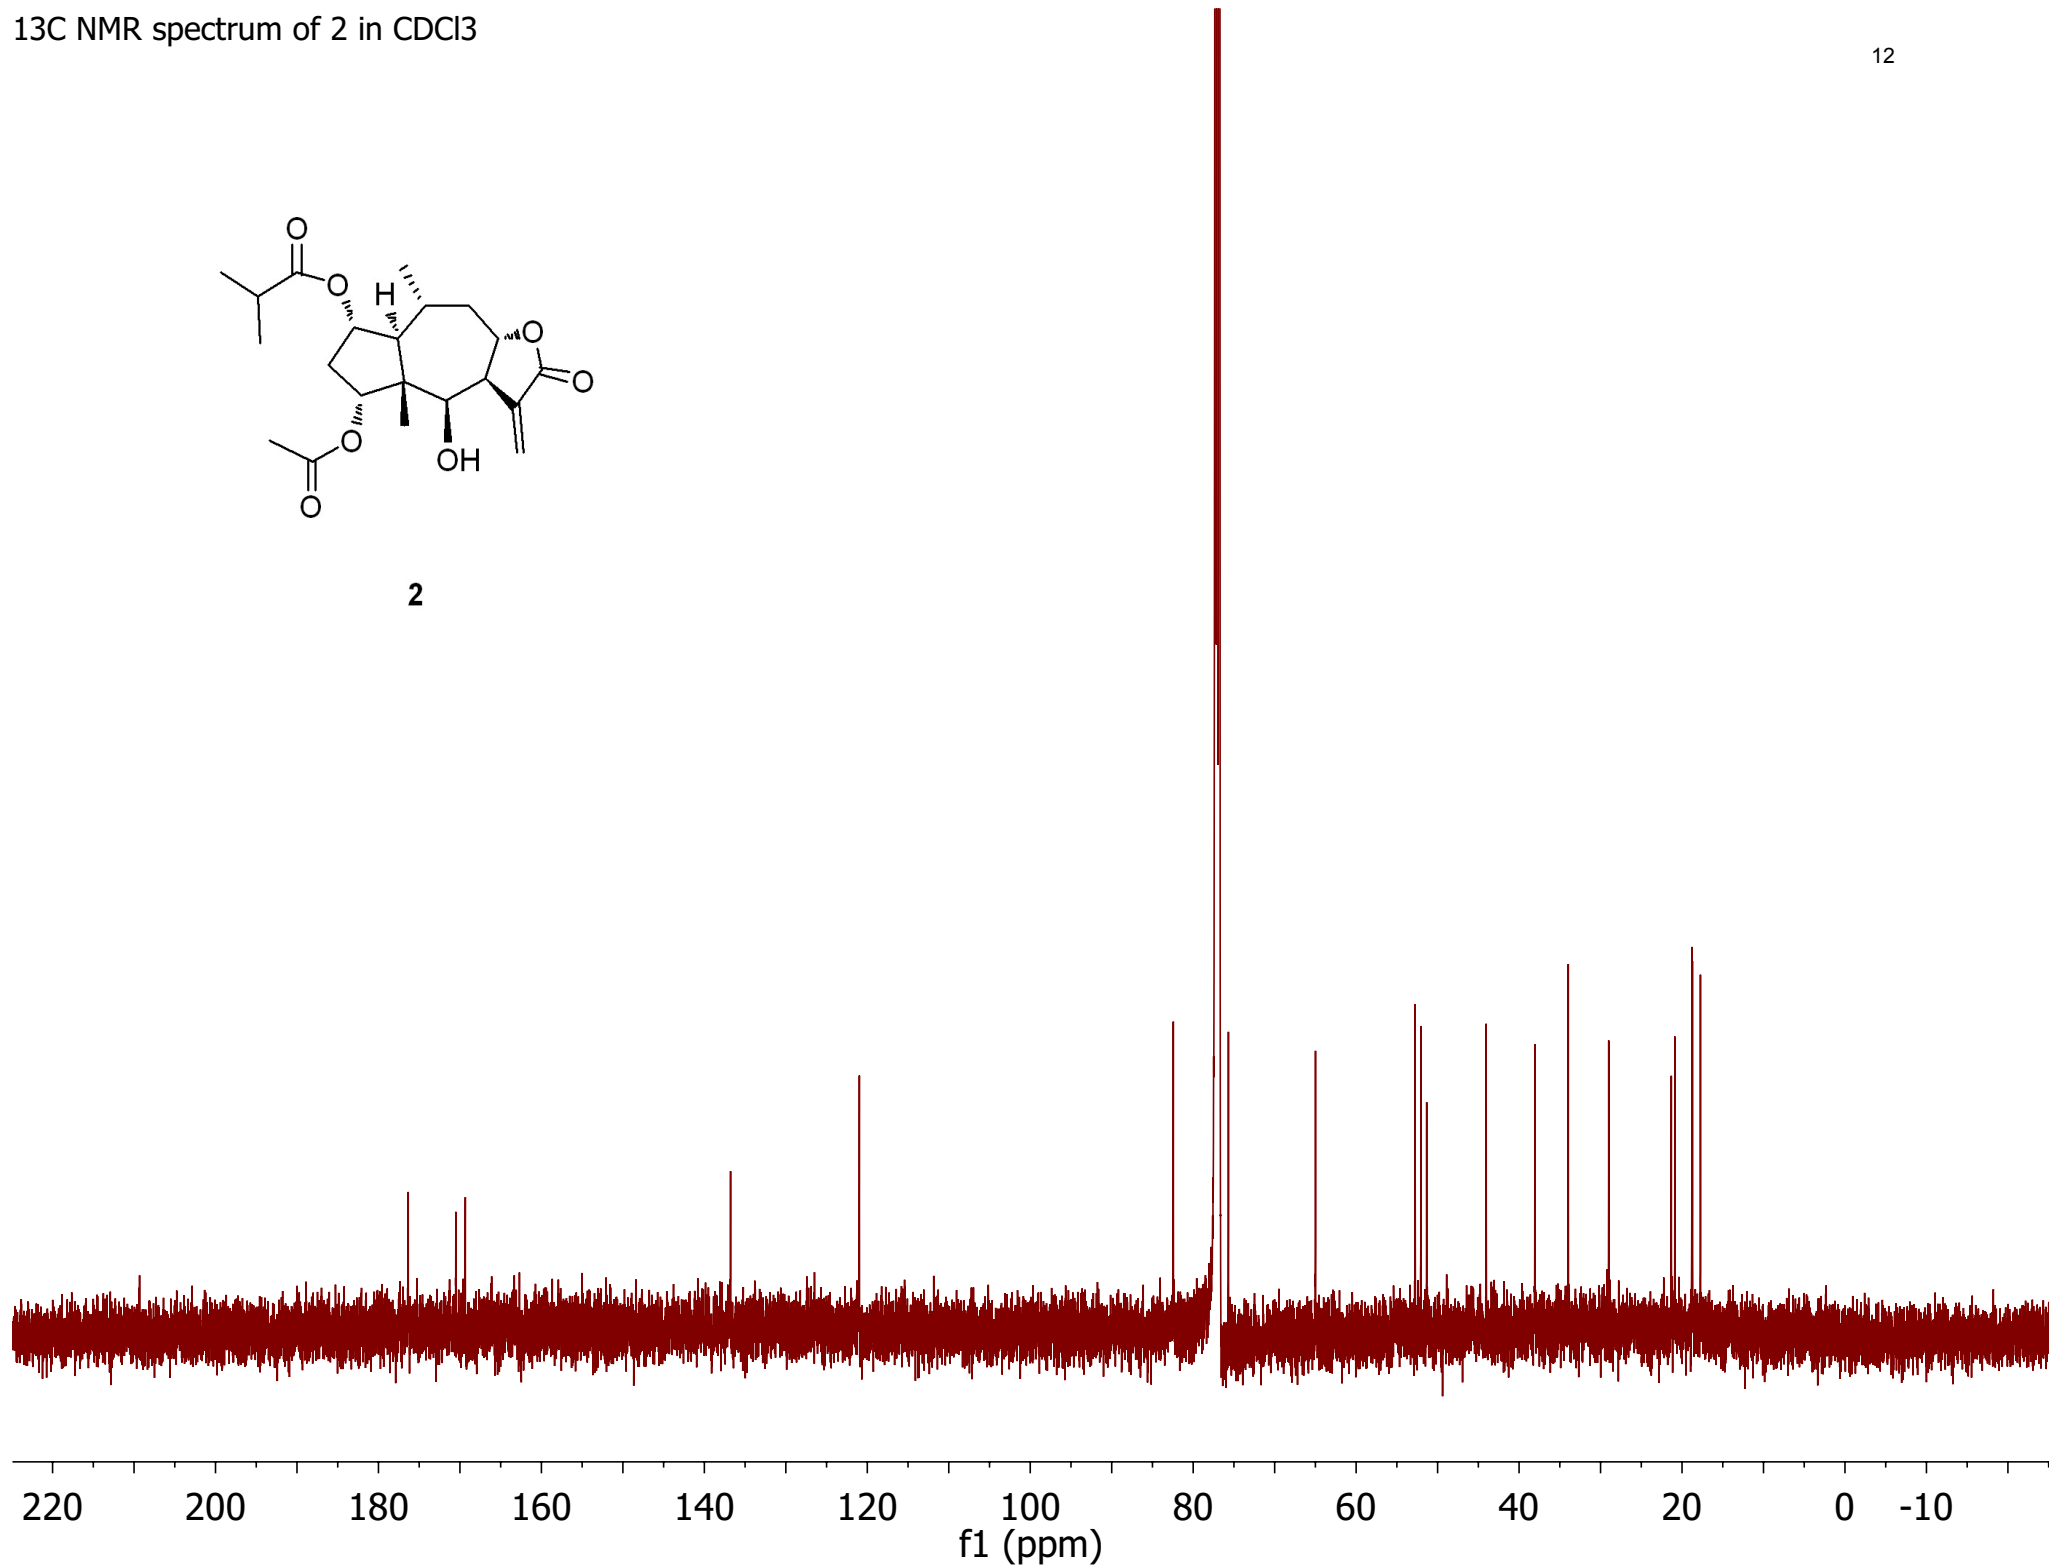

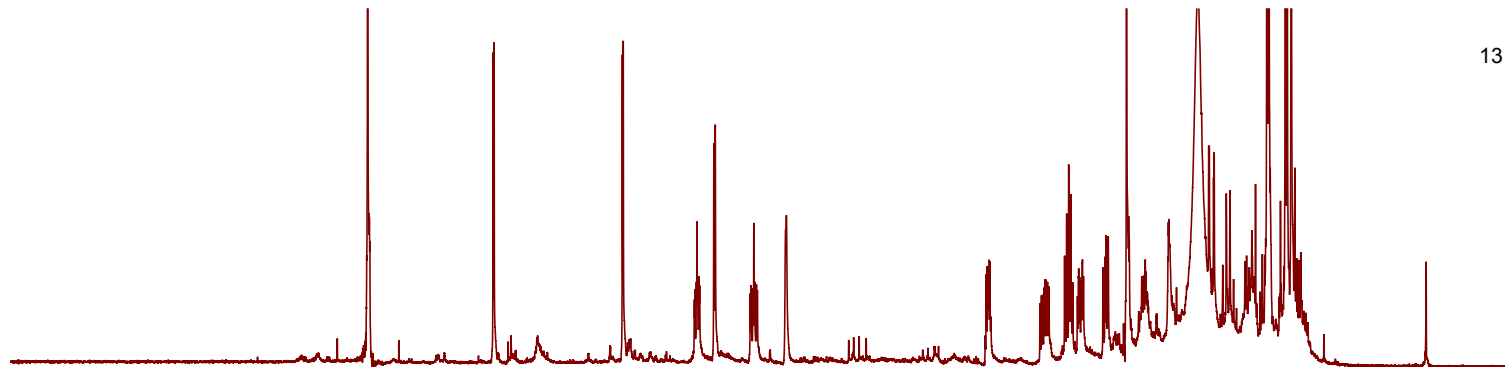NOESY spectrum of 2 in CDCl<sub>3</sub>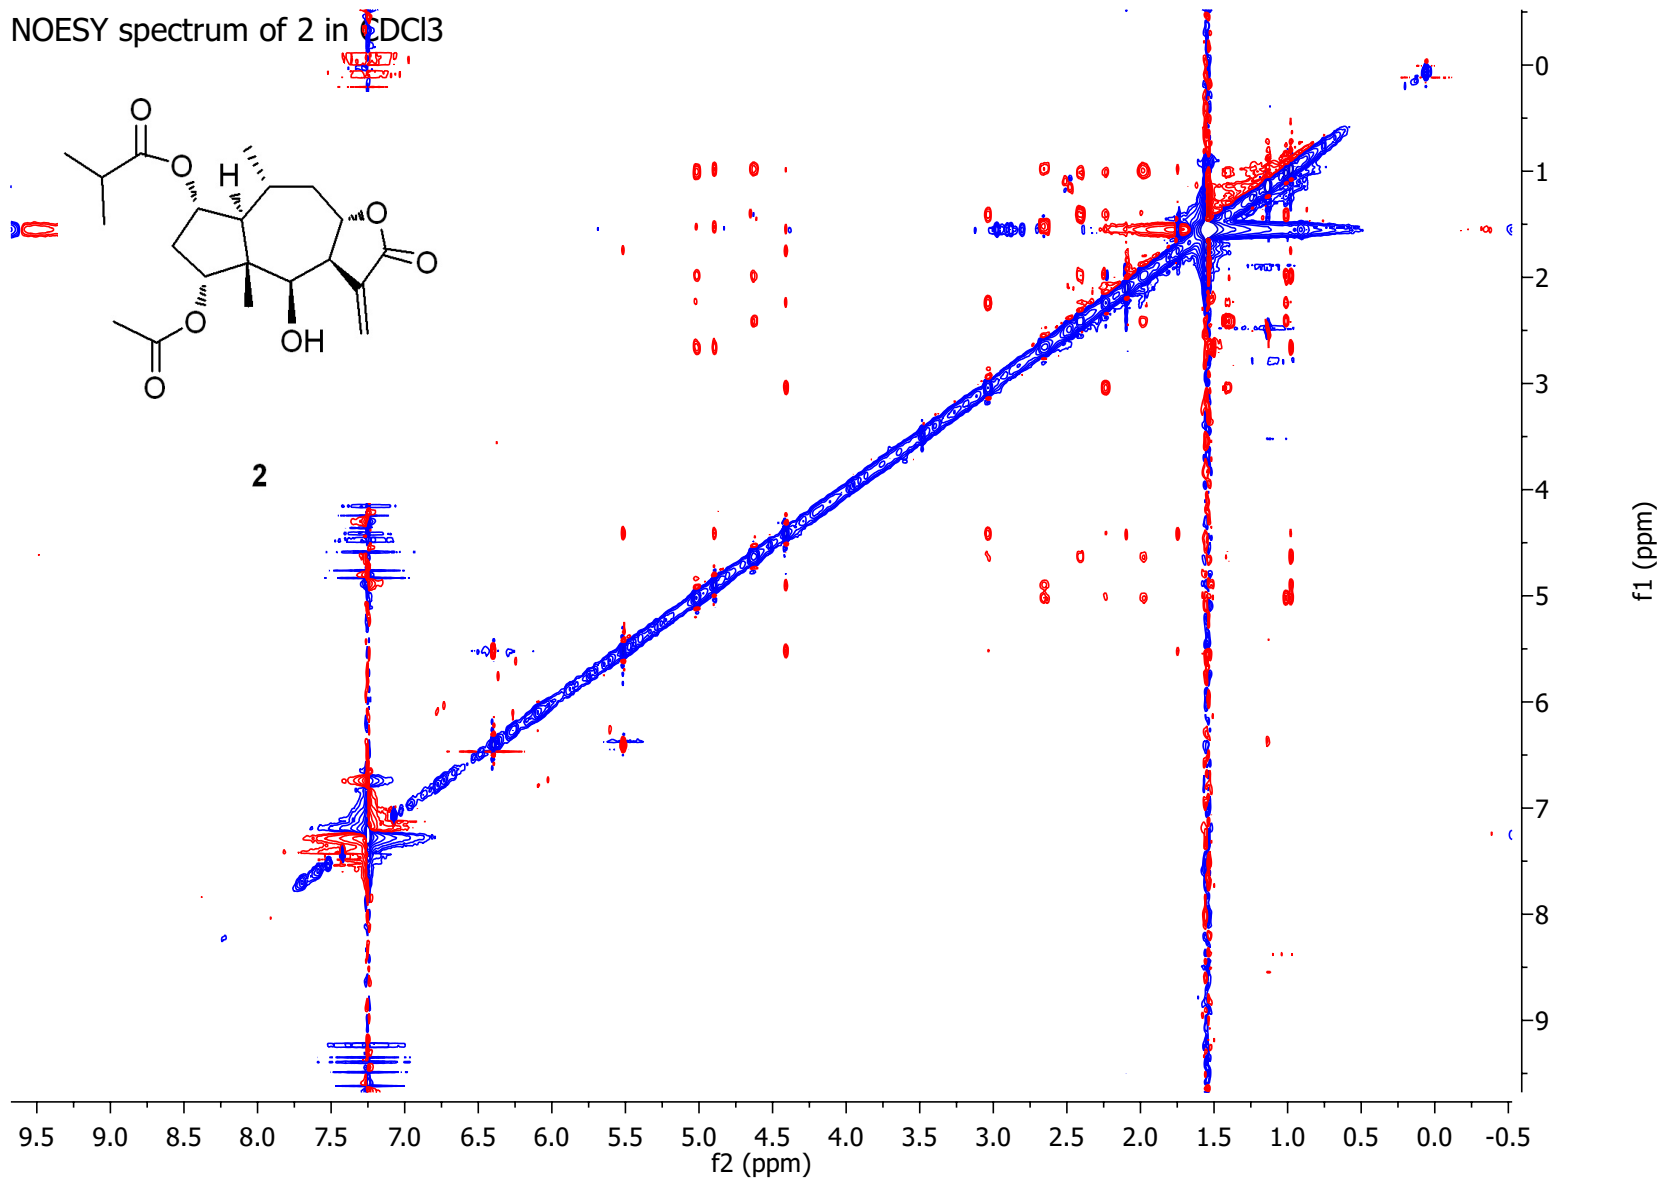

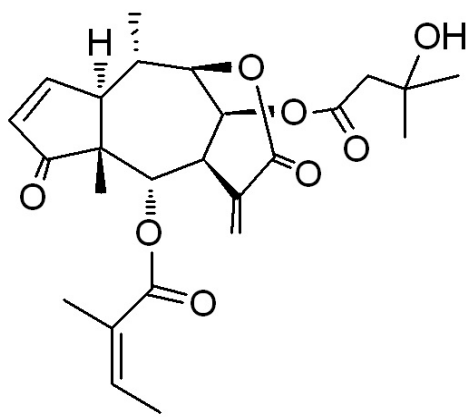

3

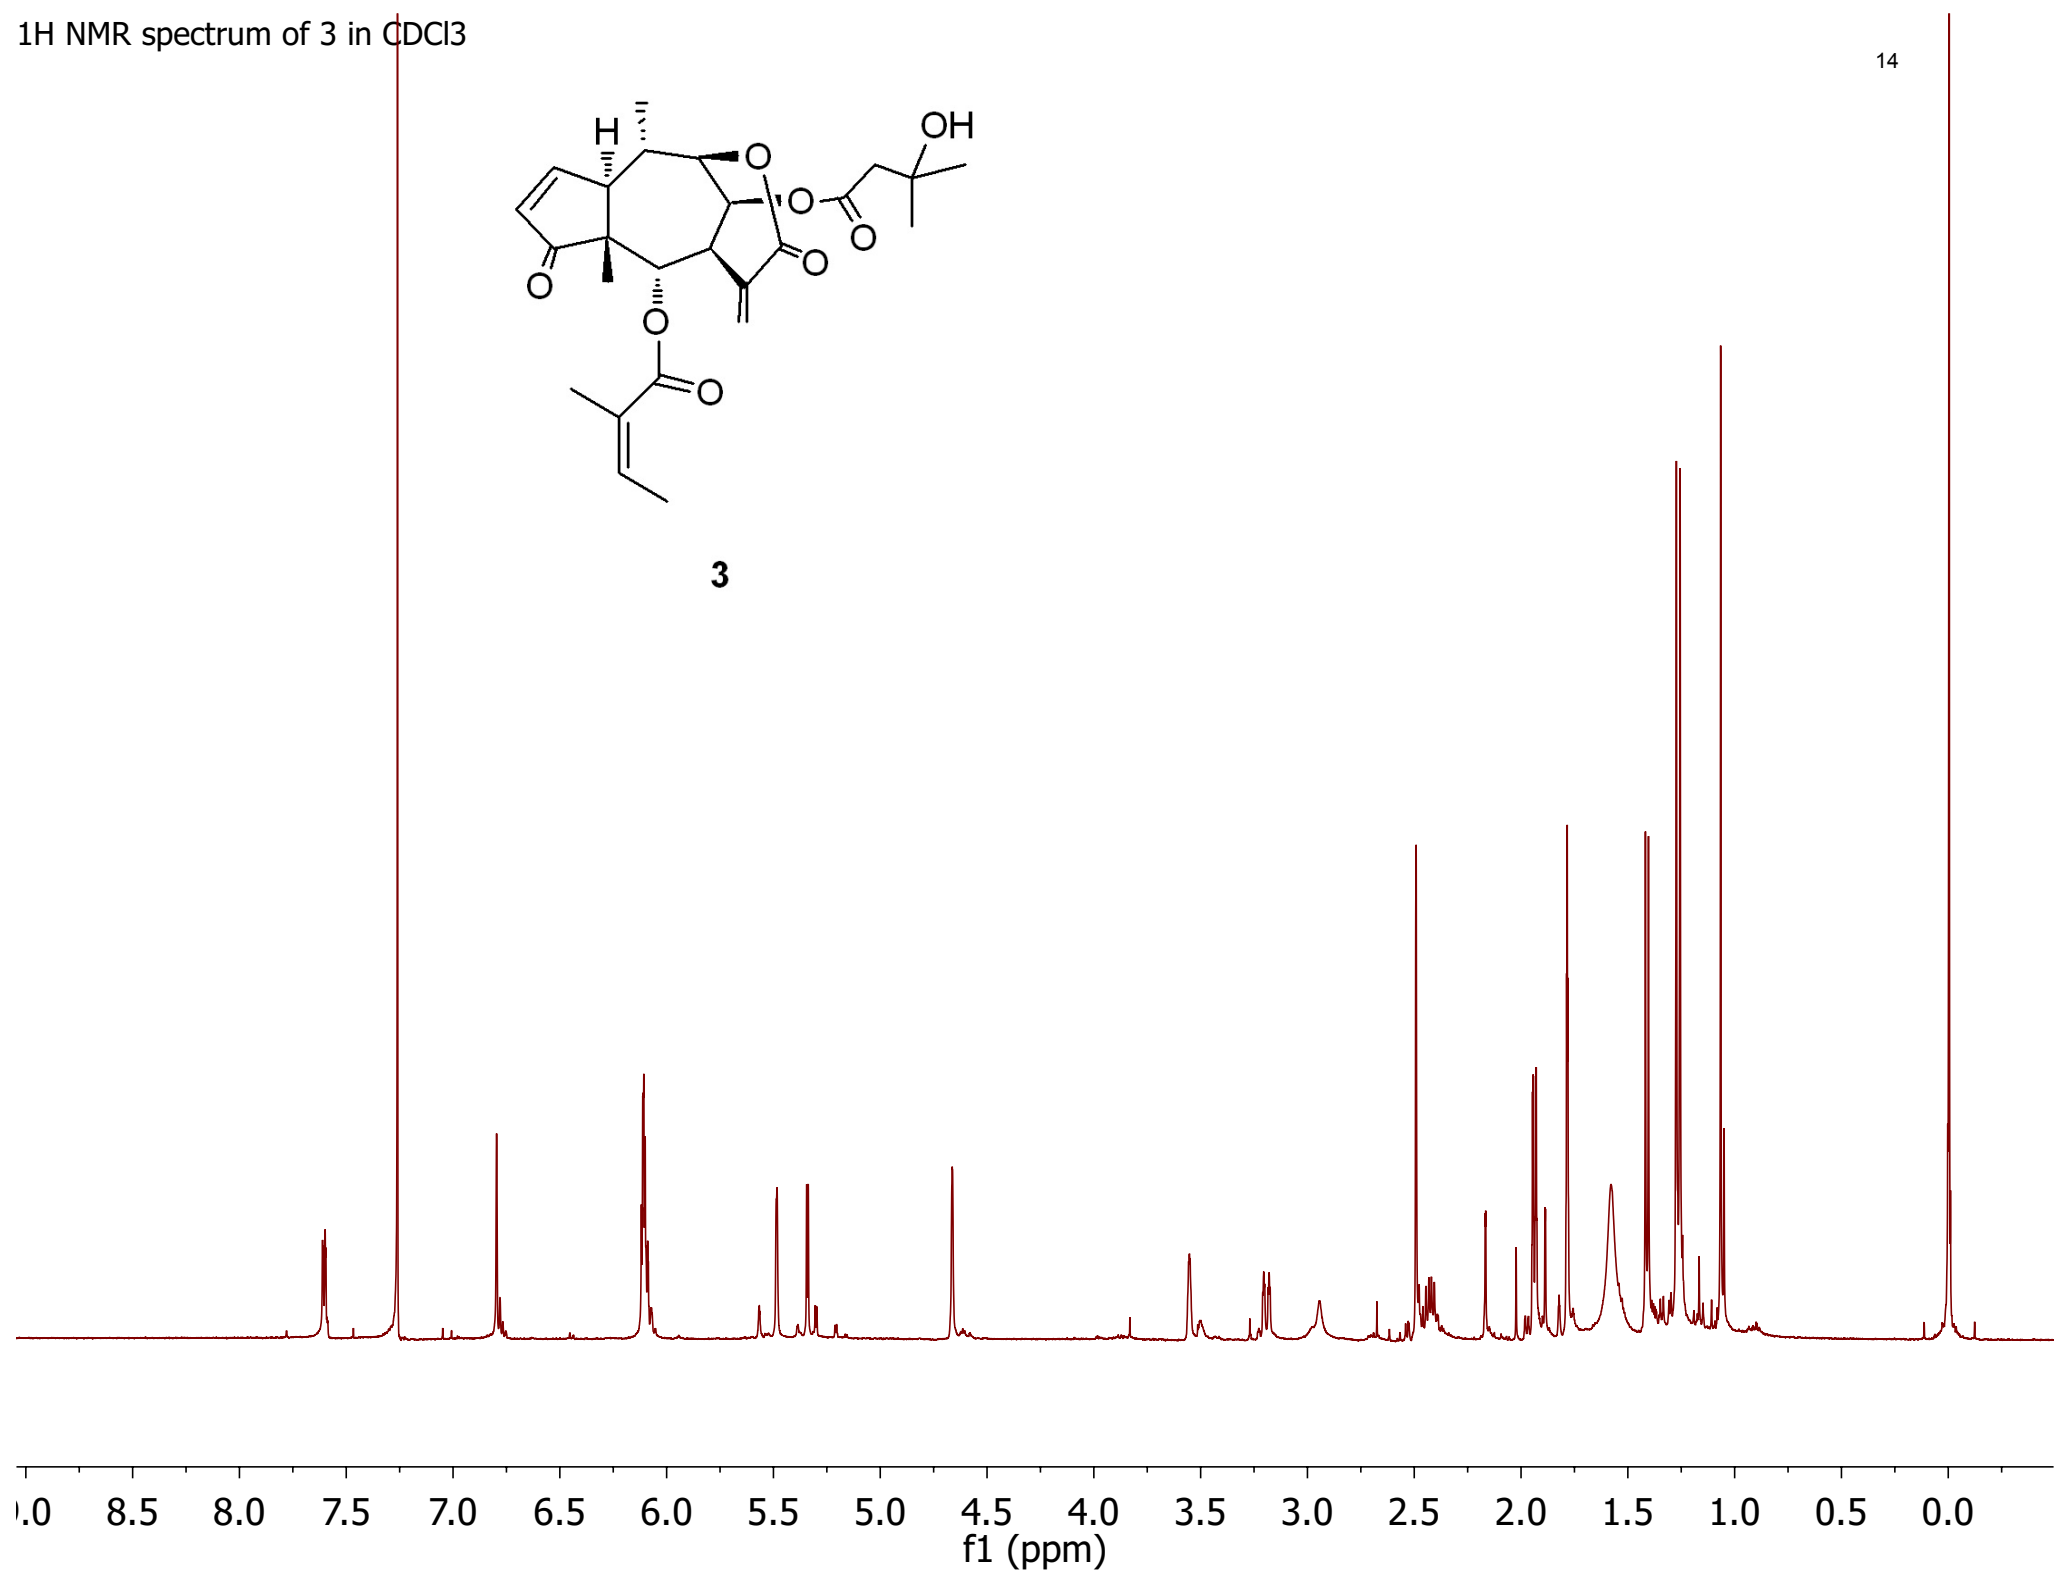

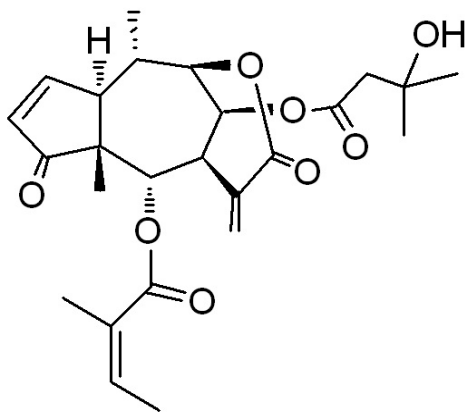

**3**

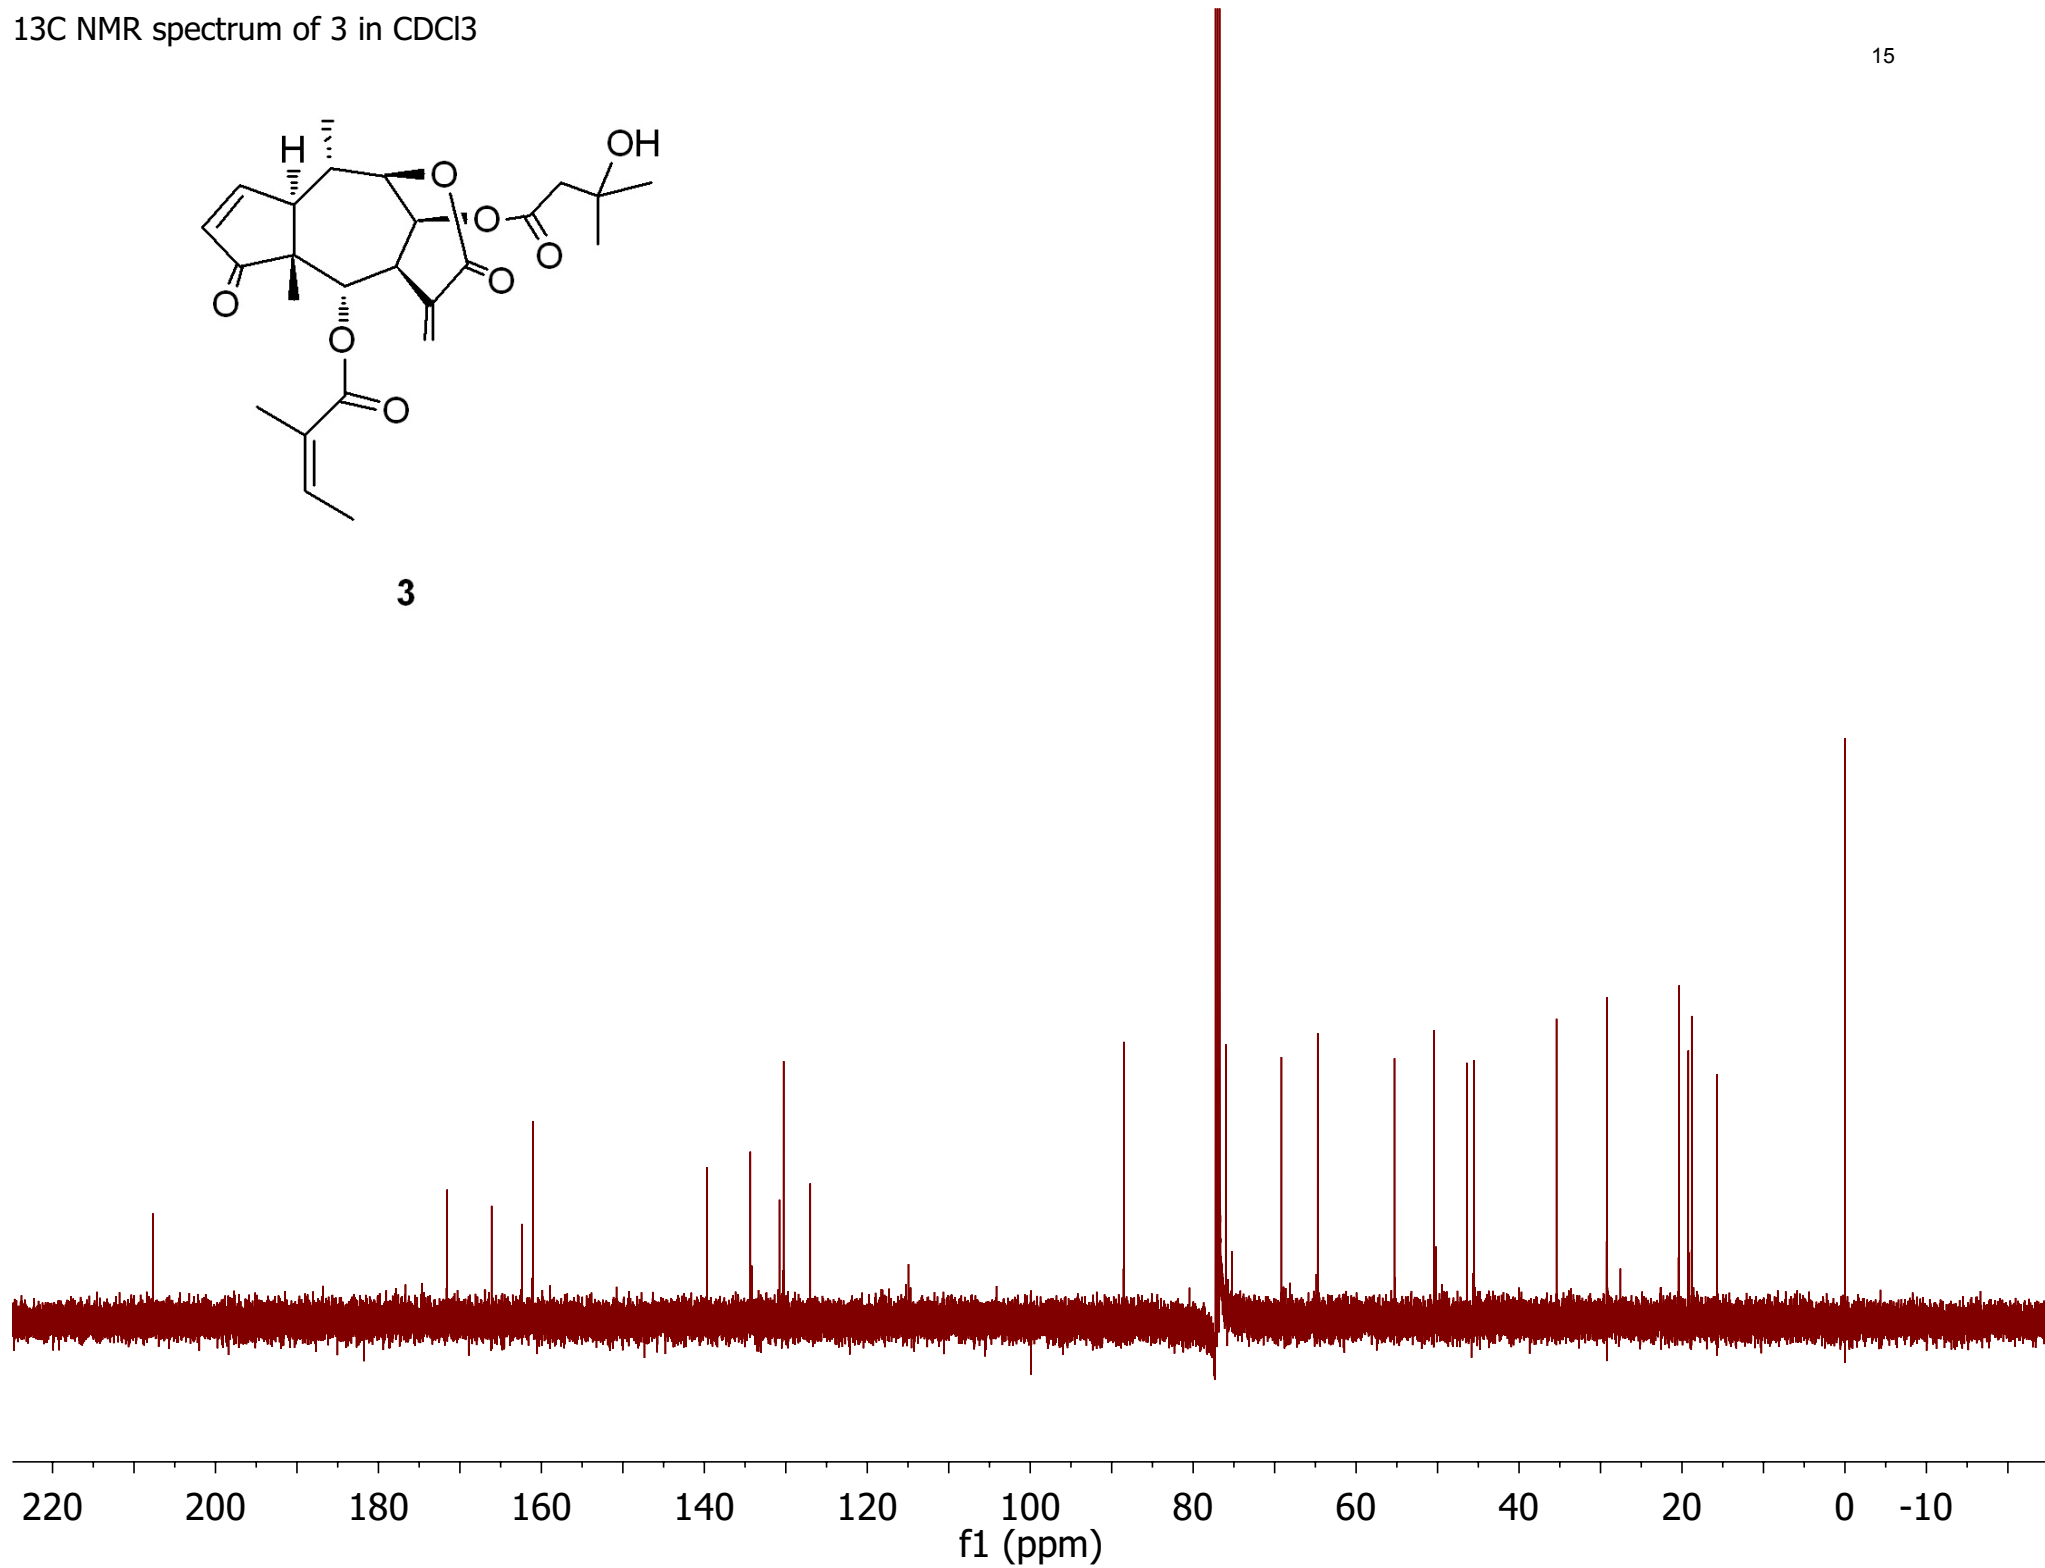

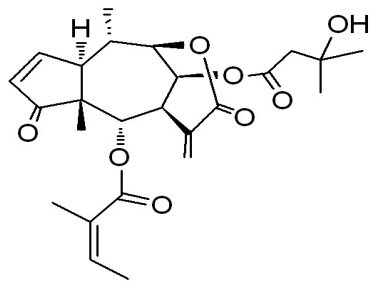

3

16

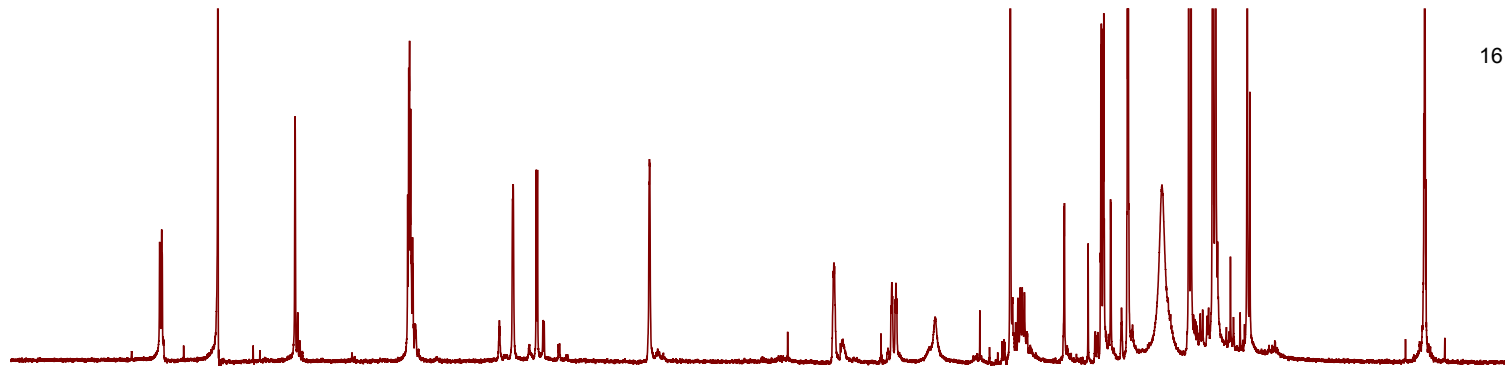

NOESY spectrum of 3 in CDCl3

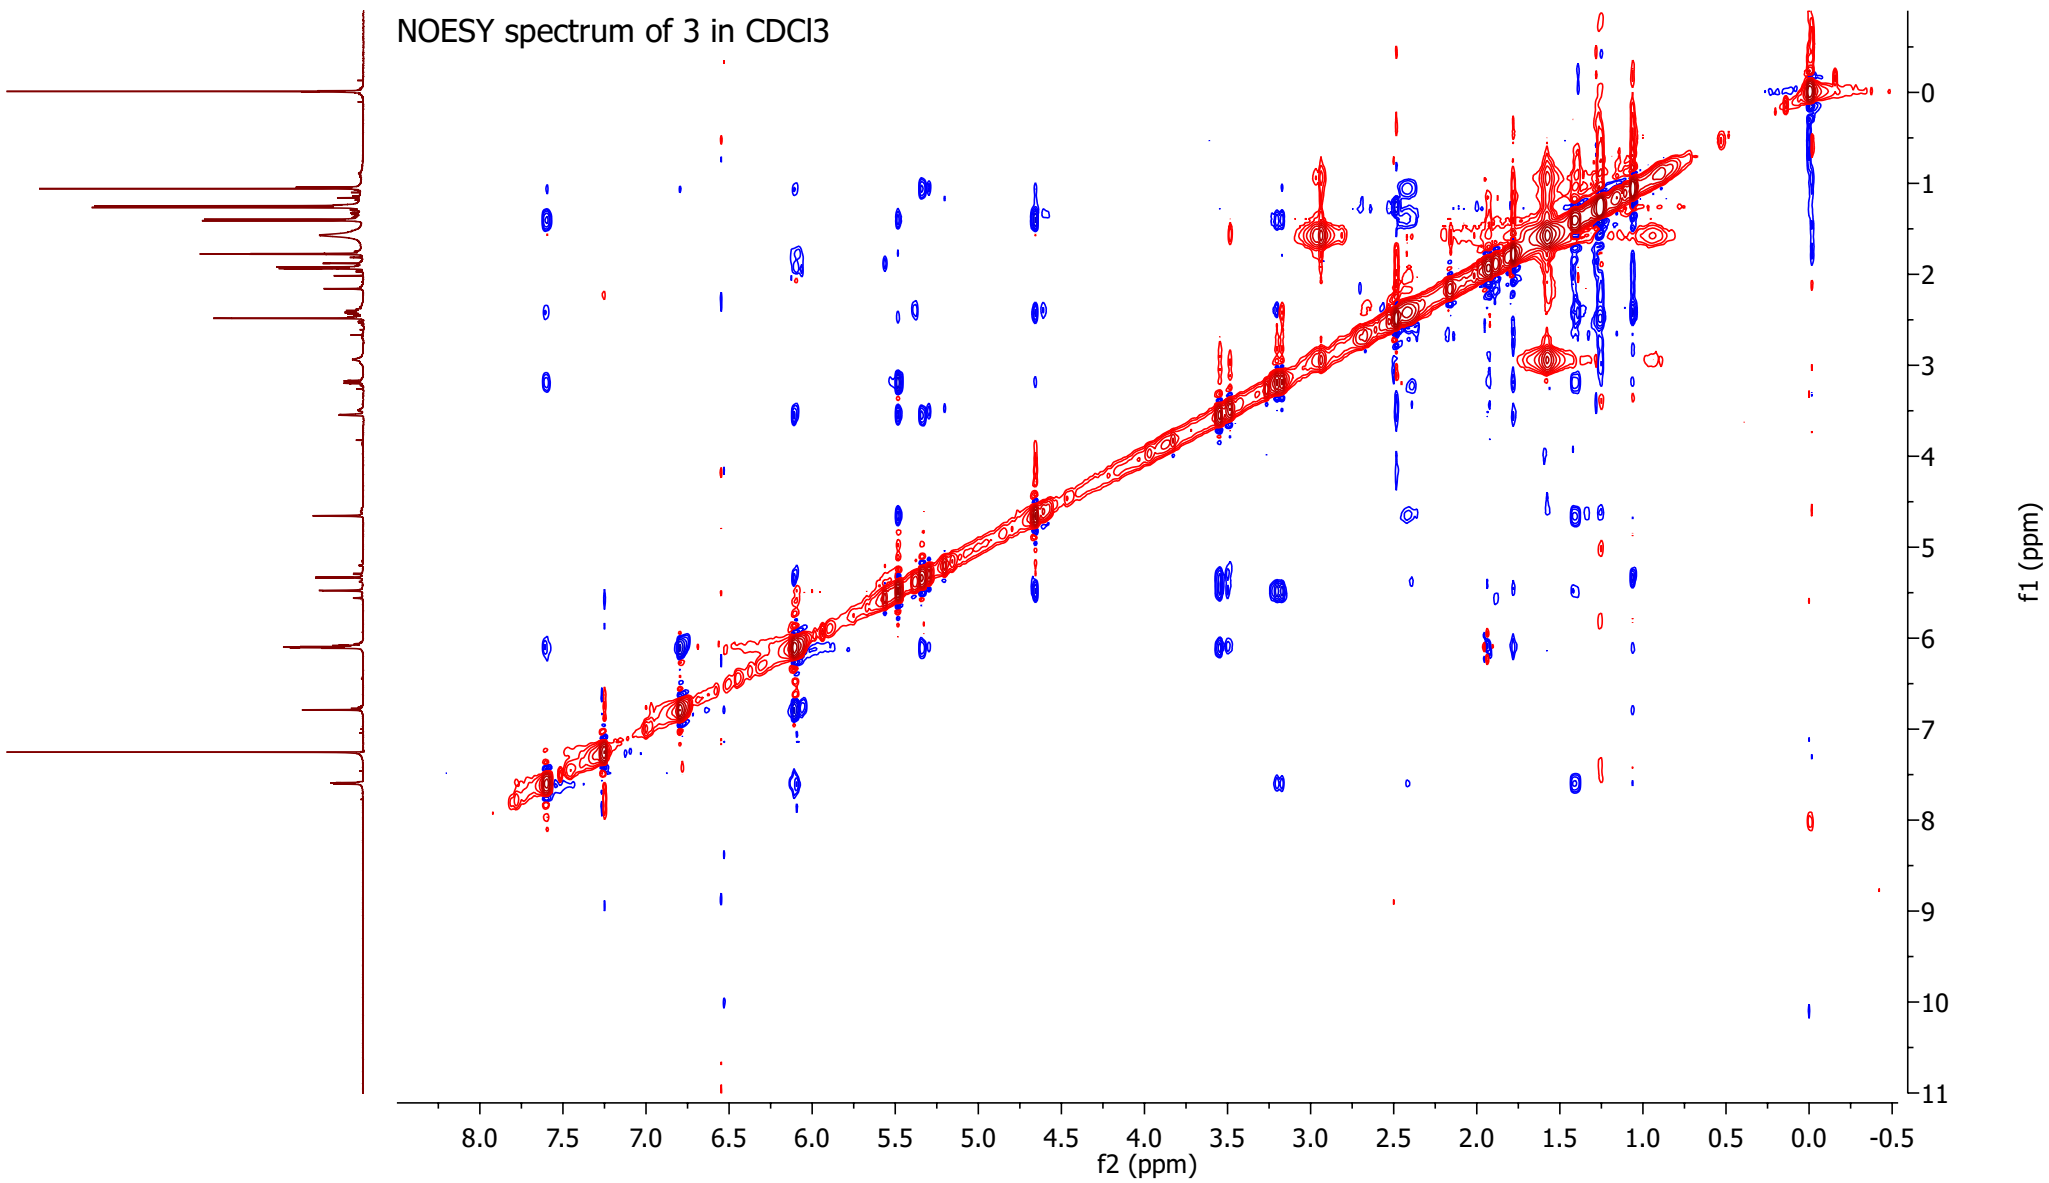



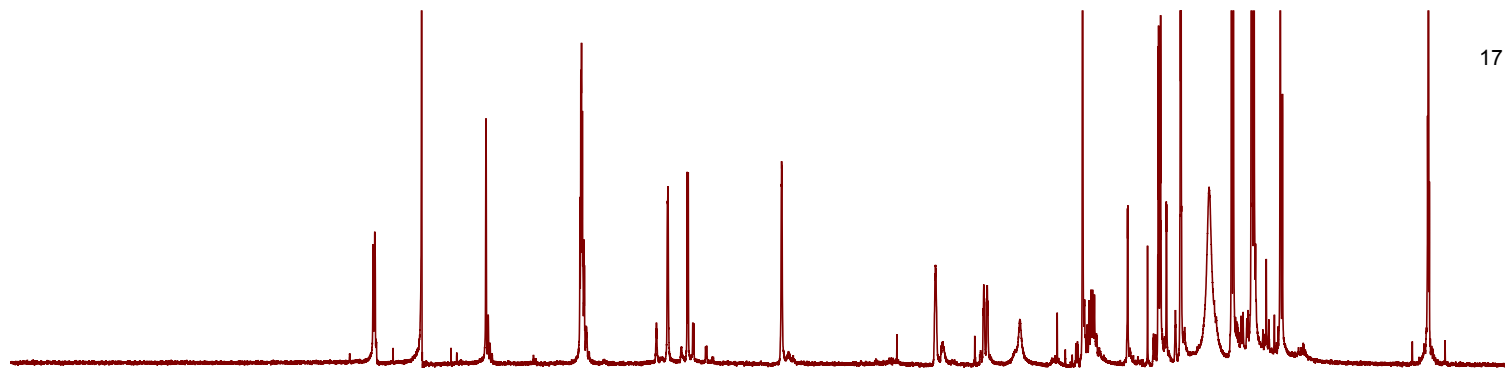COSY spectrum of 3 in CDCl<sub>3</sub>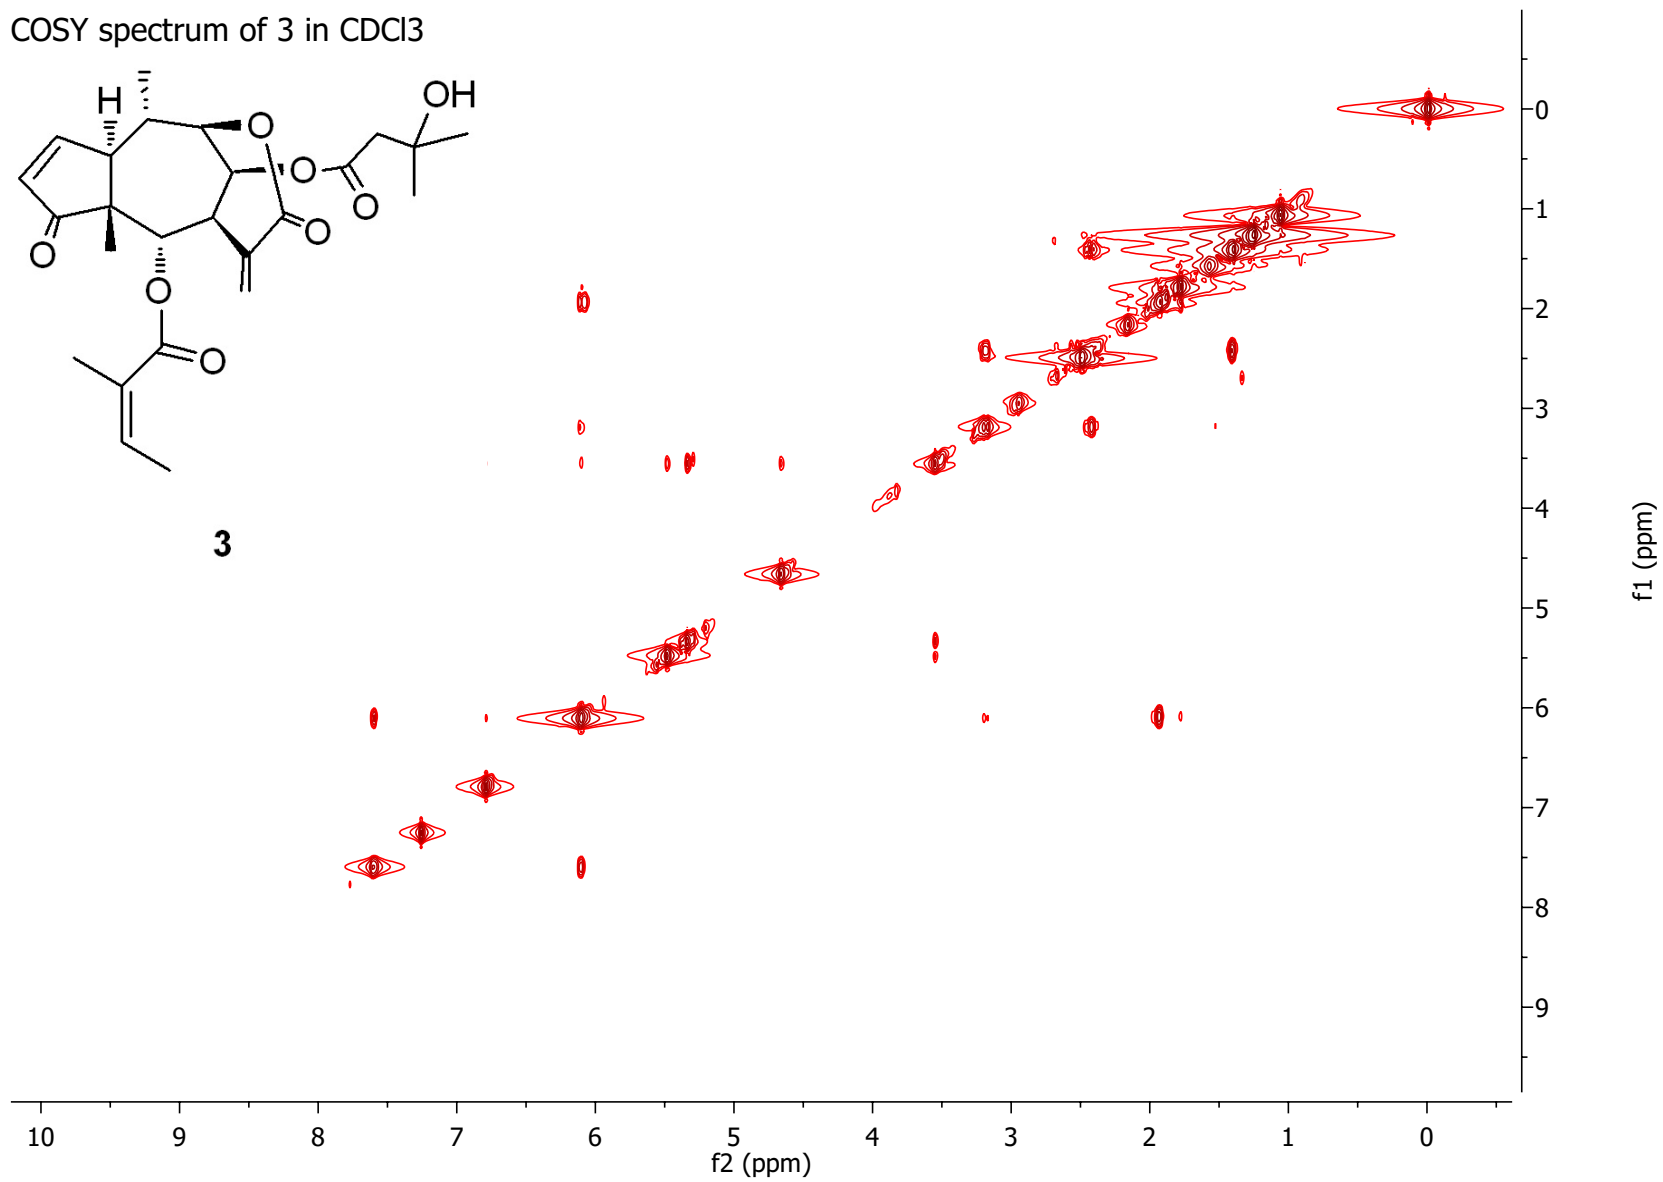

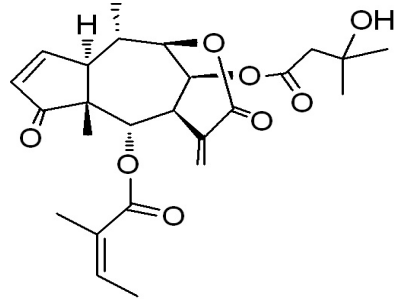

3

18

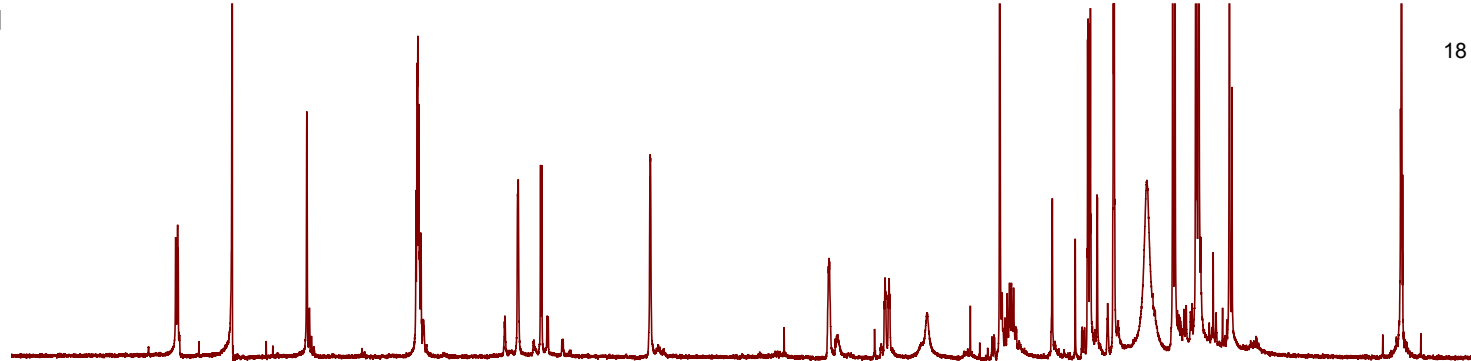

HMBC spectrum of 3 in CDCl<sub>3</sub>

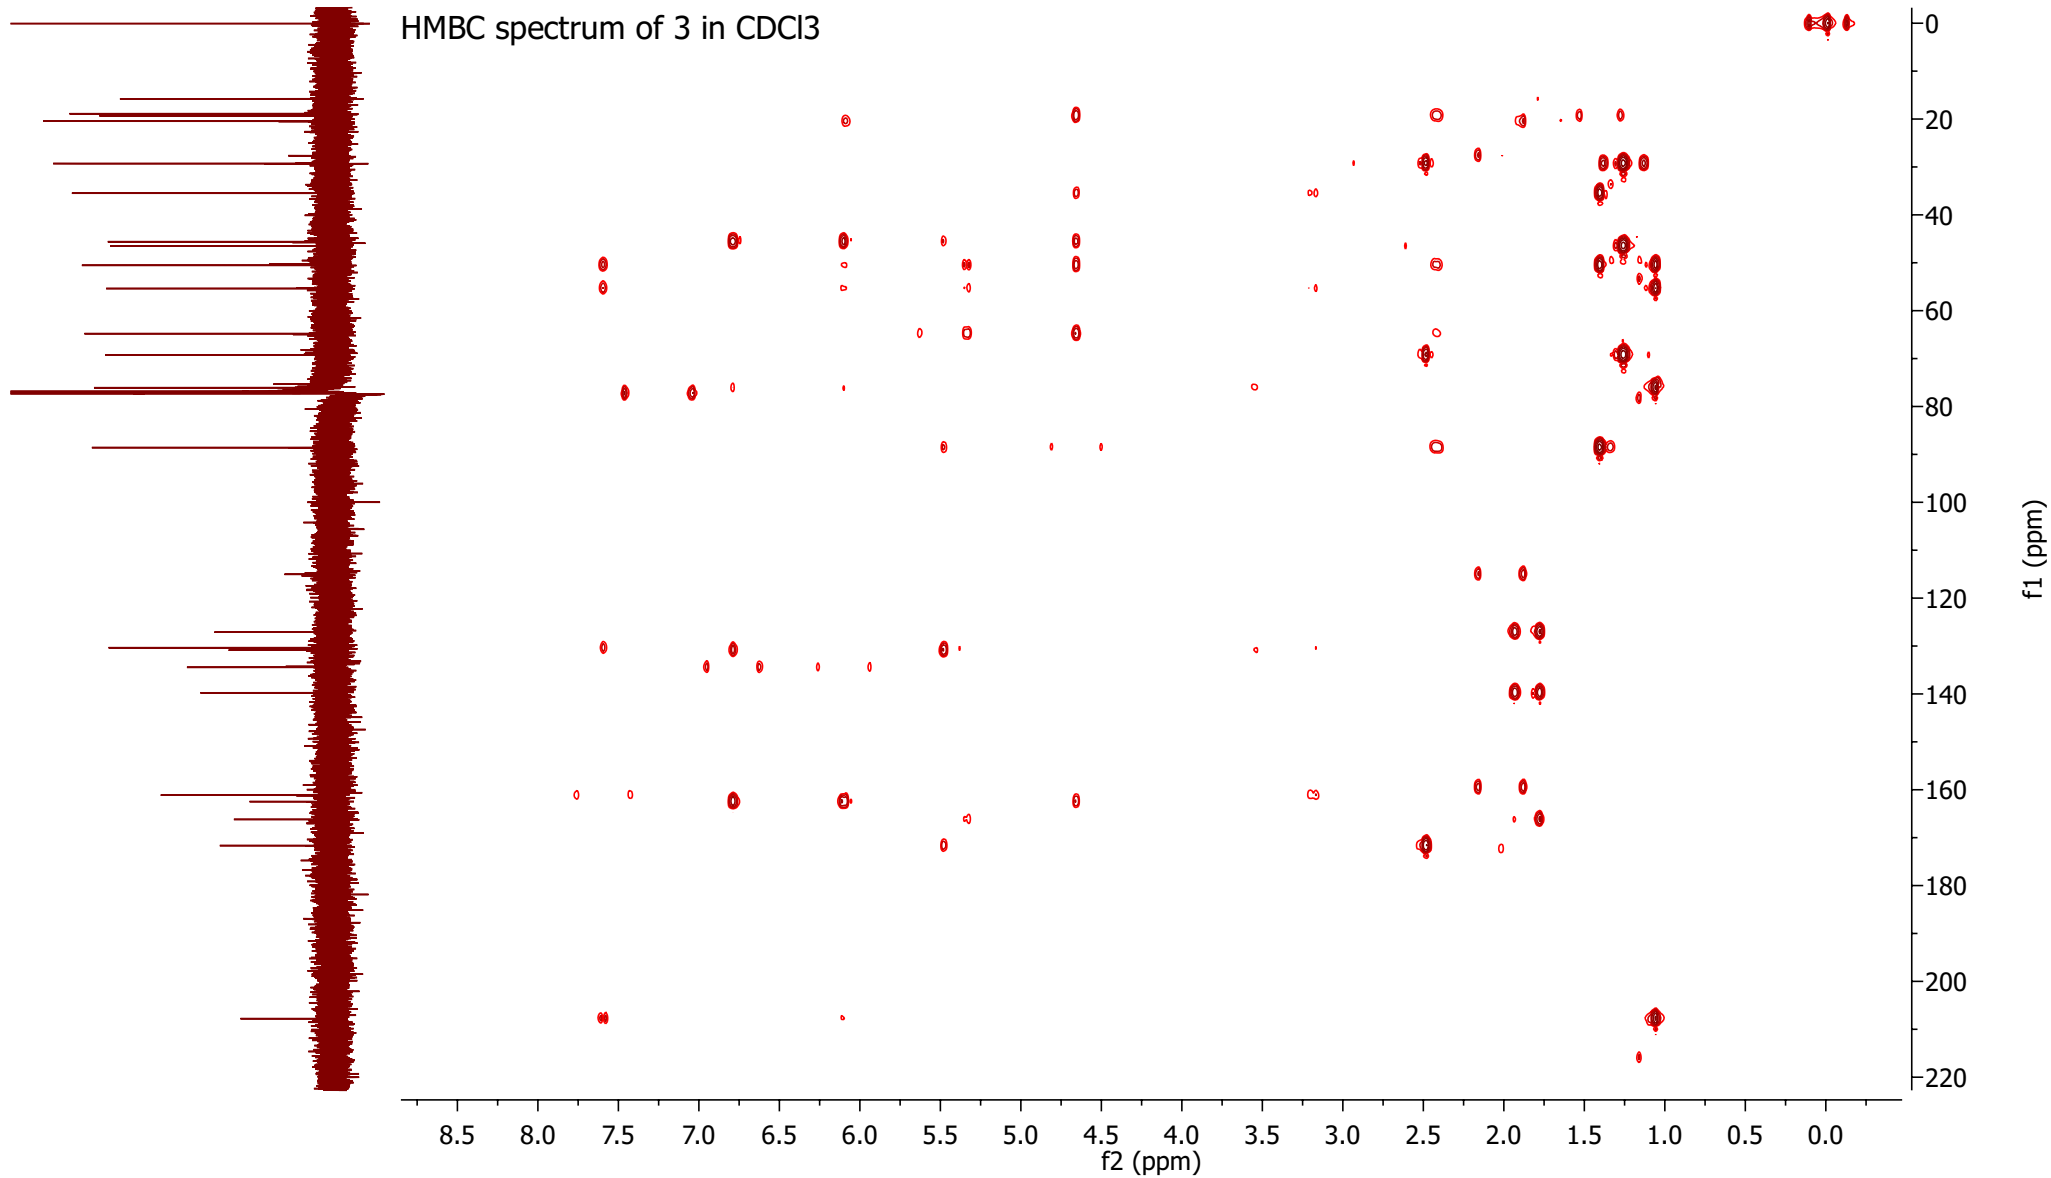

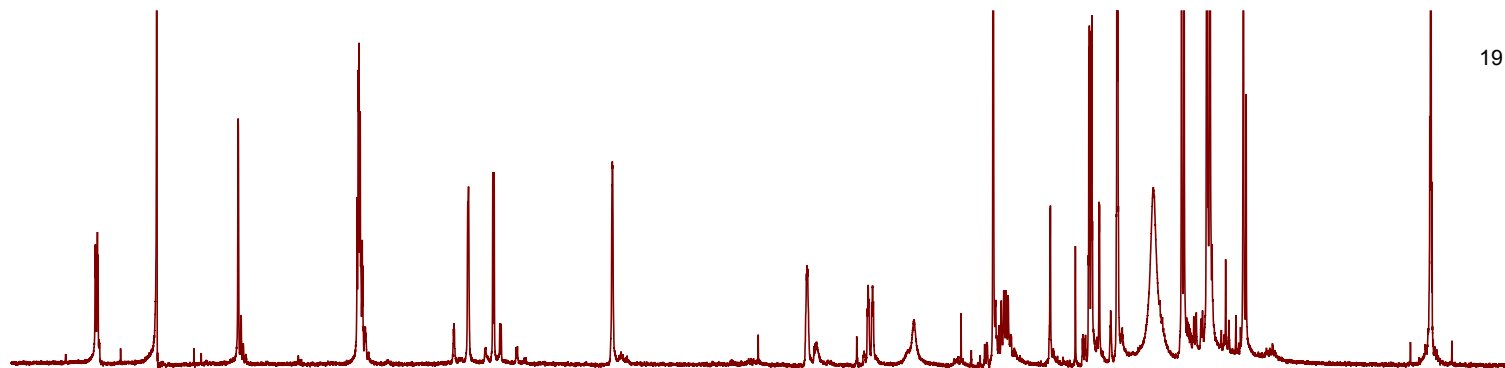HMQC spectrum of 3 in CDCl<sub>3</sub>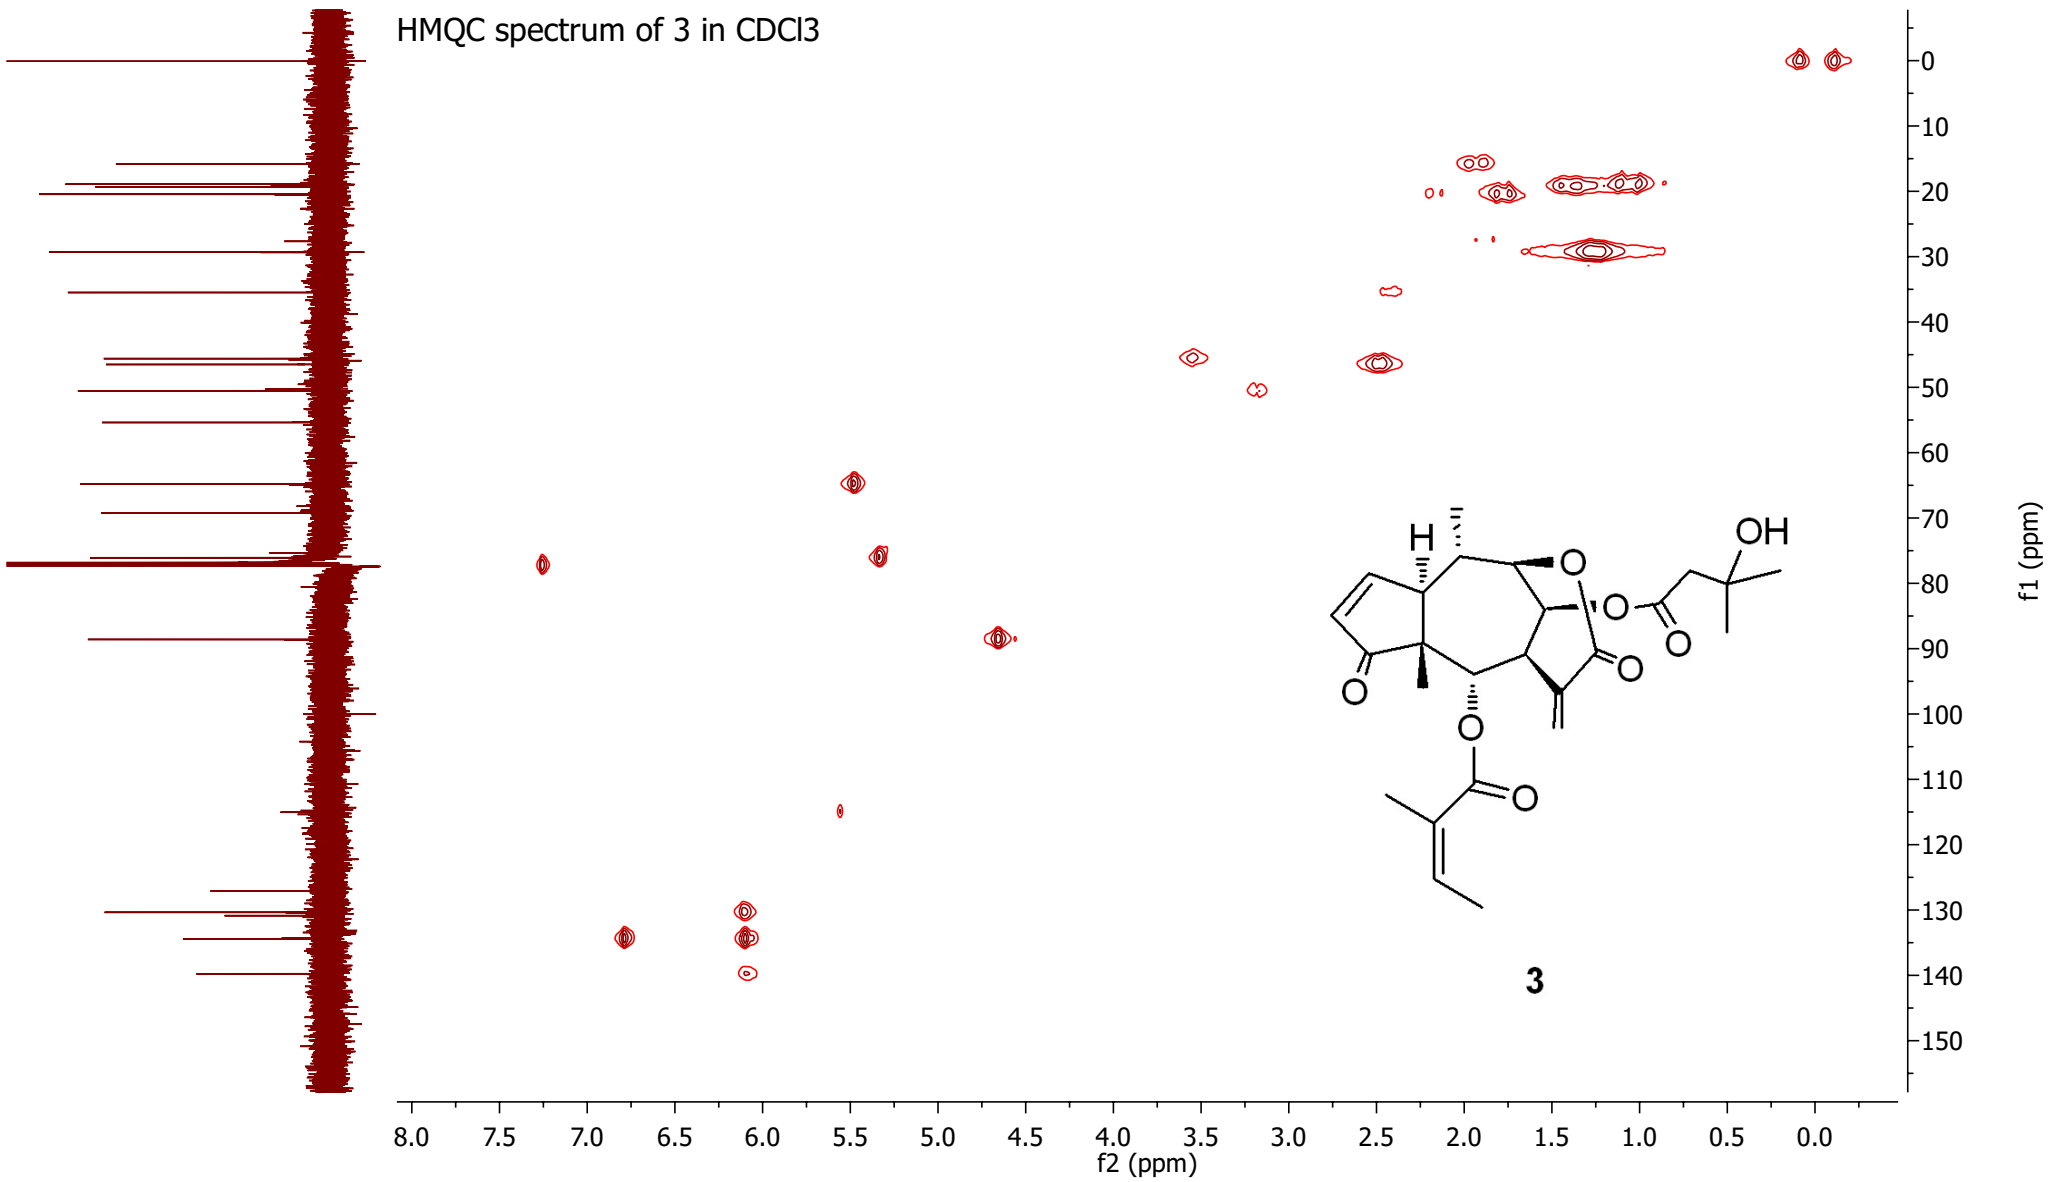

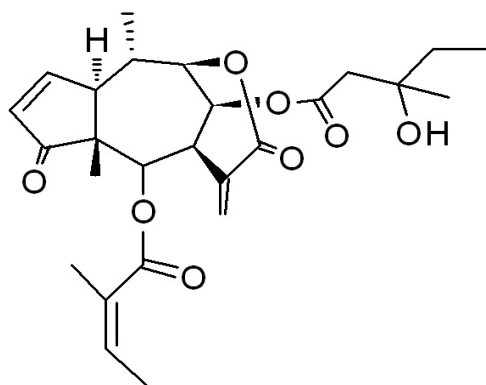

4

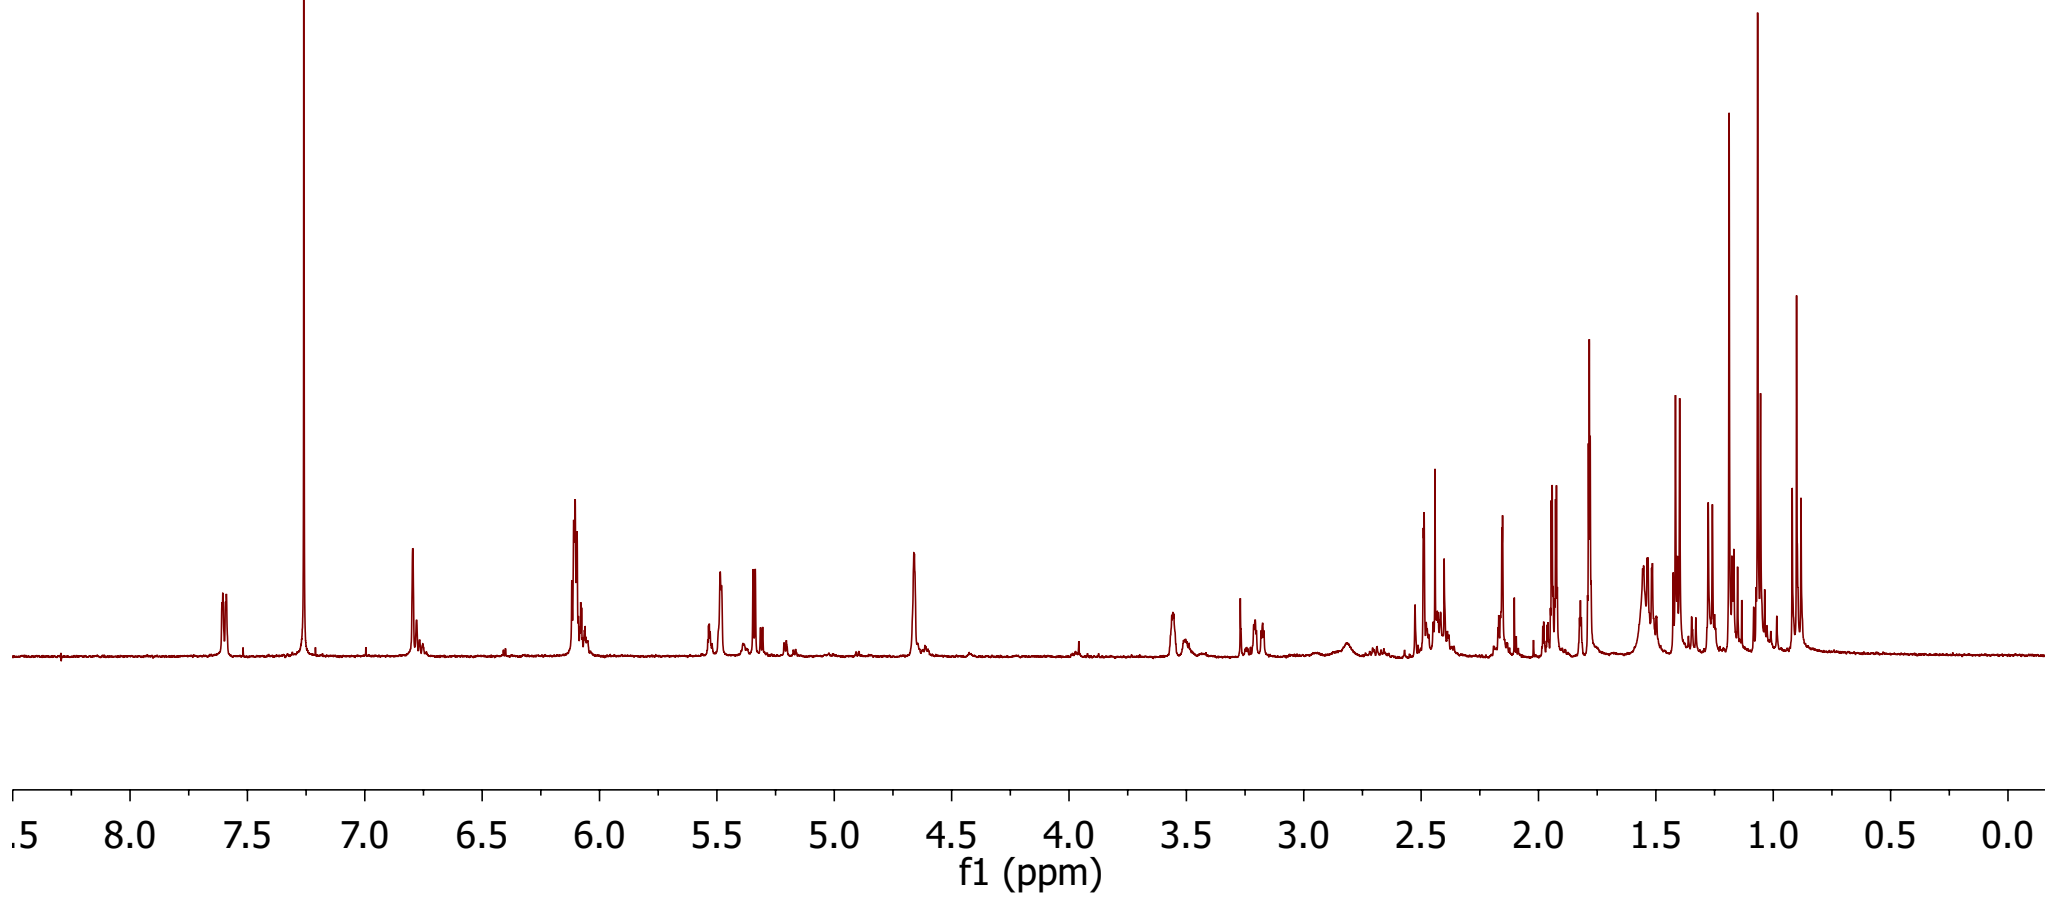

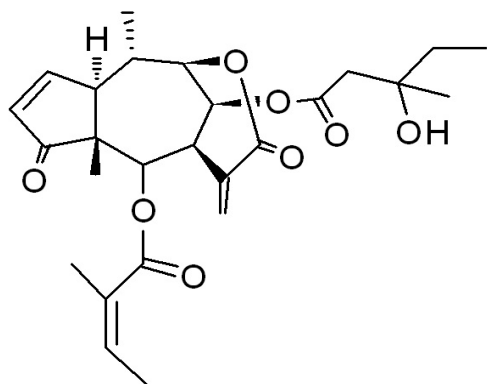

4

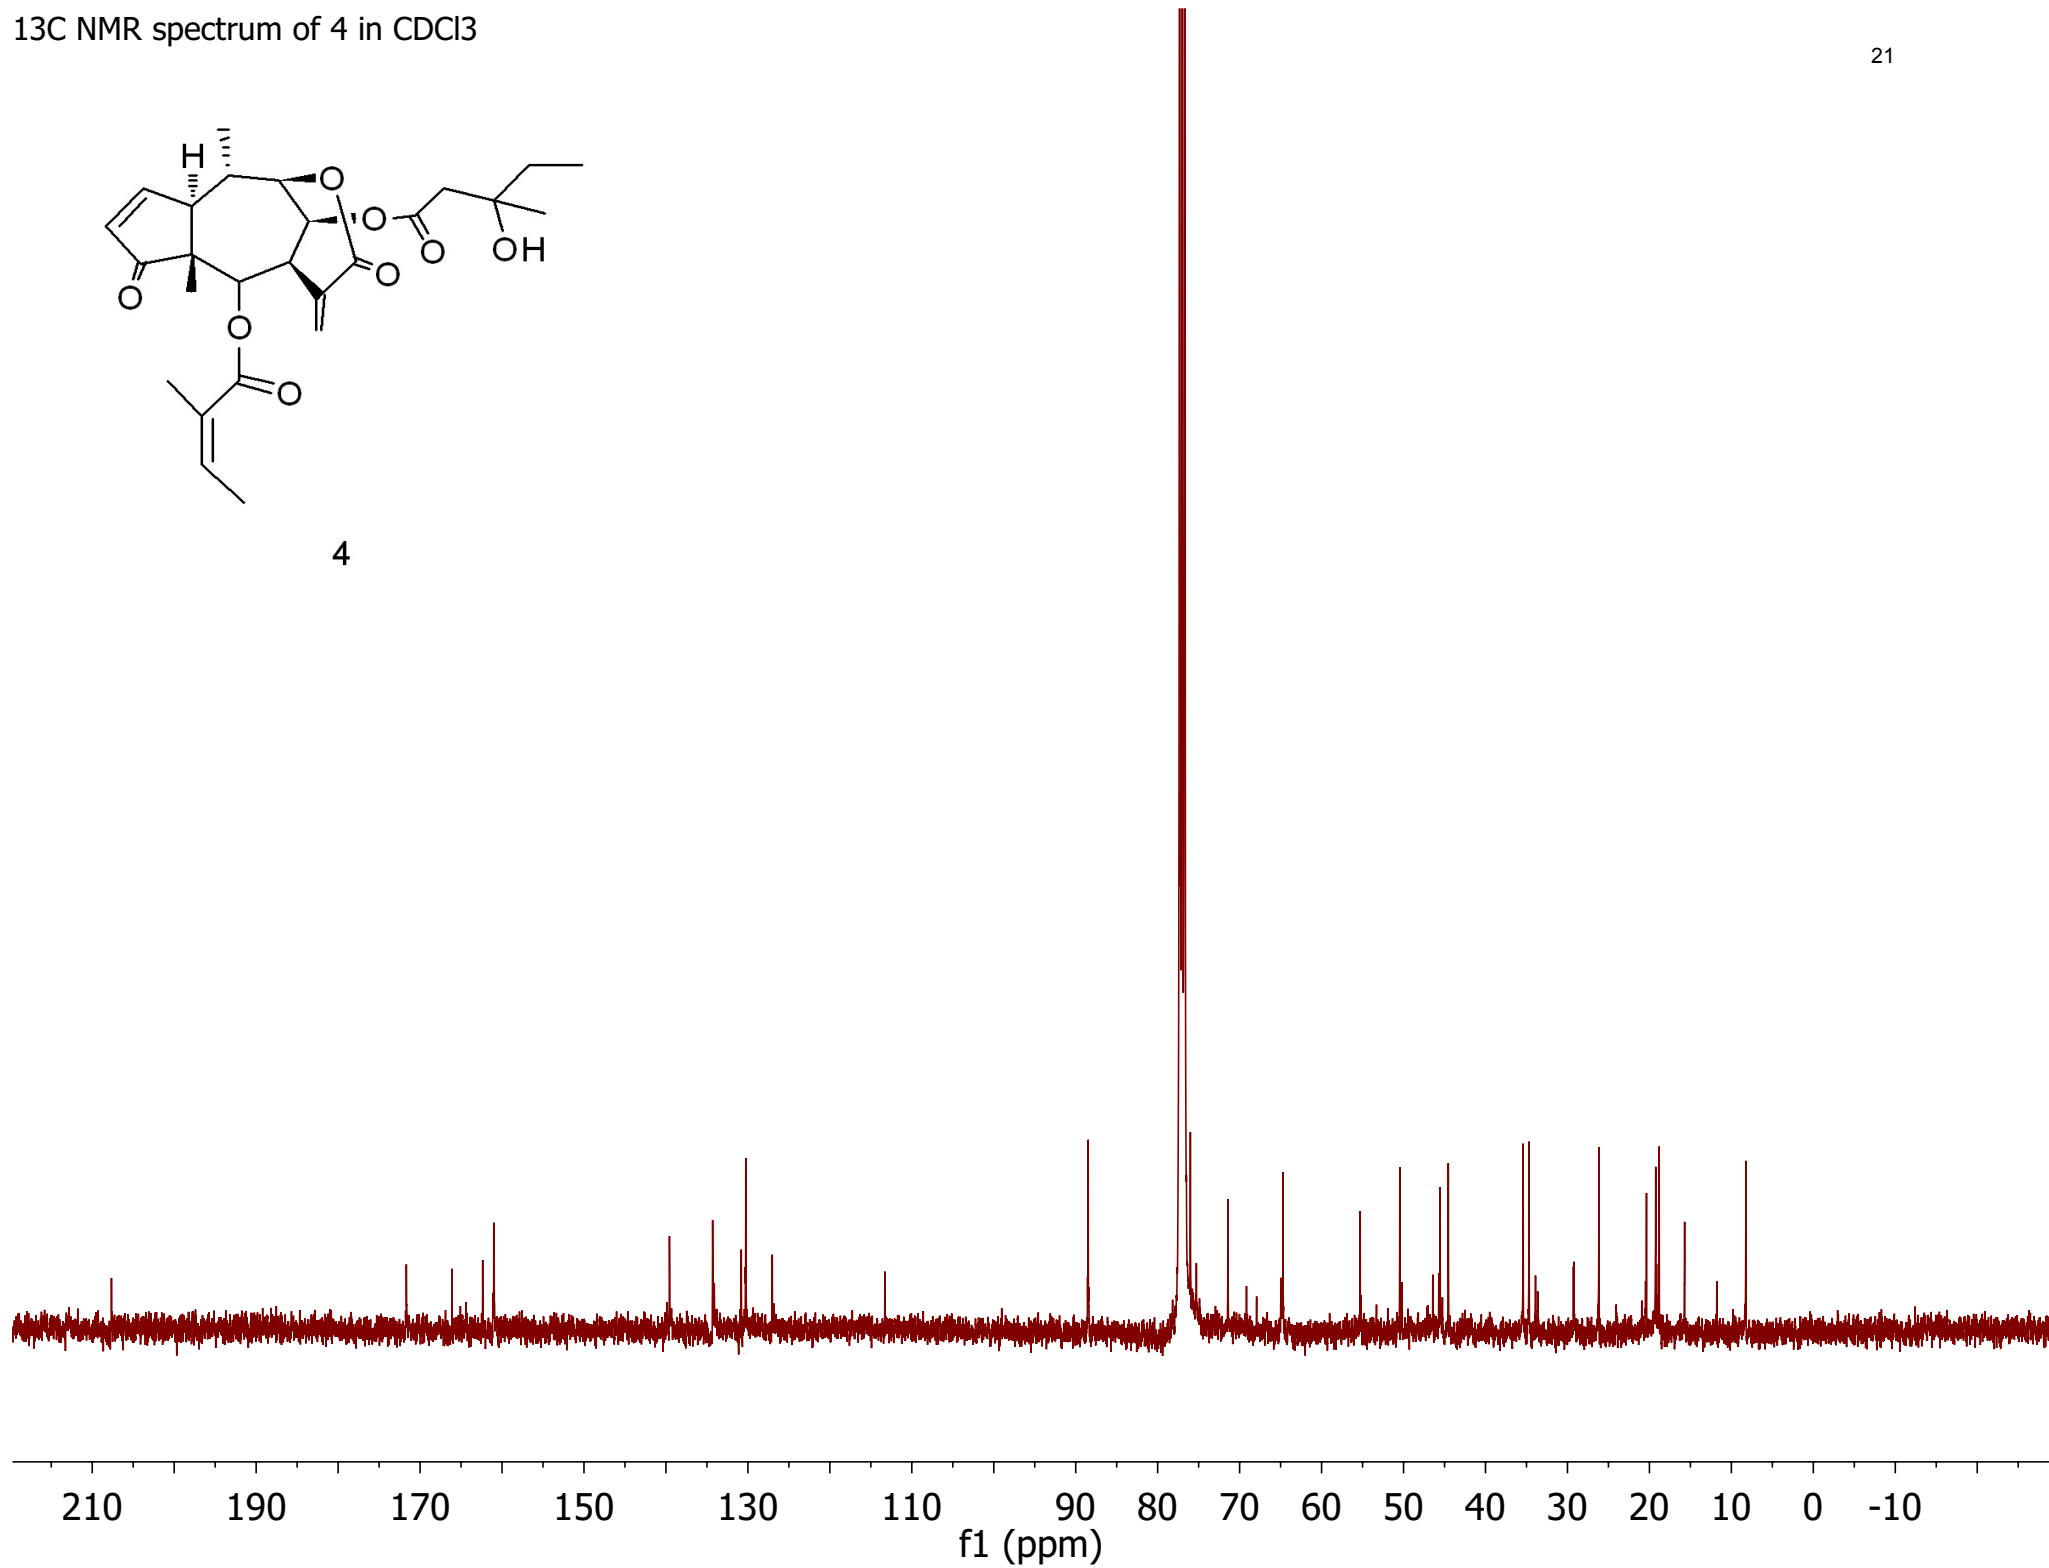

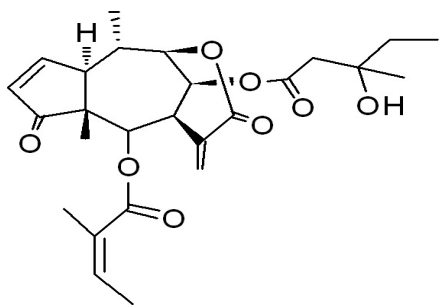

4

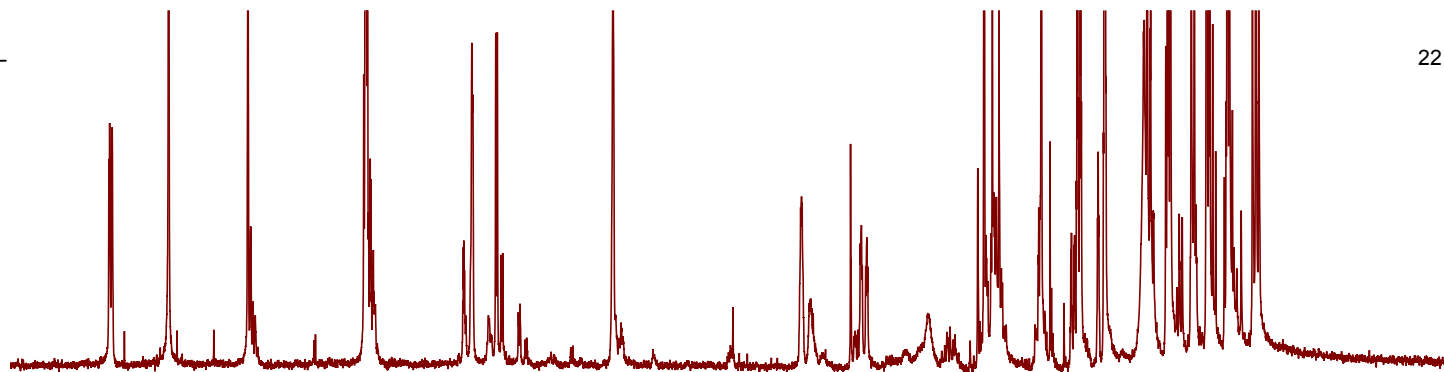COSY spectrum of 4 in  $\text{CDCl}_3$ 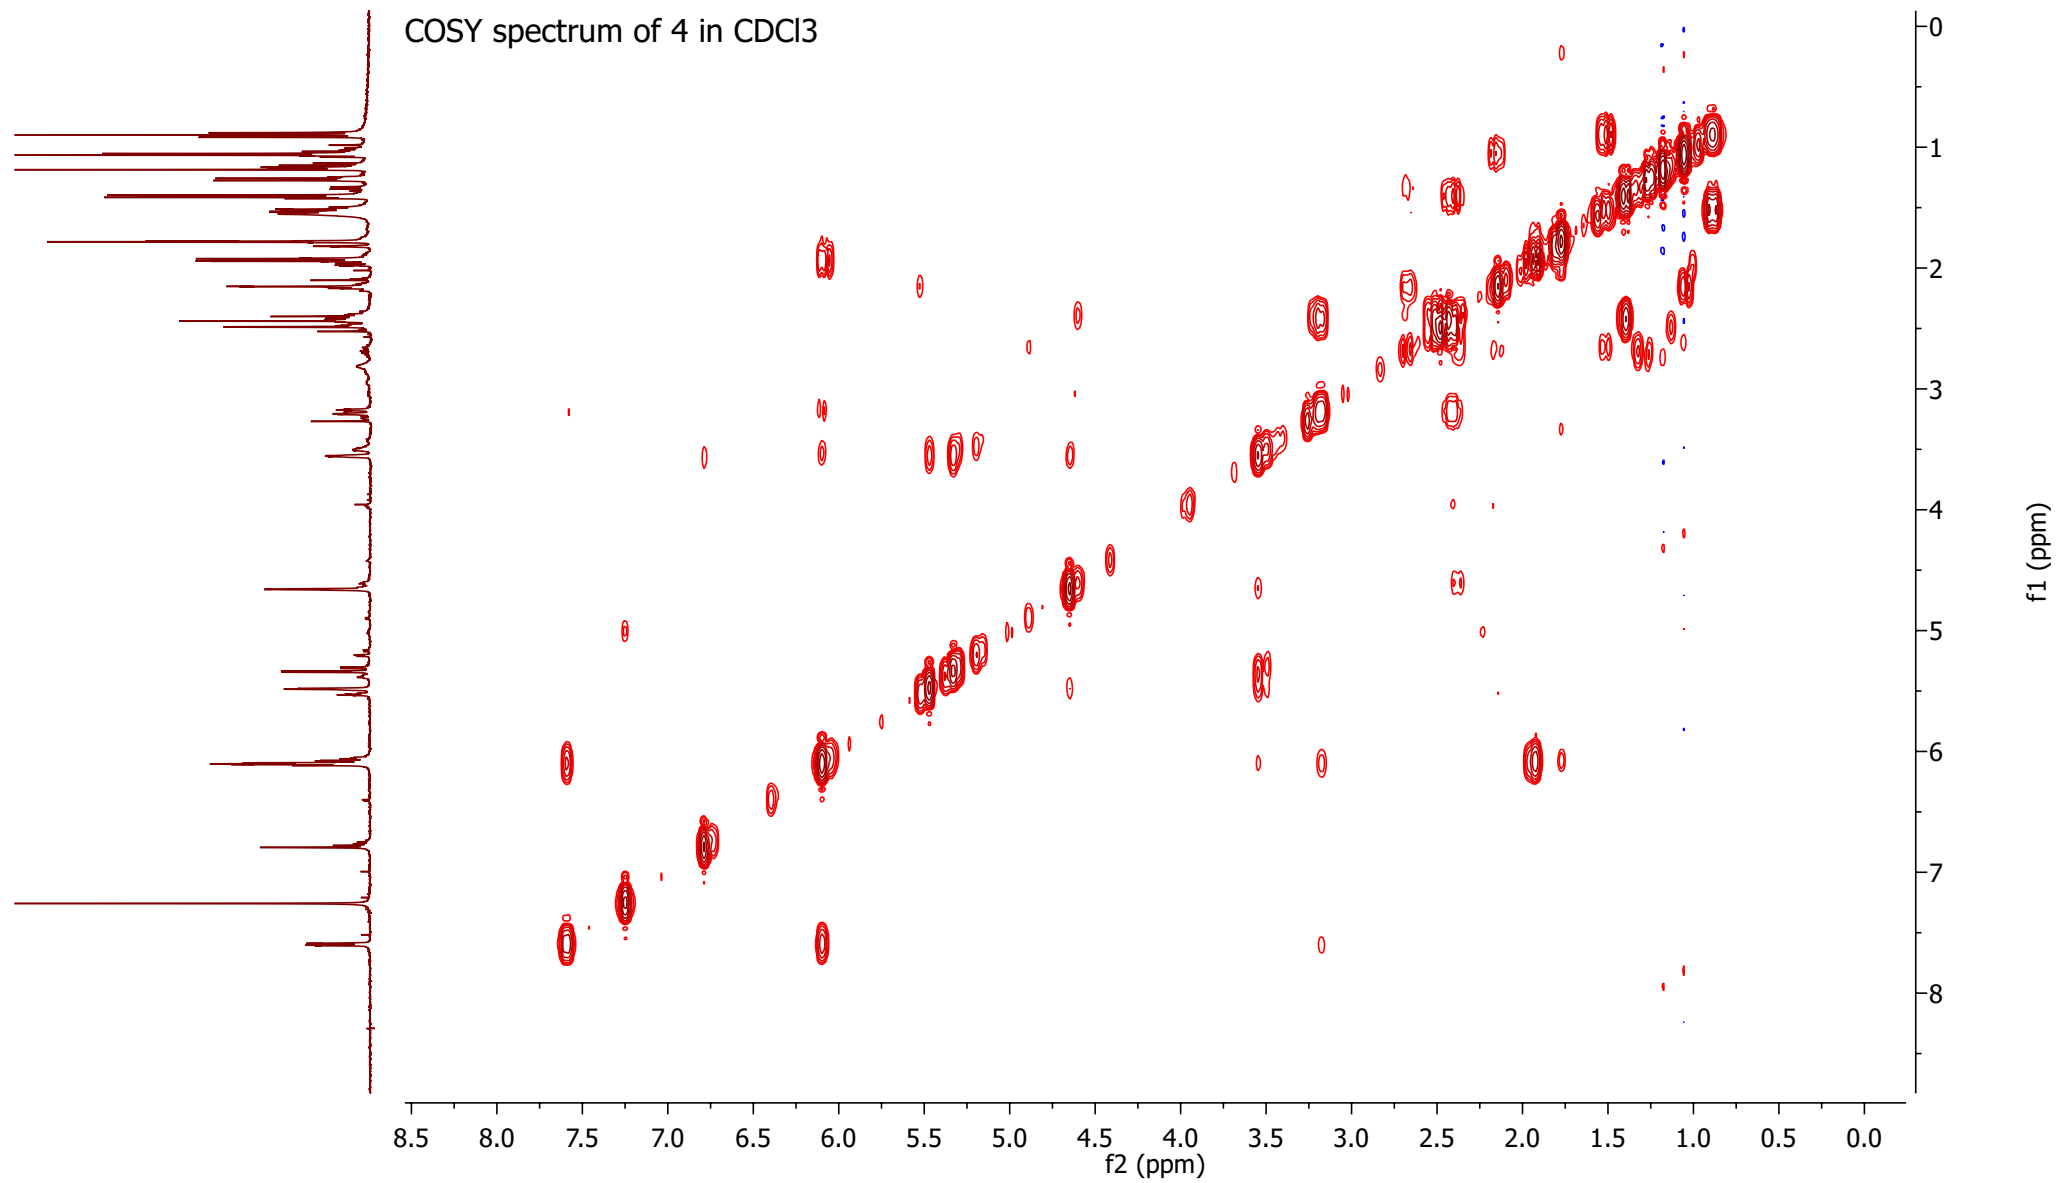

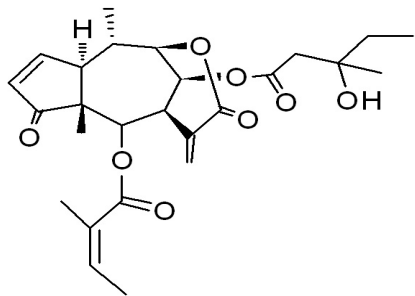

4

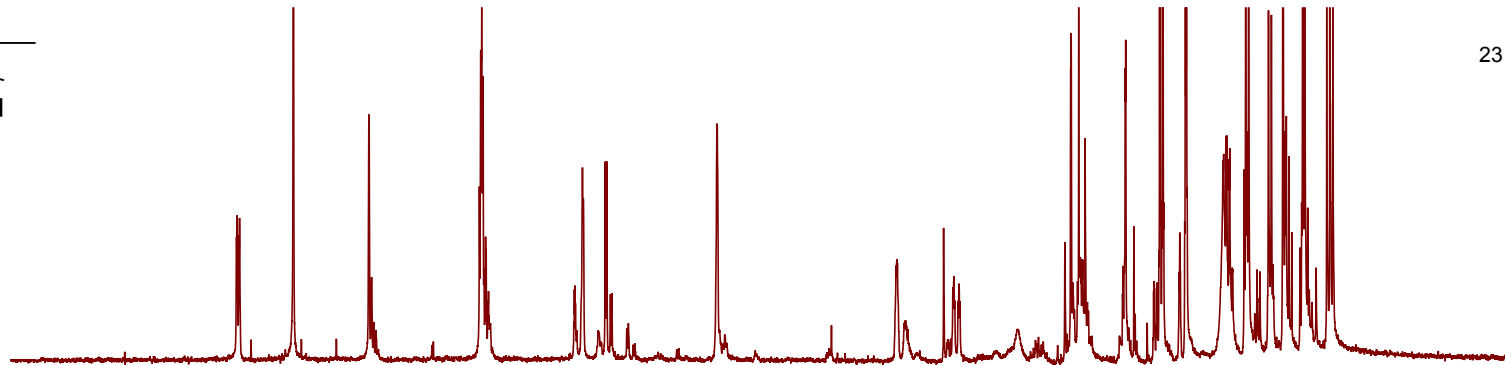HMBC spectrum of 4 in  $\text{CDCl}_3$ 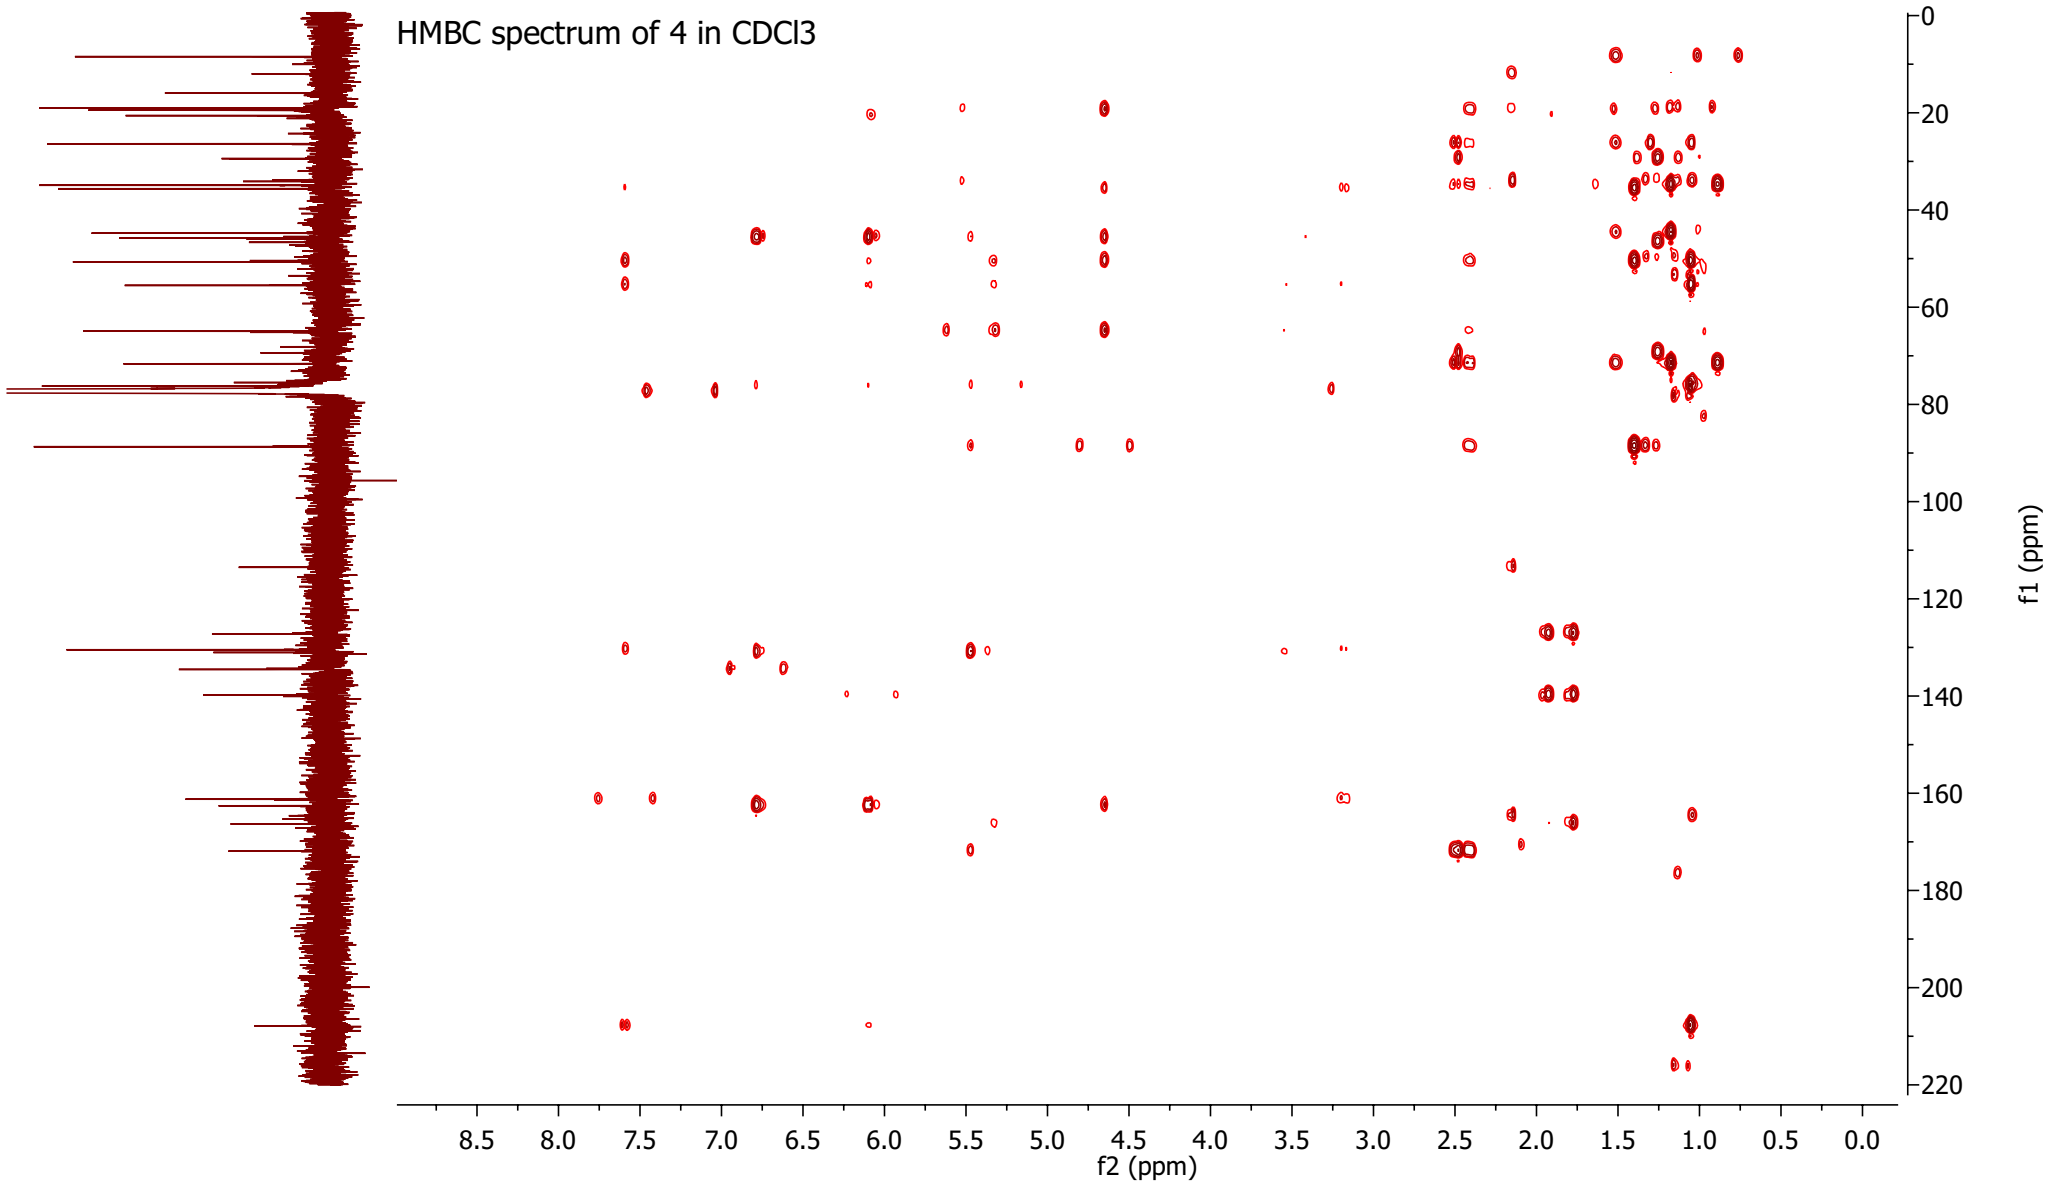

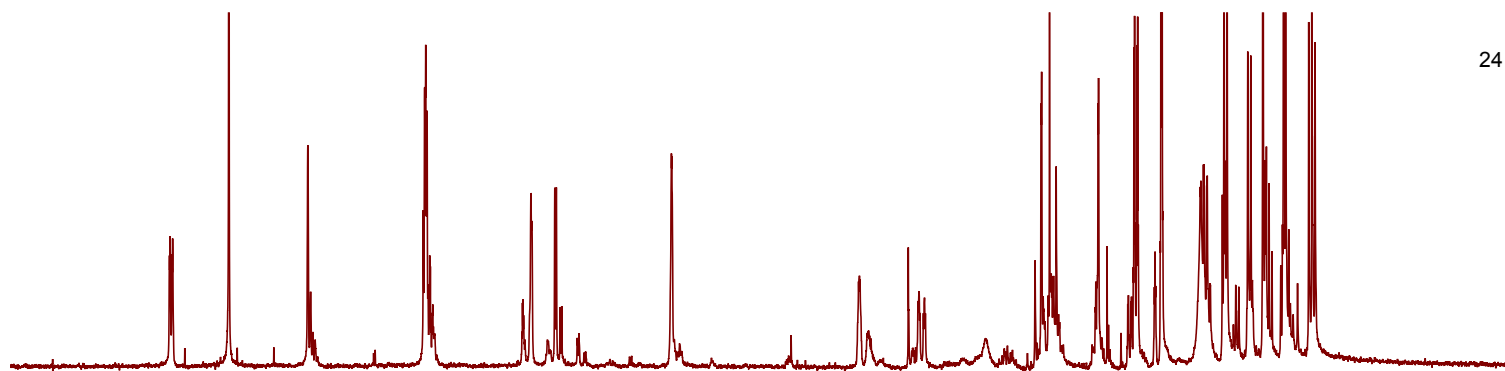HMQC spectrum of 4 in CDCl<sub>3</sub>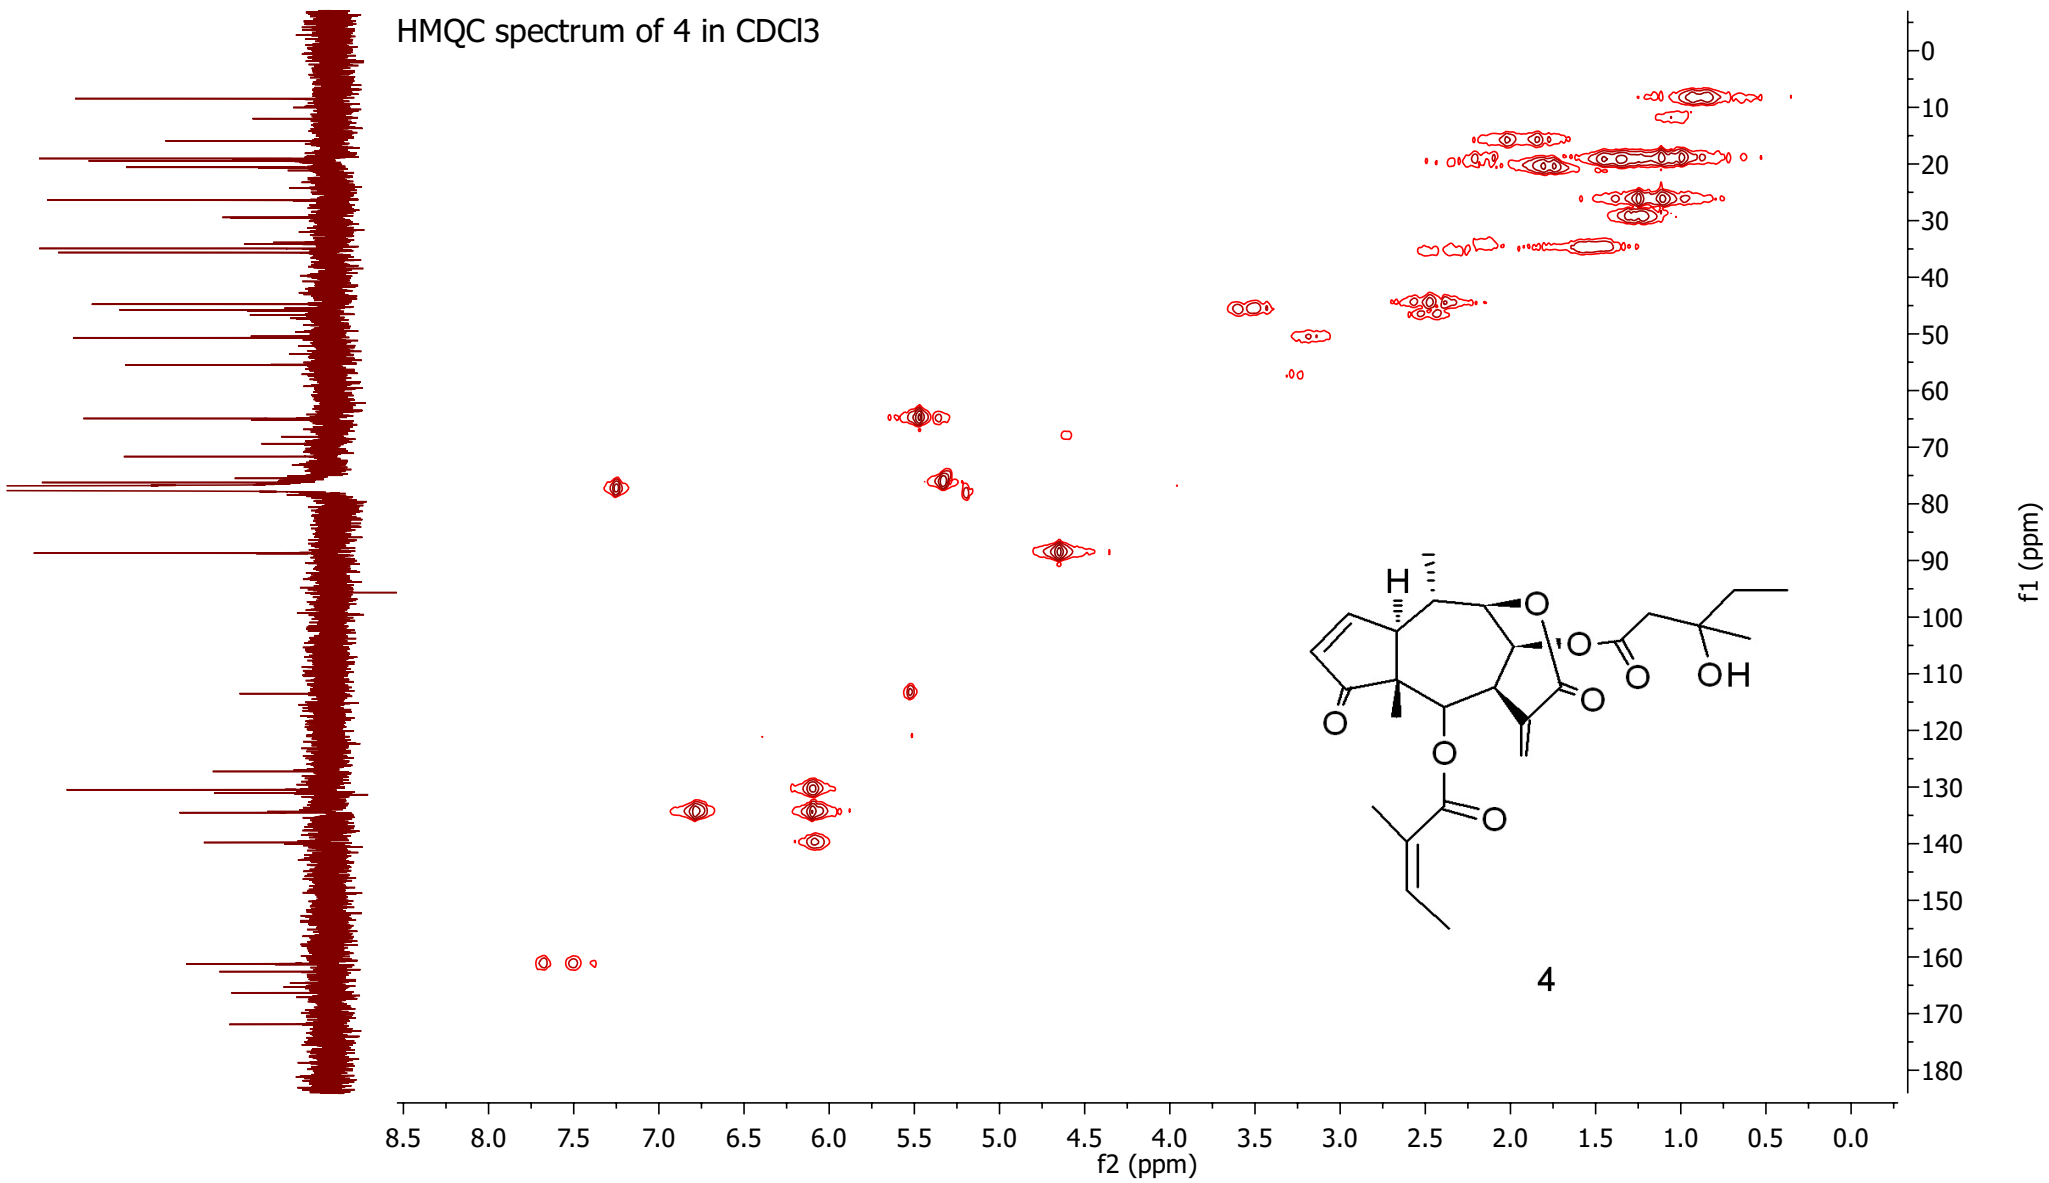



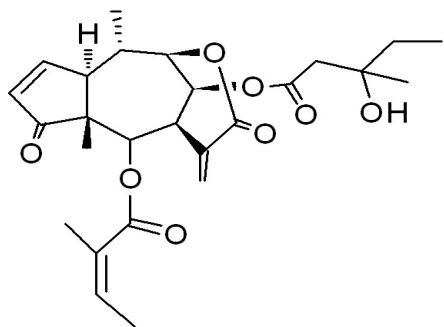

4

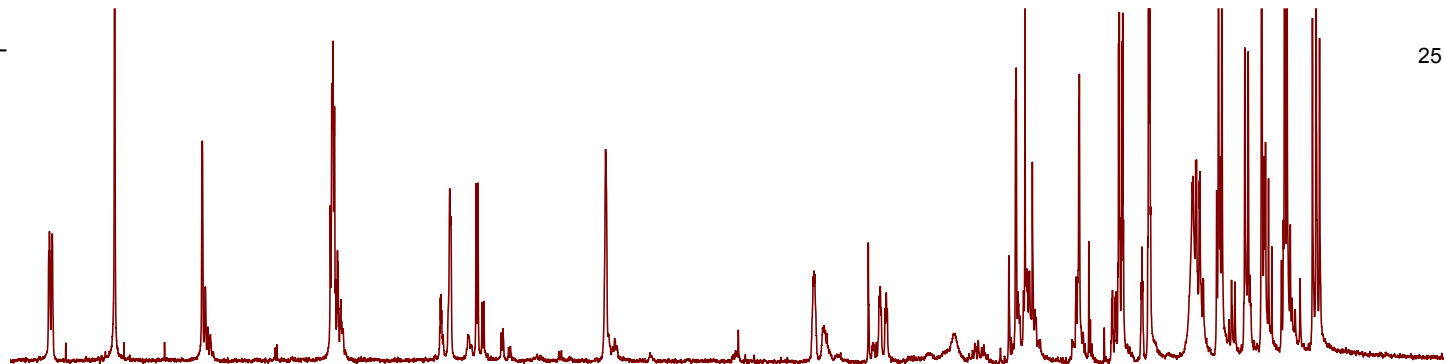NOESY spectrum of 4 in CDCl<sub>3</sub>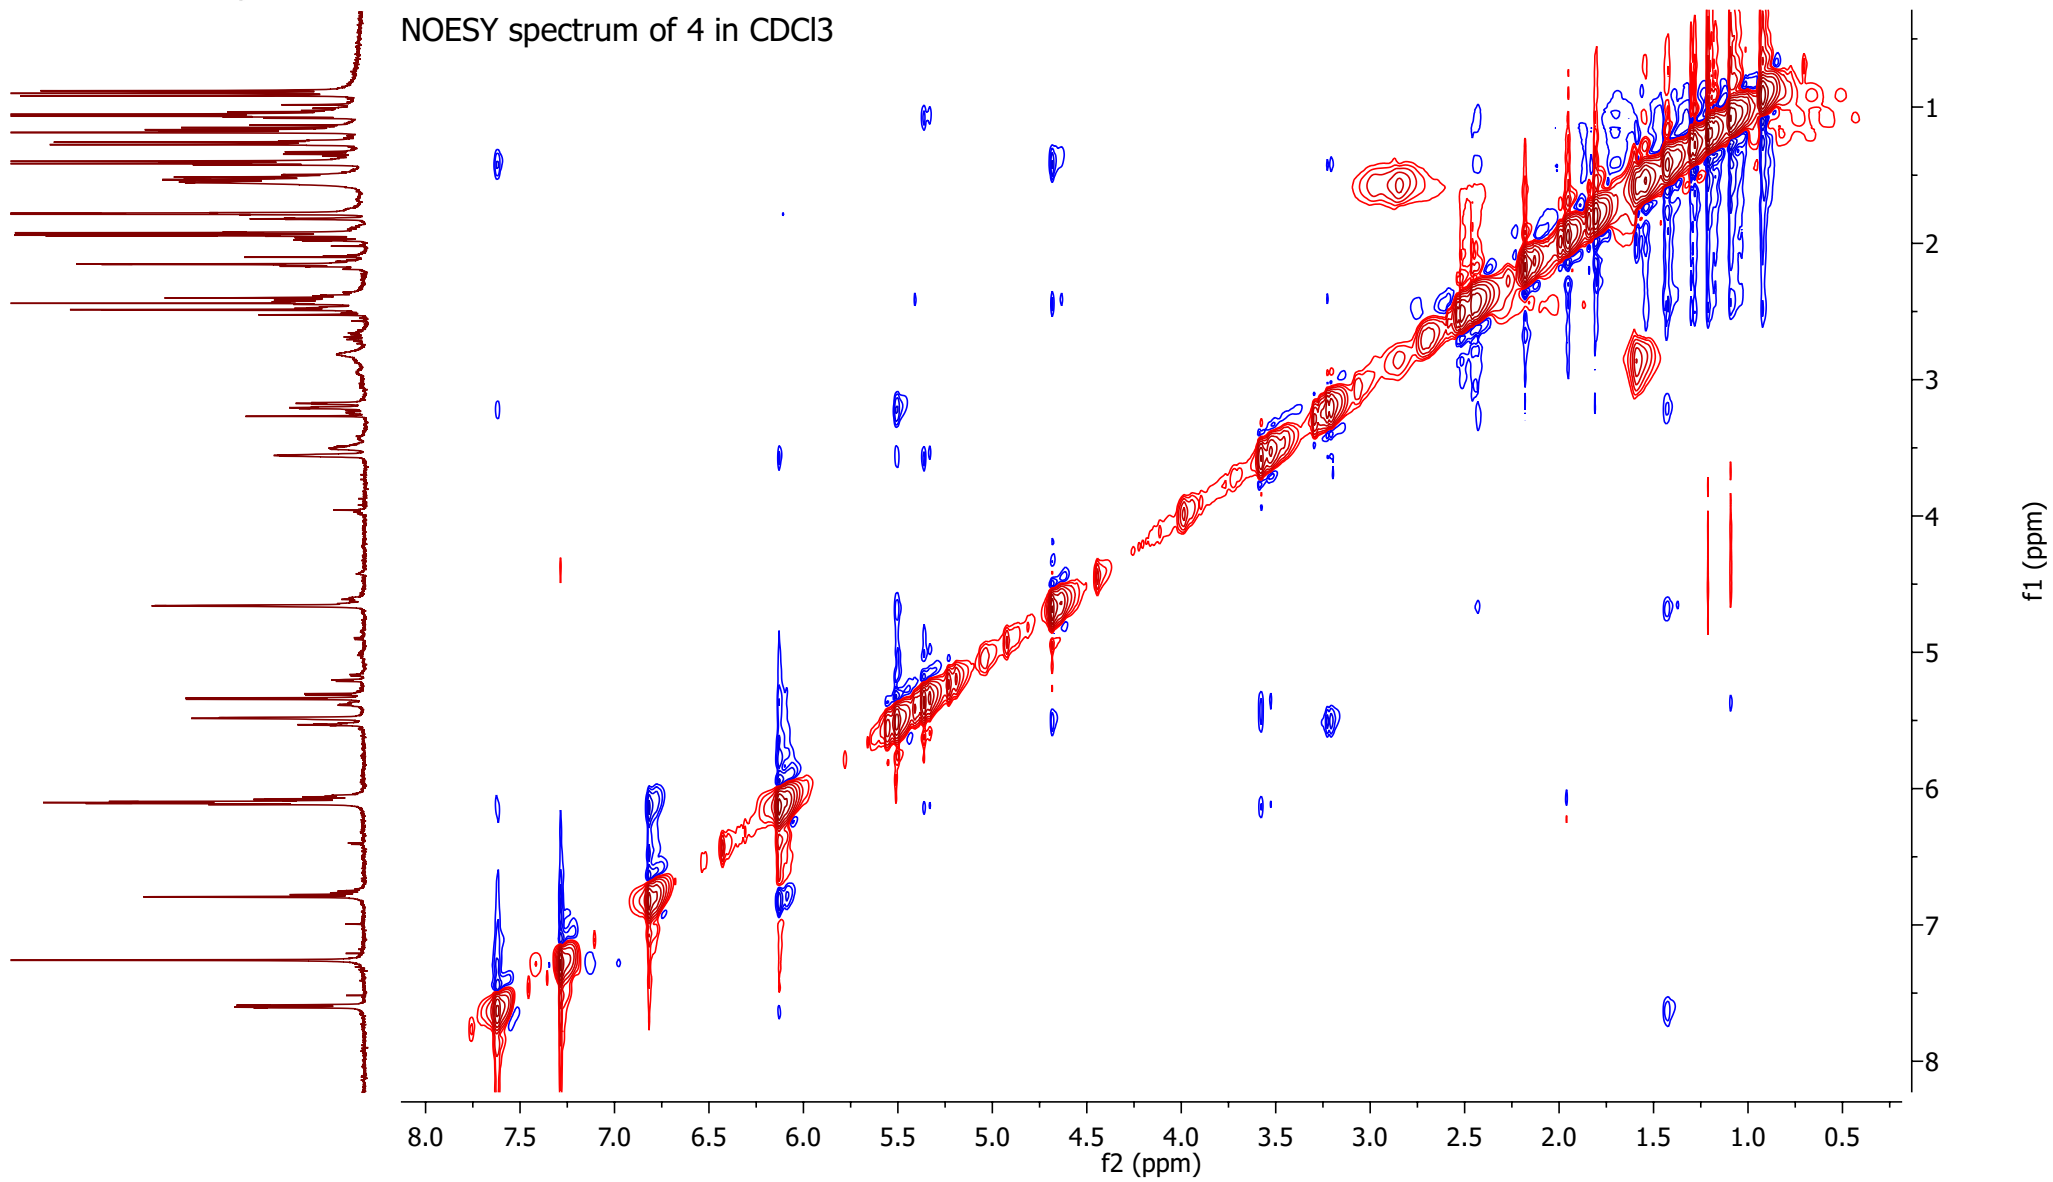

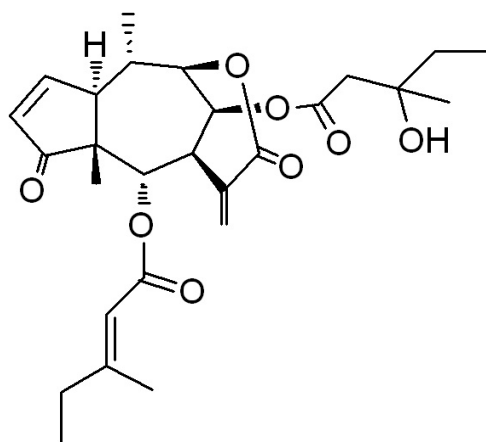

5

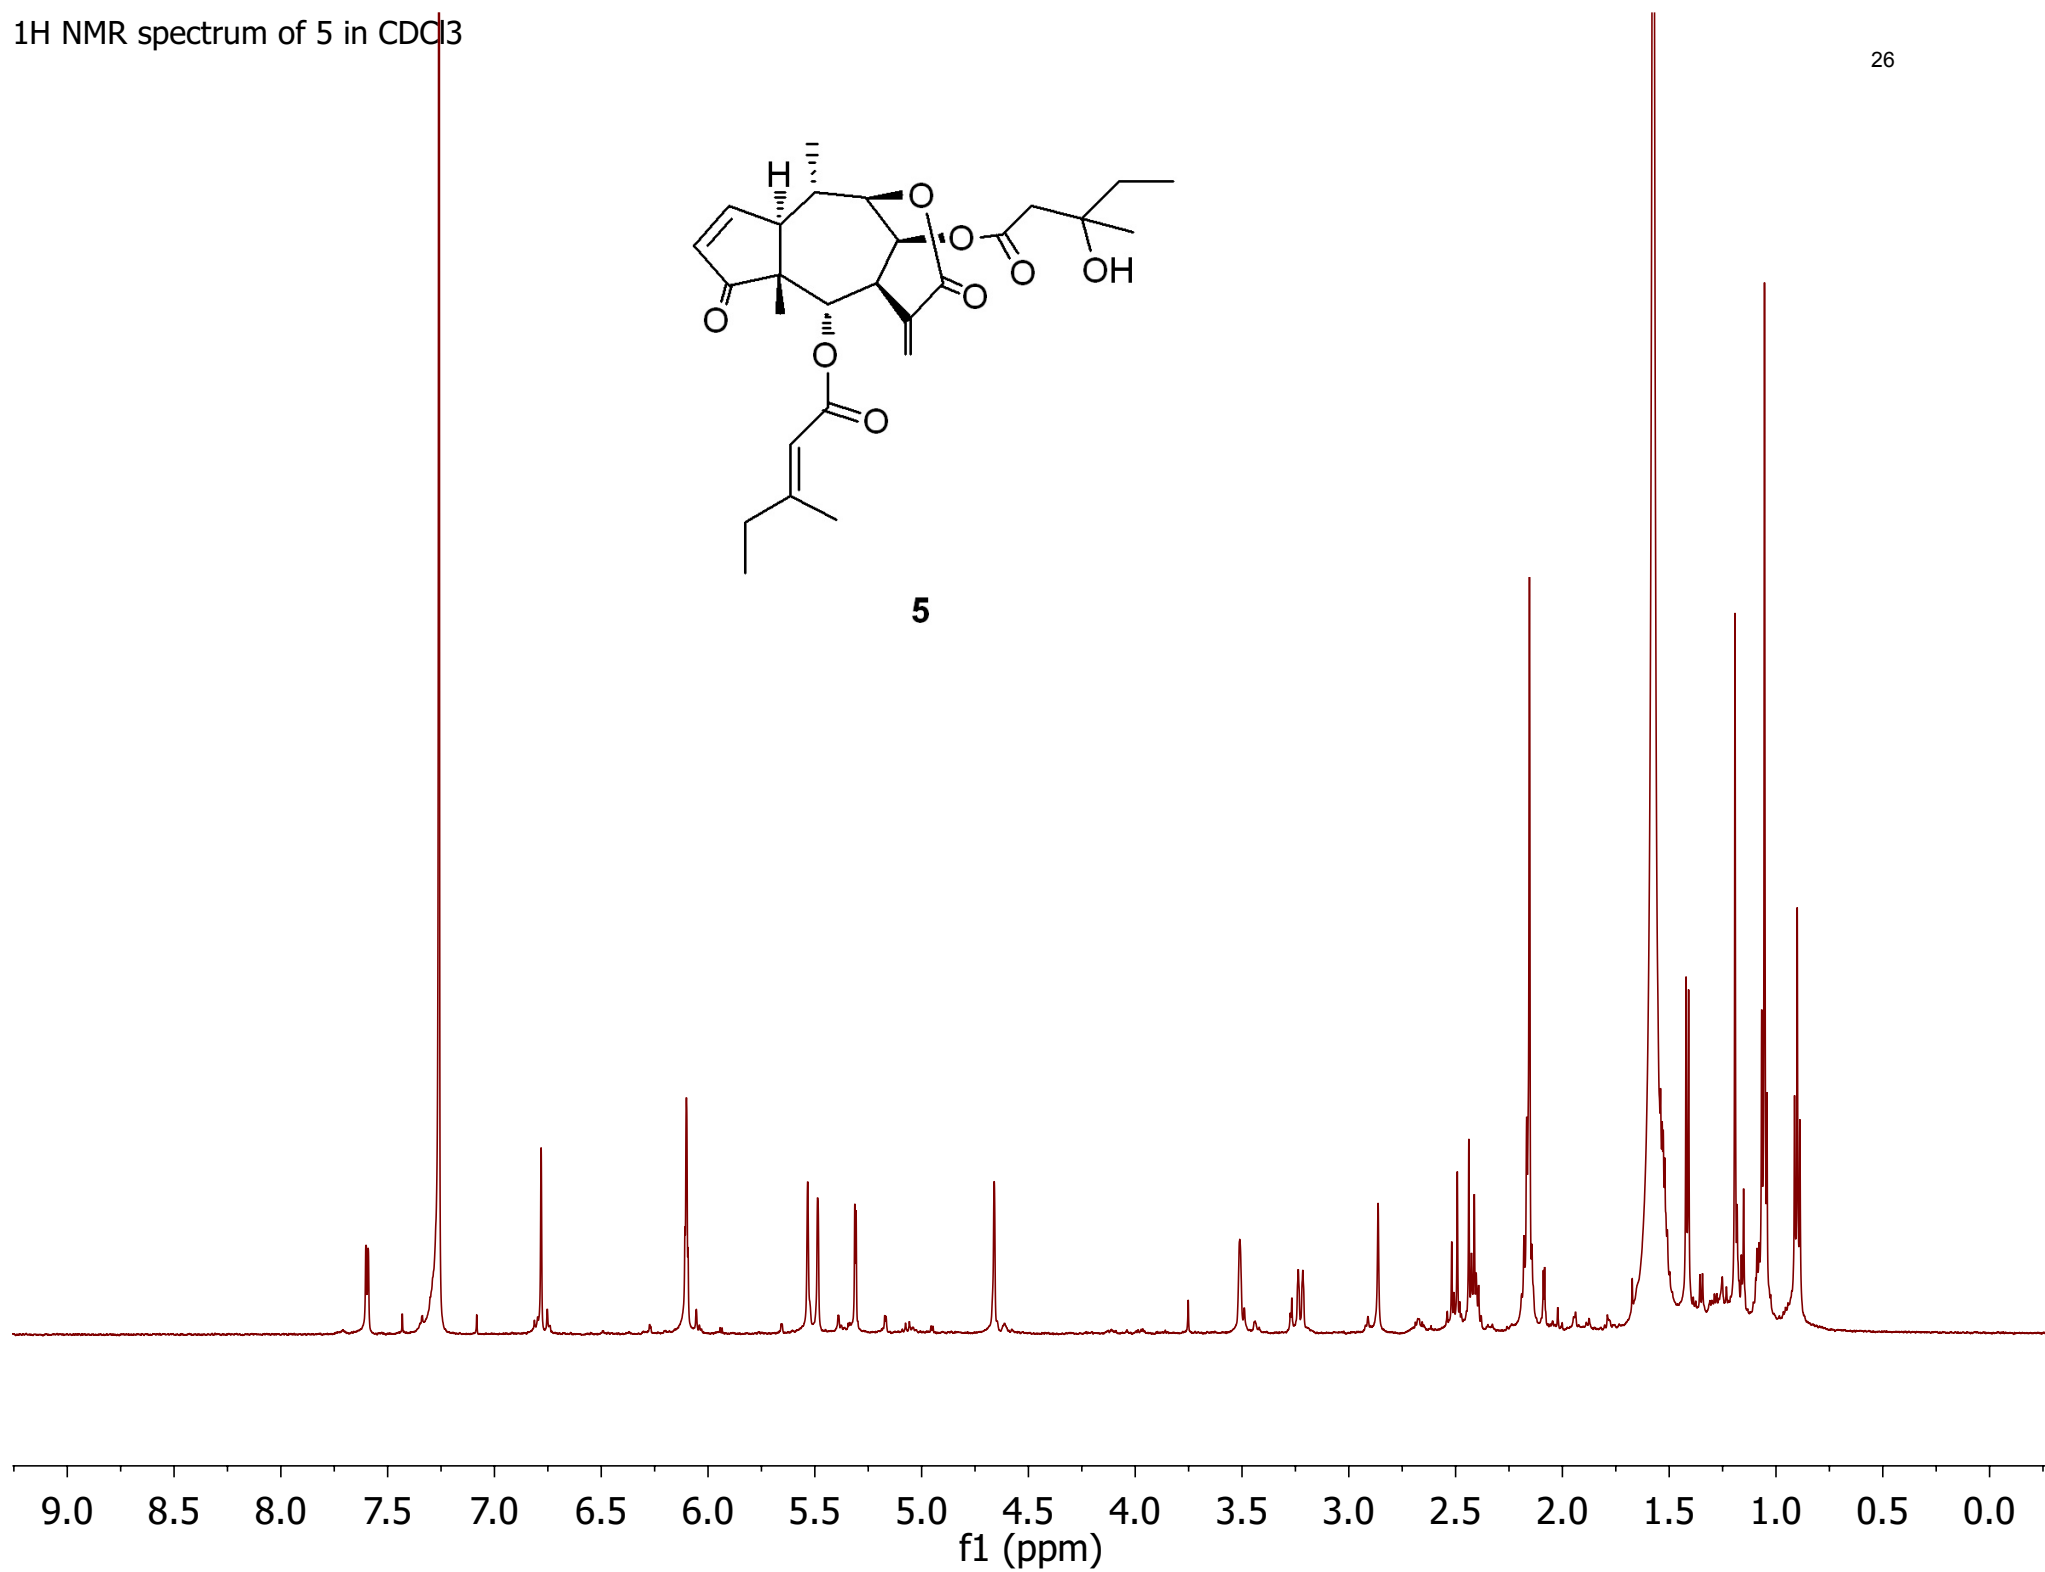

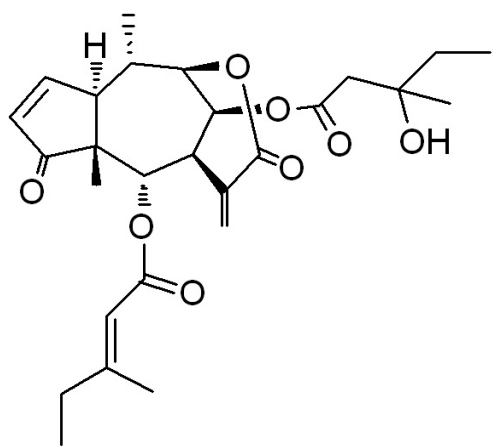

**5**

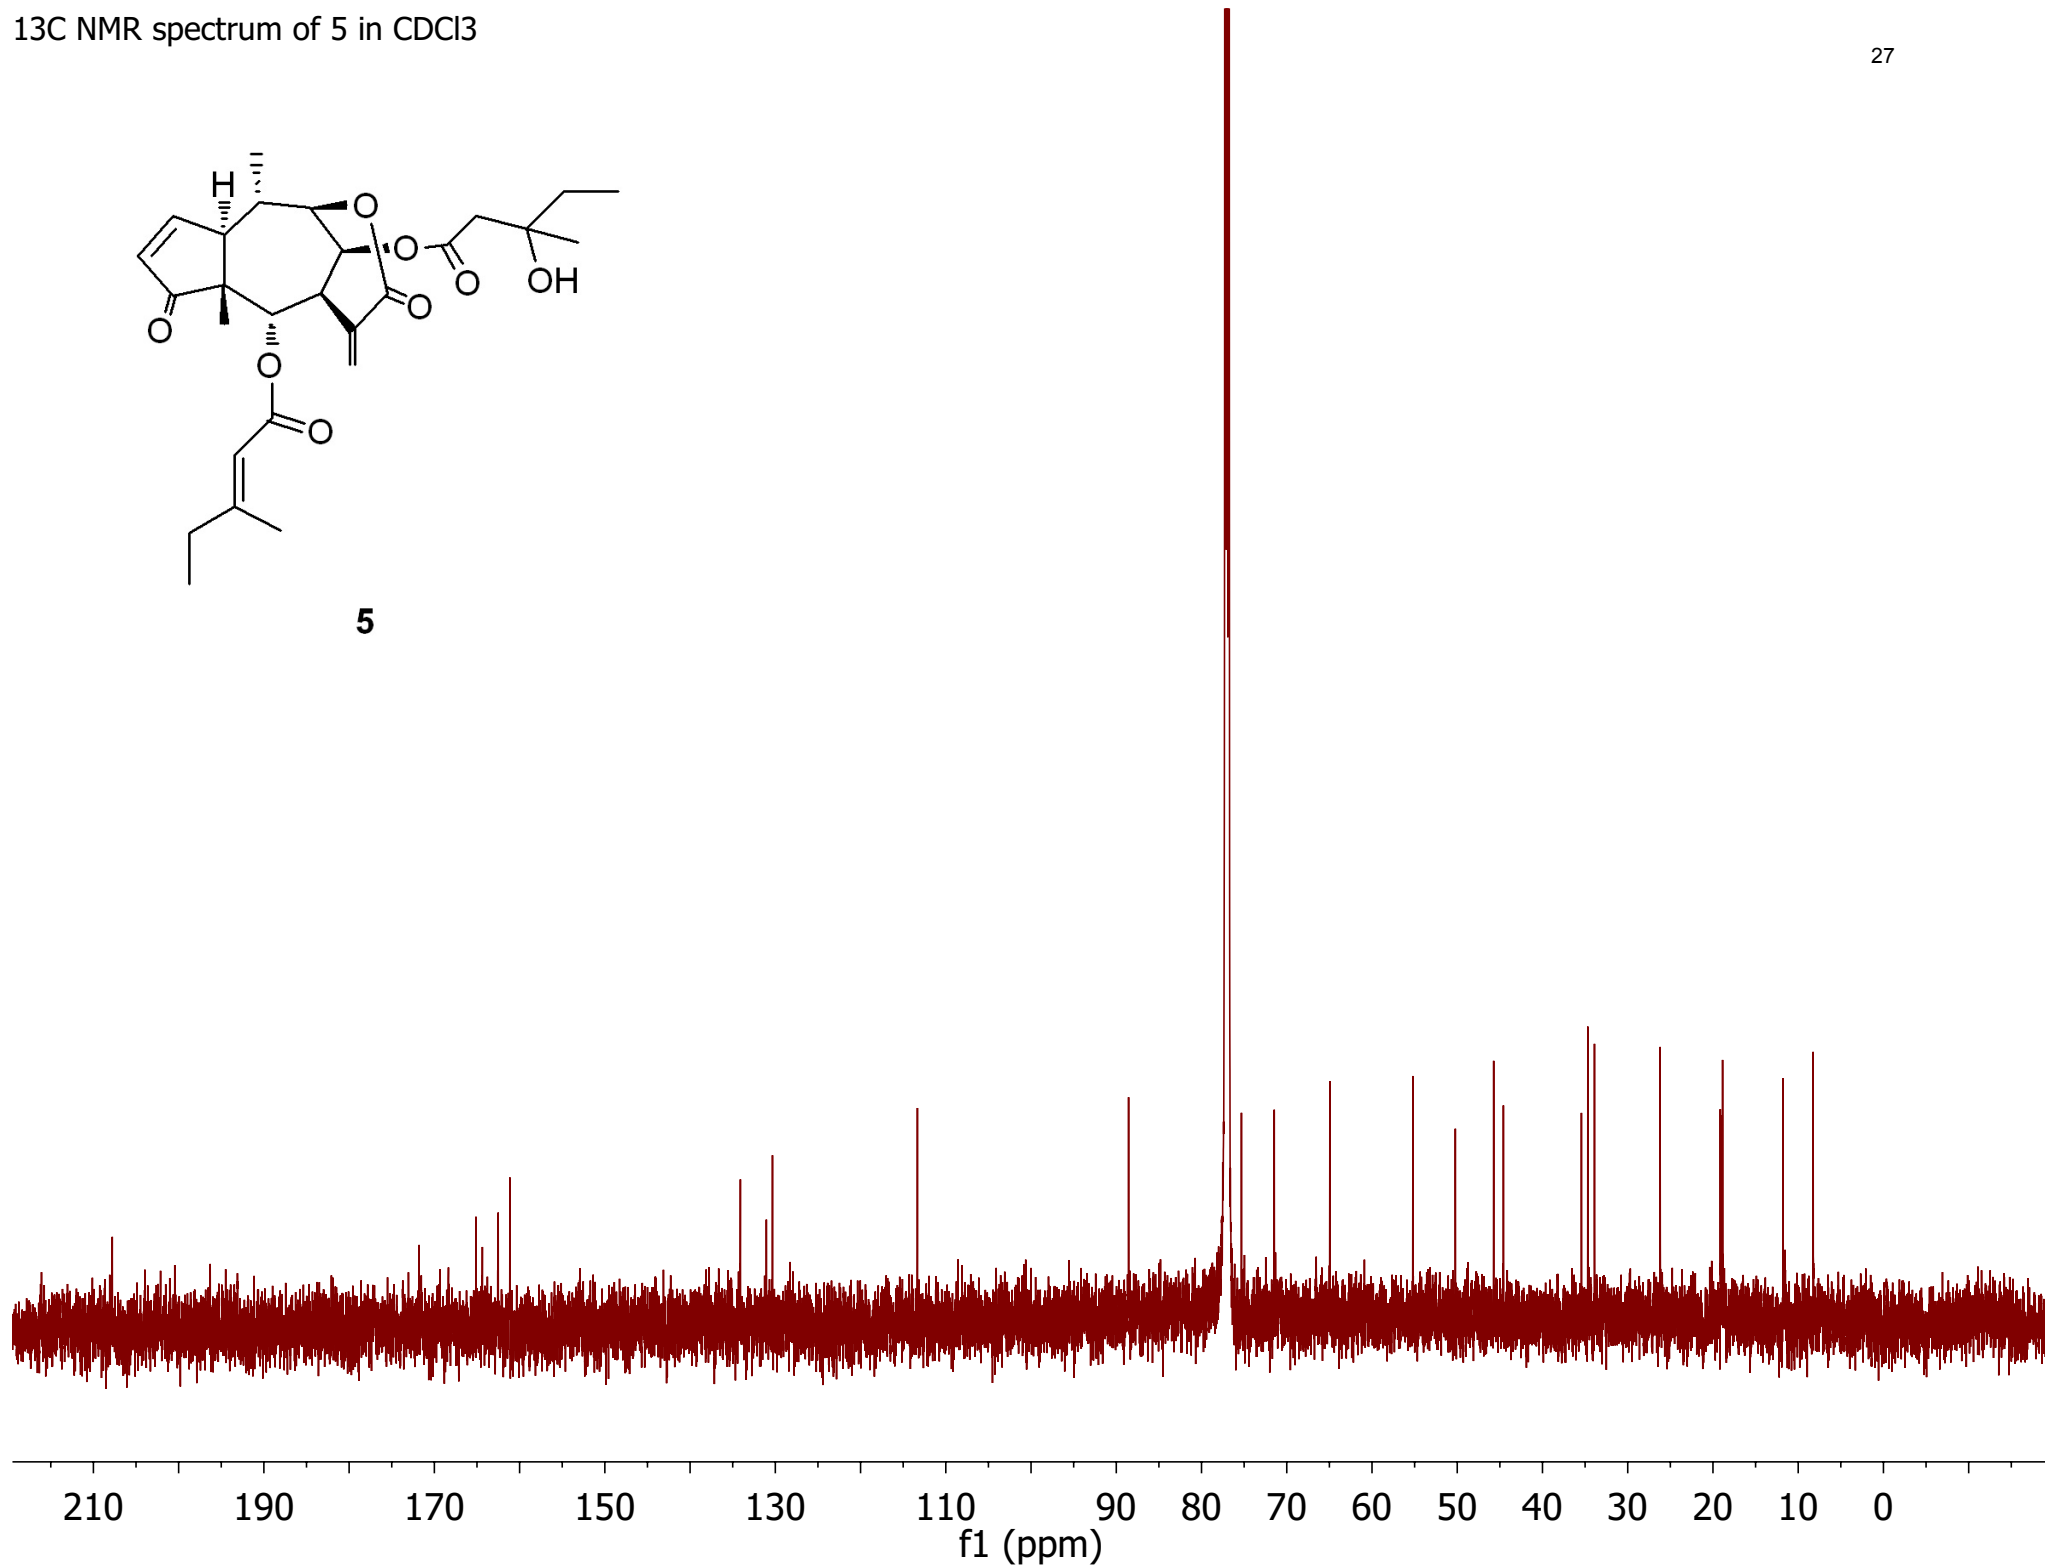

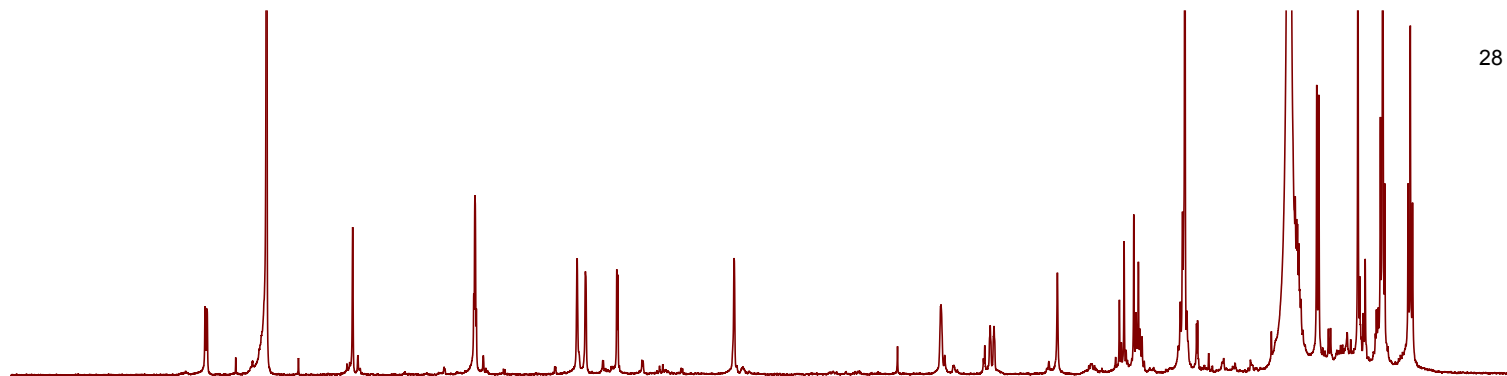COSY spectrum of 5 in CDCl<sub>3</sub>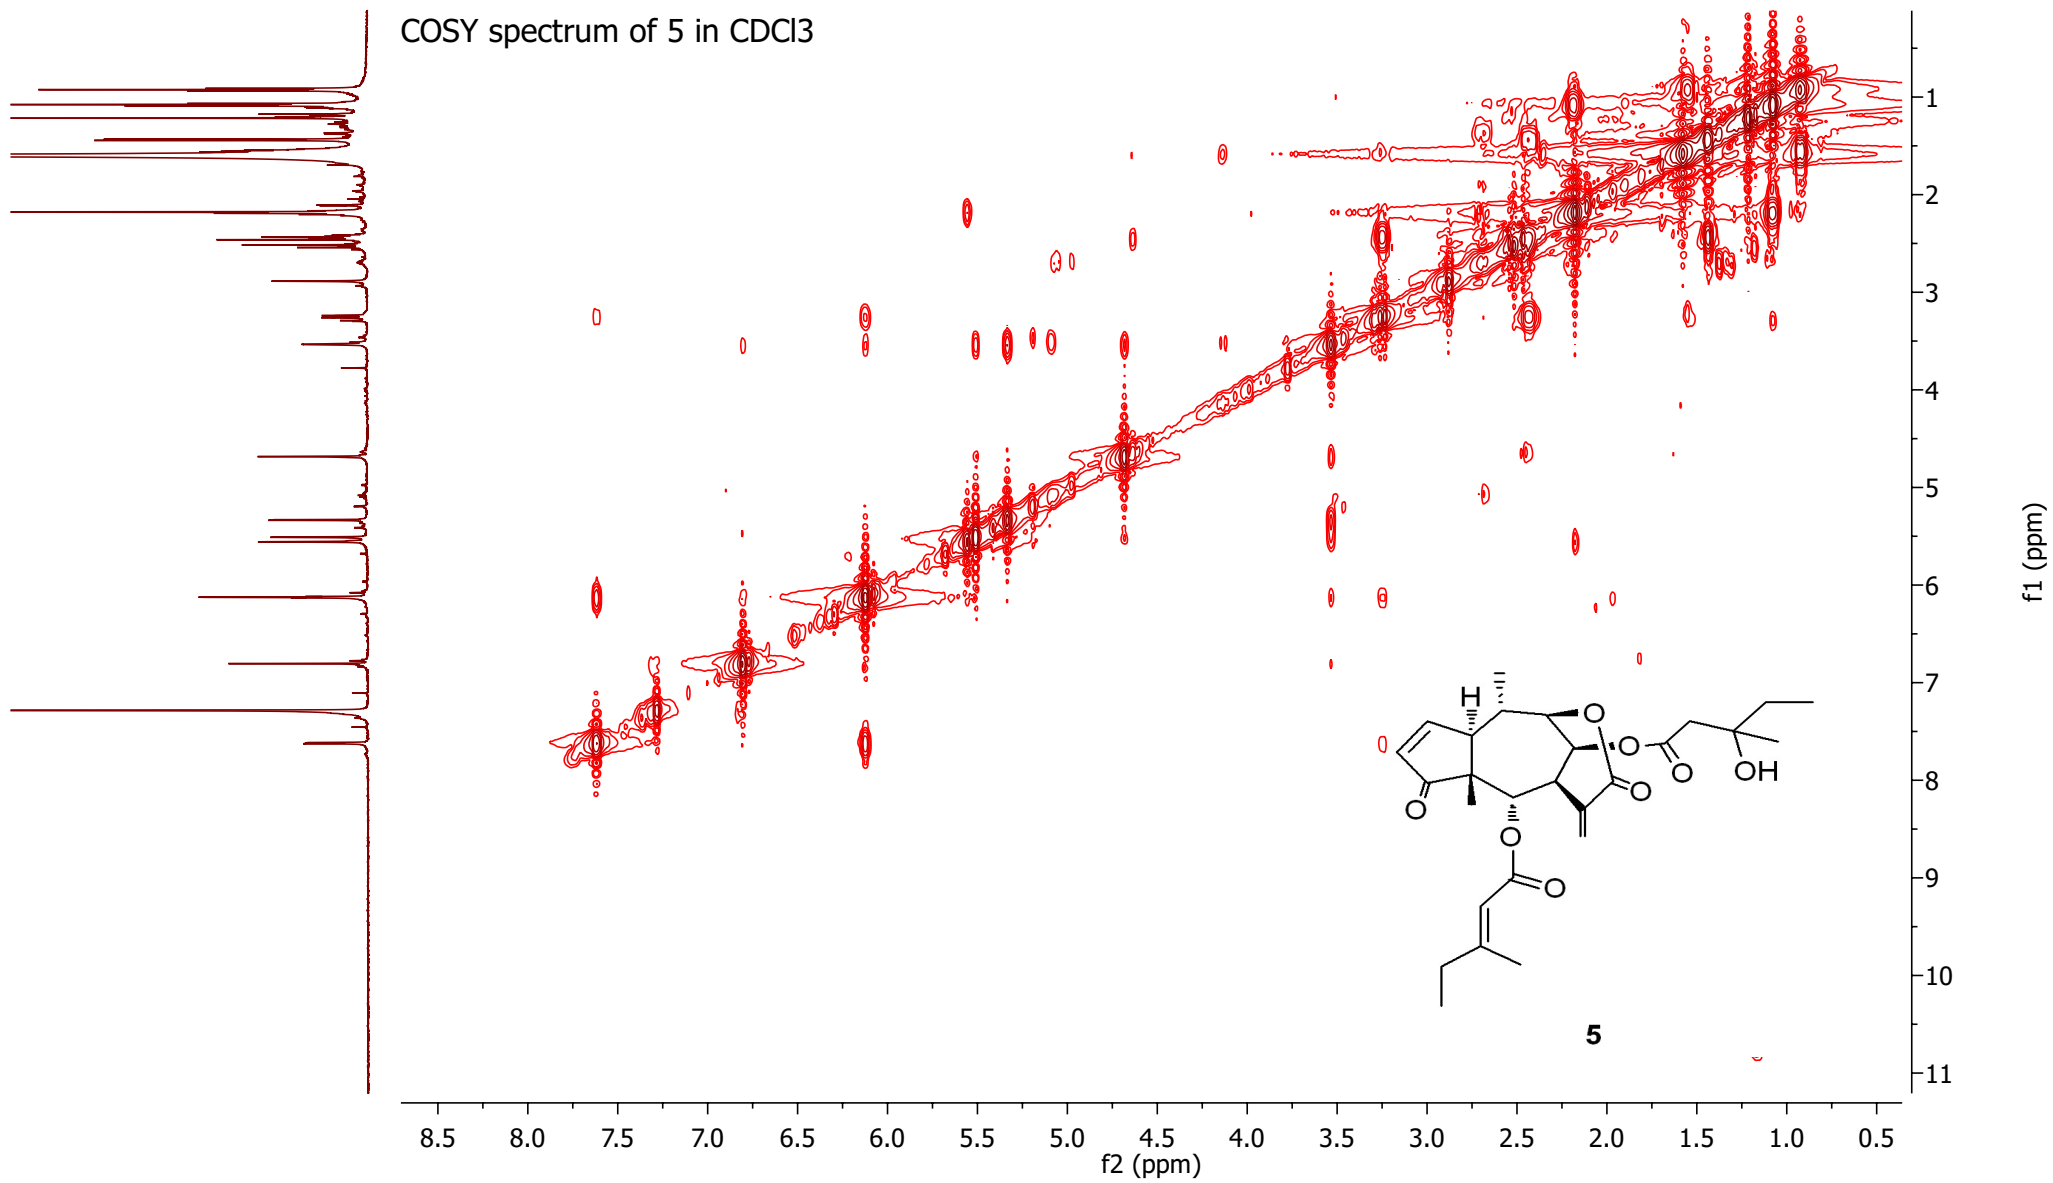

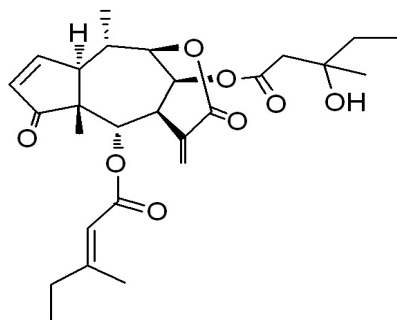

5

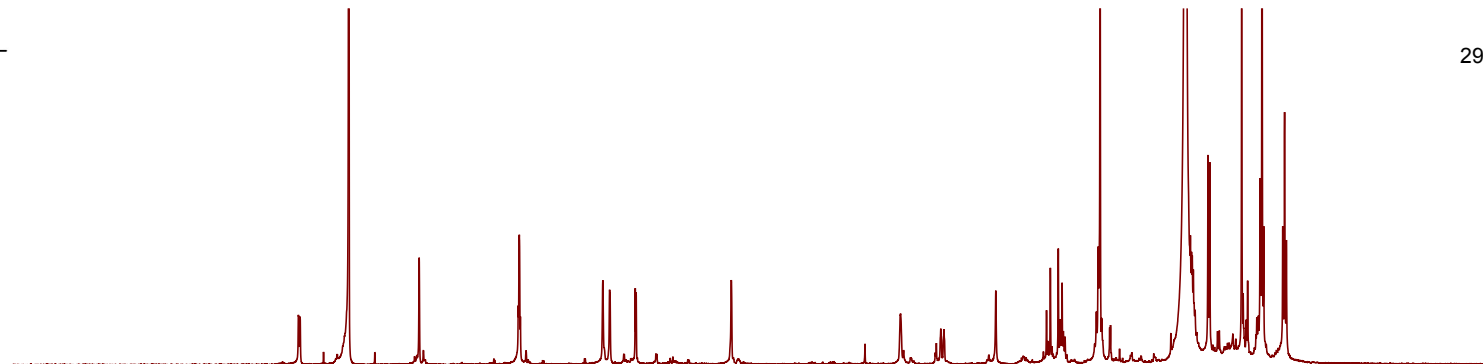NOESY spectrum of 5 in CDCl<sub>3</sub>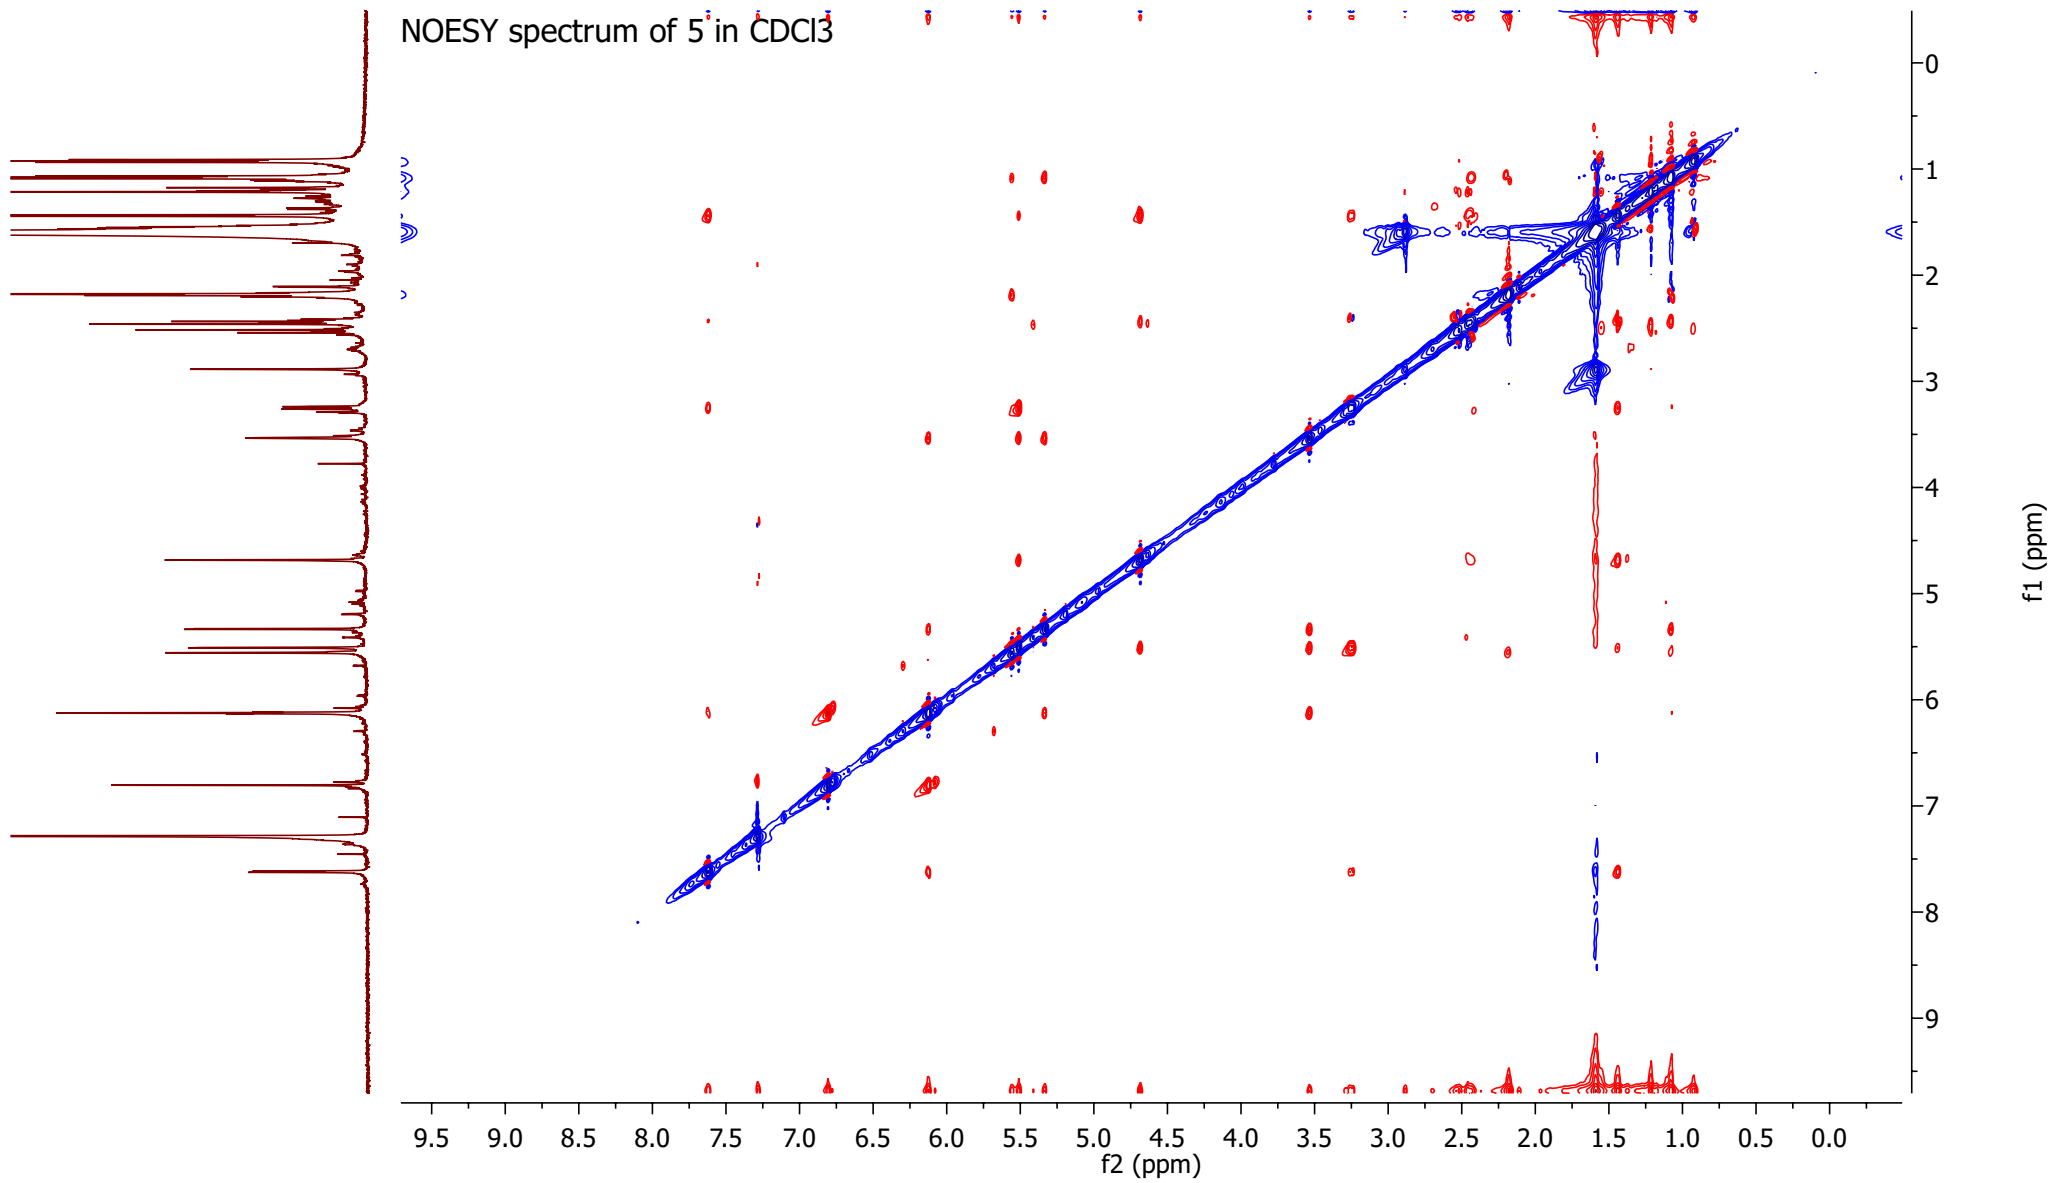

HMQC spectrum of **5** in CDCl<sub>3</sub>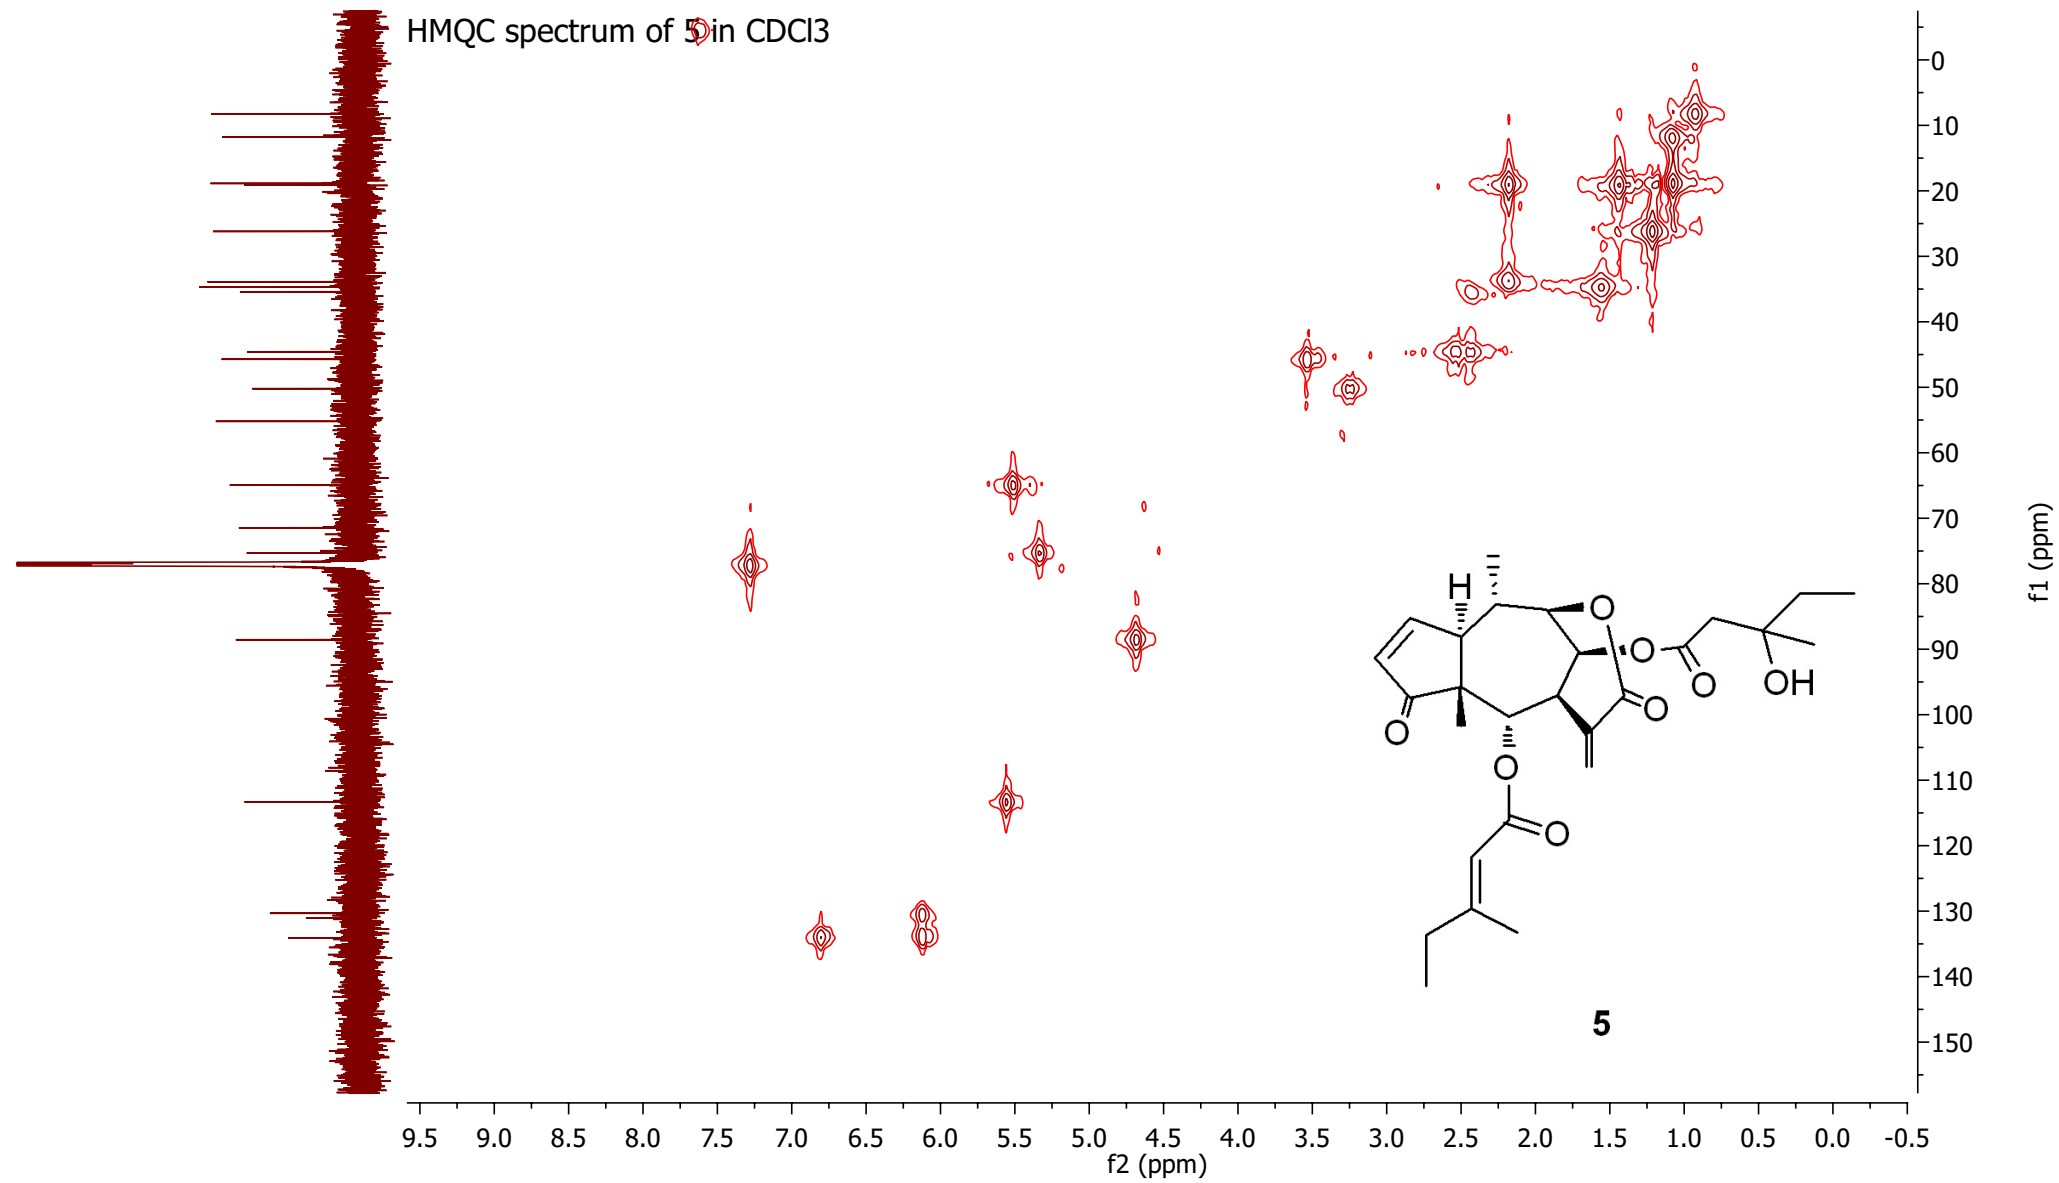

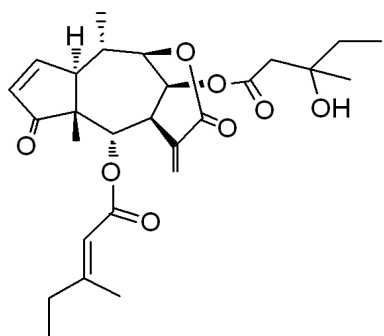

5

HMBC spectrum of 5 in CDCl<sub>3</sub>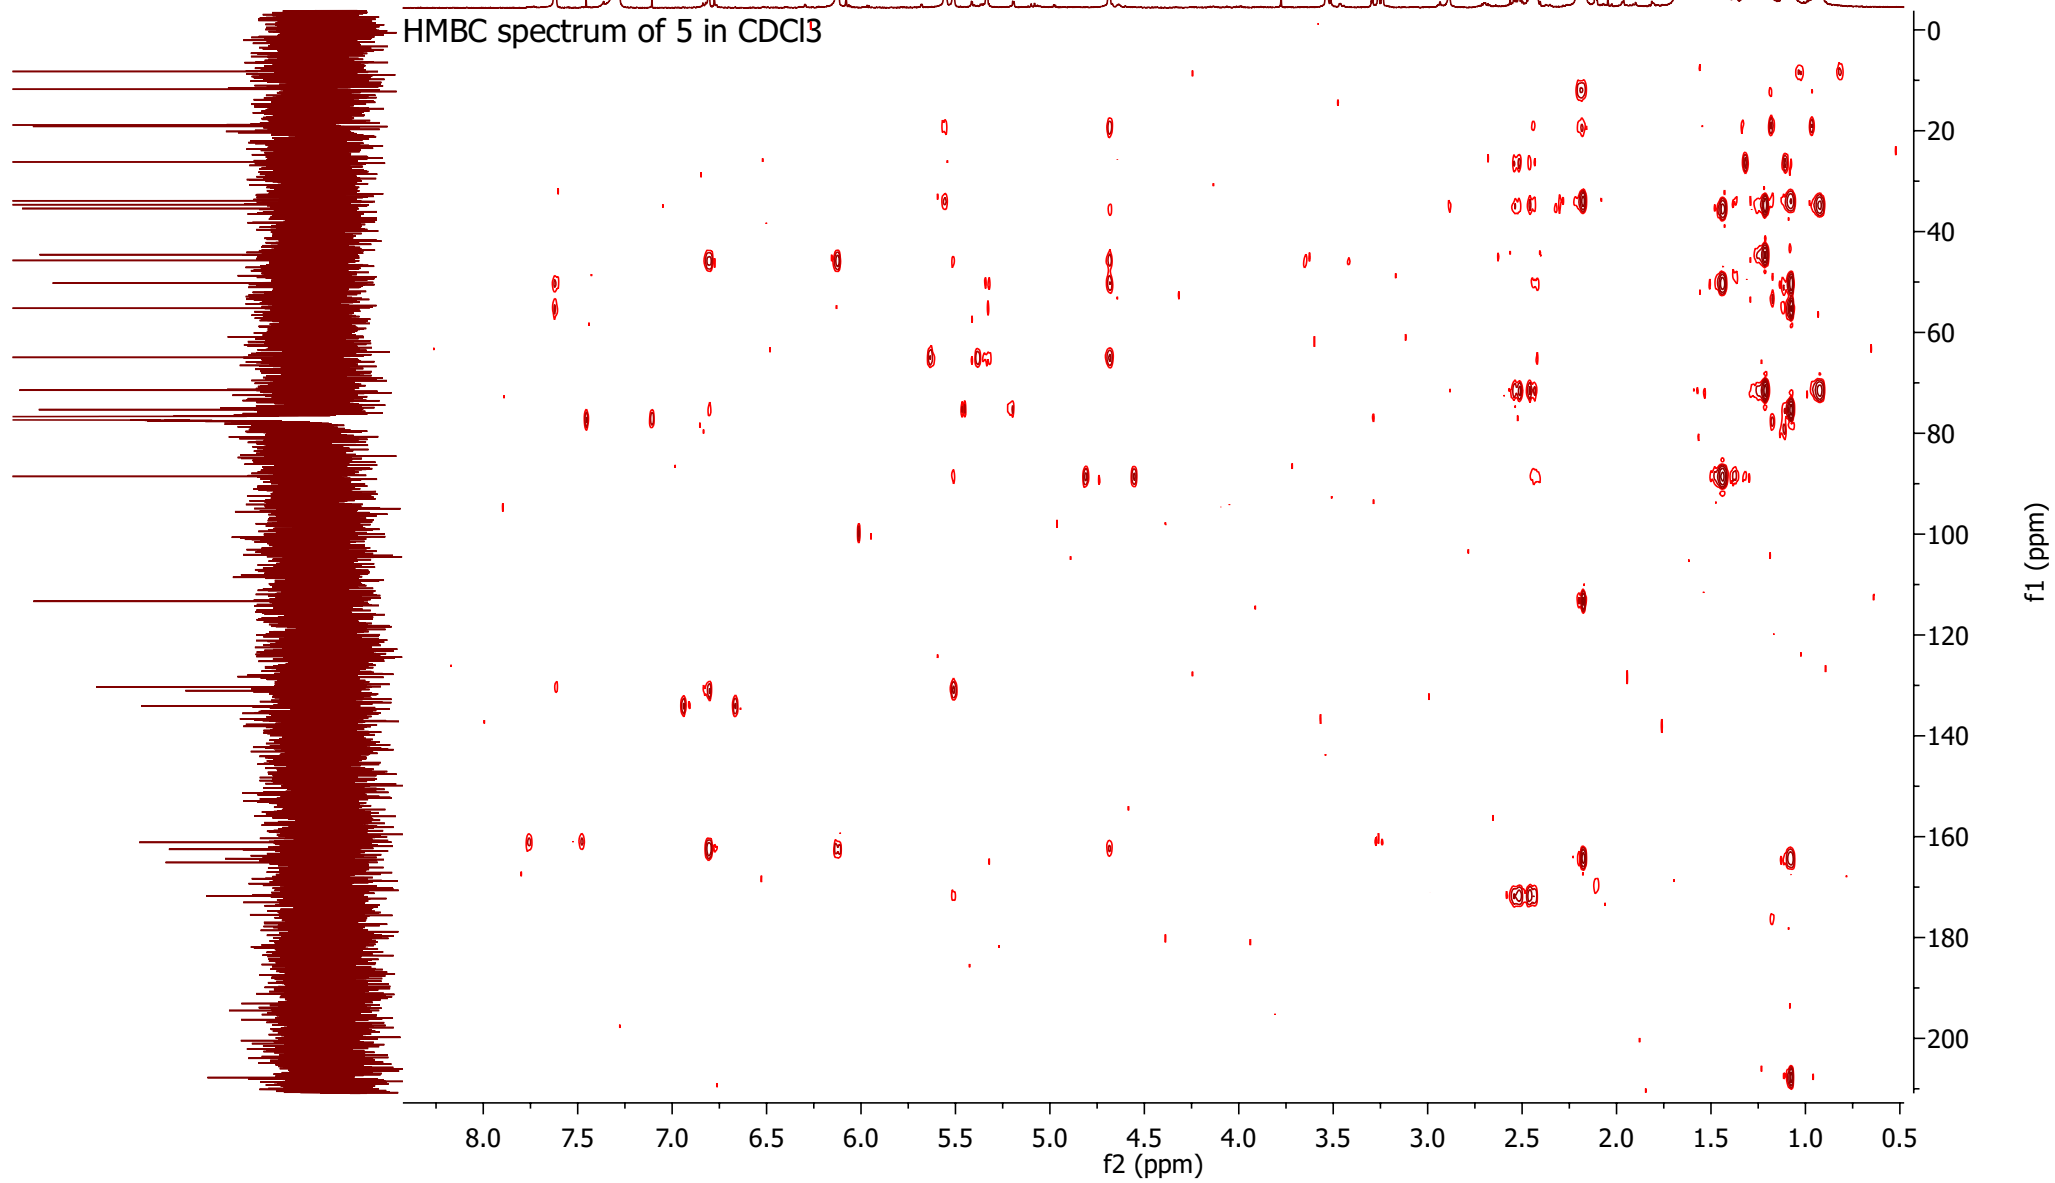

Supplement: NIHMS332172-supplement-1_si_001.pdf [file NIHMS332172-supplement-1_si_001.pdf]
